# Supplementary material for: SPINNAKER: an R-based tool to highlight key RNA interactions in complex biological networks
Source: Springer Nature journal article supplement (doi:10.1186/s12859-022-04695-x), 2022-05-06
Supplement: MOESM5 [file 12859_2022_4695_MOESM5_ESM-1.pdf]

# Original code (MATLAB) *versus* SPINNAKER (R)

## Results comparison

We compared the results obtained by using the original code running on MATLAB and SPINNAKER running on R environment, when analysing the original dataset of breast invasive carcinoma from [1], with 20531 genes and 114 samples (72 tumors and 72-matched normal tissues) retrieved from The Cancer Genome Atlas [2].

We found comparable results between the original code running on MATLAB and SPINNAKER running on R that we detailed in the following.

### ceRNA network

By running the original code (on MATLAB) and SPINNAKER (on R), we found 92% of common ceRNA-ceRNA-miRNA triplets in breast cancer tissues (Figure S1 left), and 87 % of common triplets in breast normal tissues (Figure S1 right).

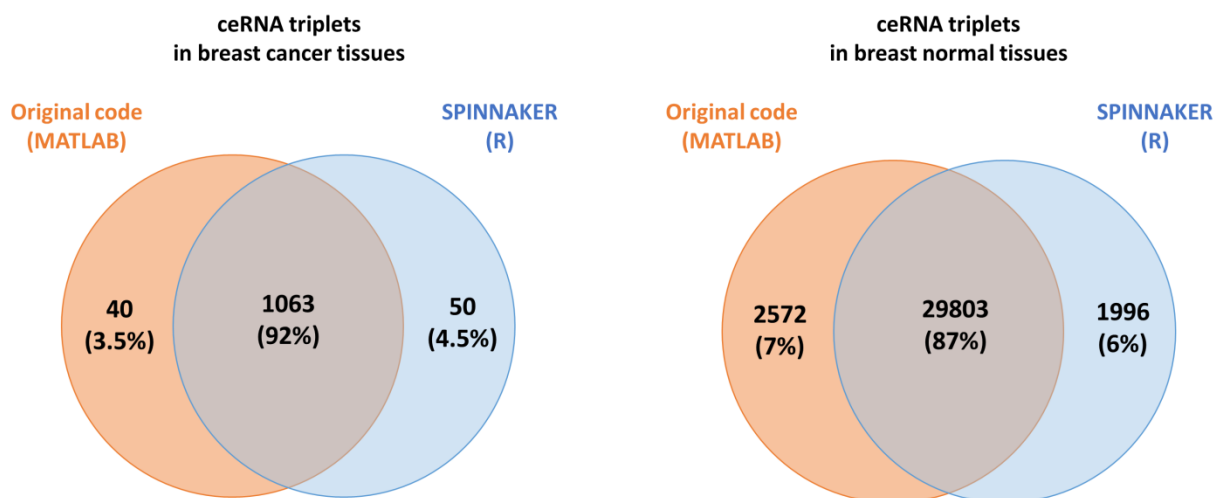

**Figure S1.** Venn Diagram of triplets (ceRNA-ceRNA-miRNA) obtained from breast cancer (left) and normal (right) tissues by running the original code (on MATLAB) and SPINNAKER (on R).

The corresponding heatmaps of sensitivity correlations are shown in Figure S2-3.

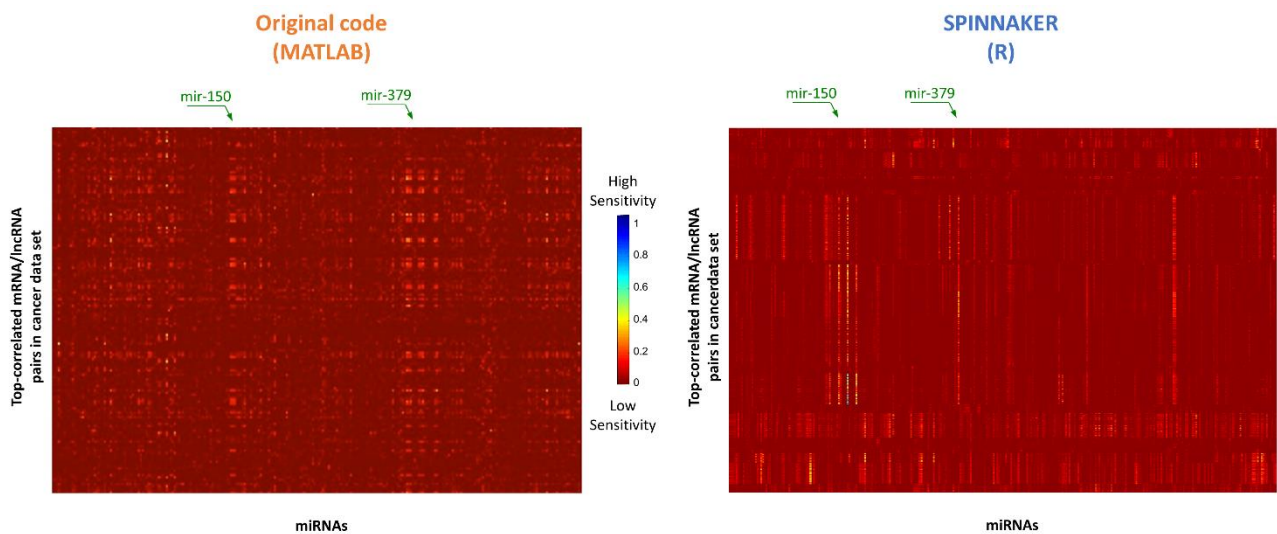

**Figure S2.** Heatmap of sensitivity correlation, calculated for the top-correlated RNA pairs in the cancer breast dataset by running the original code on MATLAB (left) and SPINNAKER on R (right). Bright vertical stripes refer to a small set of miRNAs mediating the interactions between the top-correlated RNA pairs; sensitivity correlation values ( $S$ ) increase from red ( $S=0$ ) to blue ( $S=1$ ).

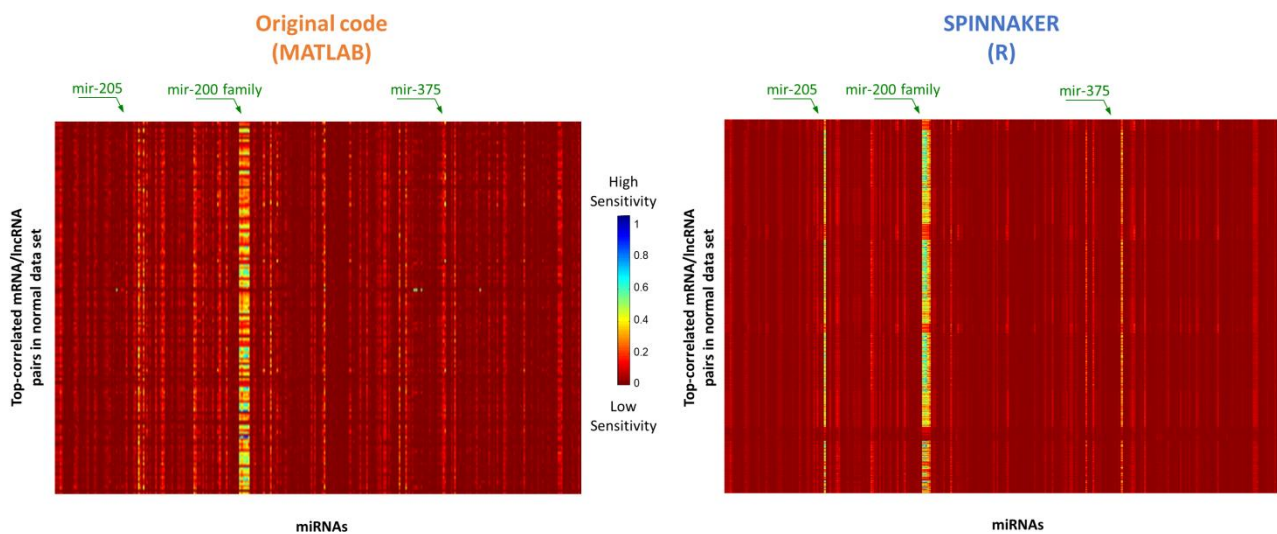

**Figure S3.** Heatmap of sensitivity correlation, calculated for the top-correlated RNA pairs in the normal breast dataset by running the original code on MATLAB (left) and SPINNAKER on R (right). Bright vertical stripes refer to a small set of miRNAs mediating the interactions between the top-correlated RNA pairs; sensitivity correlation values ( $S$ ) increase from red ( $S=0$ ) to blue ( $S=1$ ).

The detailed list of miRNAs mediating the ceRNA interactions in breast cancer and normal tissues are shown in Table S1 and S2, respectively.

**Table S1.** miRNAs names along with the number of ceRNA interactions that they are mediating in cancer tissues by running the original code on MATLAB (right) and SPINNAKER on R (left). Common miRNAs are highlighted in red.

| Cancer breast tissues | SPINNAKER (R)  |                               | Original code (MATLAB) |                               |
|-----------------------|----------------|-------------------------------|------------------------|-------------------------------|
|                       | miRNA          | # ceRNA mediated interactions | miRNA                  | # ceRNA mediated interactions |
|                       | hsa-mir-150    | 838                           | hsa-mir-150            | 825                           |
|                       | hsa-mir-379    | 116                           | hsa-mir-379            | 111                           |
|                       | hsa-mir-370    | 26                            | hsa-mir-370            | 26                            |
|                       | hsa-mir-382    | 25                            | hsa-mir-382            | 23                            |
|                       | hsa-let-7c     | 22                            | hsa-let-7c             | 21                            |
|                       | hsa-mir-93     | 17                            | hsa-mir-93             | 17                            |
|                       | hsa-mir-432    | 13                            | hsa-mir-411            | 15                            |
|                       | hsa-mir-127    | 12                            | hsa-mir-432            | 13                            |
|                       | hsa-mir-106b   | 8                             | hsa-mir-127            | 12                            |
|                       | hsa-mir-199a-1 | 6                             | hsa-mir-106b           | 8                             |
|                       | hsa-mir-411    | 6                             | hsa-mir-155            | 5                             |
|                       | hsa-mir-155    | 5                             | hsa-mir-199a-1         | 4                             |
|                       | hsa-mir-146a   | 4                             | hsa-mir-223            | 4                             |
|                       | hsa-mir-223    | 4                             | hsa-mir-134            | 2                             |
|                       | hsa-mir-134    | 2                             | hsa-mir-146a           | 2                             |
|                       | hsa-mir-18a    | 2                             | hsa-mir-18a            | 2                             |
|                       | hsa-mir-199b   | 2                             | hsa-mir-199b           | 2                             |
|                       | hsa-mir-1307   | 1                             | hsa-mir-410            | 2                             |
|                       | hsa-mir-17     | 1                             | hsa-mir-494            | 2                             |
|                       | hsa-mir-22     | 1                             | hsa-mir-1248           | 1                             |
|                       | hsa-mir-511-1  | 1                             | hsa-mir-1307           | 1                             |
|                       | hsa-mir-889    | 1                             | hsa-mir-17             | 1                             |
|                       | <b>Total</b>   | <b>1113</b>                   | hsa-mir-22             | 1                             |
|                       |                |                               | hsa-mir-511-1          | 1                             |
|                       |                |                               | hsa-mir-543            | 1                             |
|                       |                |                               | hsa-mir-889            | 1                             |
|                       |                |                               | <b>Total</b>           | <b>1103</b>                   |

**Table S2.** miRNAs names along with the number of ceRNA interactions that they are mediating in normal tissues by running the original code on MATLAB (right) and SPINNAKER on R (left). Common miRNAs are highlighted in red.

| Normal breast tissues | SPINNAKER (R)  |                               | Original code (MATLAB) |                               |
|-----------------------|----------------|-------------------------------|------------------------|-------------------------------|
|                       | miRNA          | # ceRNA mediated interactions | miRNA                  | # ceRNA mediated interactions |
|                       | hsa-mir-141    | 7546                          | hsa-mir-141            | 7526                          |
|                       | hsa-mir-200a   | 7430                          | hsa-mir-200a           | 7410                          |
|                       | hsa-mir-200c   | 4381                          | hsa-mir-200c           | 4348                          |
|                       | hsa-mir-200b   | 3993                          | hsa-mir-200b           | 3965                          |
|                       | hsa-mir-205    | 3656                          | hsa-mir-205            | 3590                          |
|                       | hsa-mir-429    | 1523                          | hsa-mir-135b           | 1504                          |
|                       | hsa-mir-375    | 1144                          | hsa-mir-375            | 1076                          |
|                       | hsa-mir-22     | 777                           | hsa-mir-31             | 890                           |
|                       | hsa-mir-181c   | 542                           | hsa-mir-22             | 767                           |
|                       | hsa-mir-452    | 315                           | hsa-mir-181c           | 538                           |
|                       | hsa-mir-378    | 215                           | hsa-mir-452            | 315                           |
|                       | hsa-mir-224    | 102                           | hsa-mir-378            | 211                           |
|                       | hsa-mir-215    | 86                            | hsa-mir-224            | 105                           |
|                       | hsa-mir-652    | 29                            | hsa-mir-215            | 86                            |
|                       | hsa-mir-193a   | 23                            | hsa-mir-652            | 29                            |
|                       | hsa-mir-335    | 15                            | hsa-mir-335            | 15                            |
|                       | hsa-mir-146b   | 5                             | <b>Total</b>           | <b>32375</b>                  |
|                       | hsa-mir-148    | 5                             |                        |                               |
|                       | hsa-mir-181d   | 5                             |                        |                               |
|                       | hsa-mir-196a-1 | 4                             |                        |                               |
|                       | hsa-mir-133a-1 | 2                             |                        |                               |
|                       | hsa-mir-193b   | 1                             |                        |                               |
|                       | <b>Total</b>   | <b>31799</b>                  |                        |                               |

## PVT1 sub-network

By extracting the sub-network of ceRNA interactions orchestrated by the long-non coding RNA PVT1 in normal breast tissues, we found that the miR-200 family is the most represented miRNA, mediating 85% of the ceRNA interactions when running the original code (MATLAB) and 89% of the ceRNA interactions when running SPINNAKER (R), followed by the miR-205 in both cases (Figure S4). Thus, the main result of the long non-coding RNA PVT1 functioning as ceRNA for the miR-200 family is confirmed.

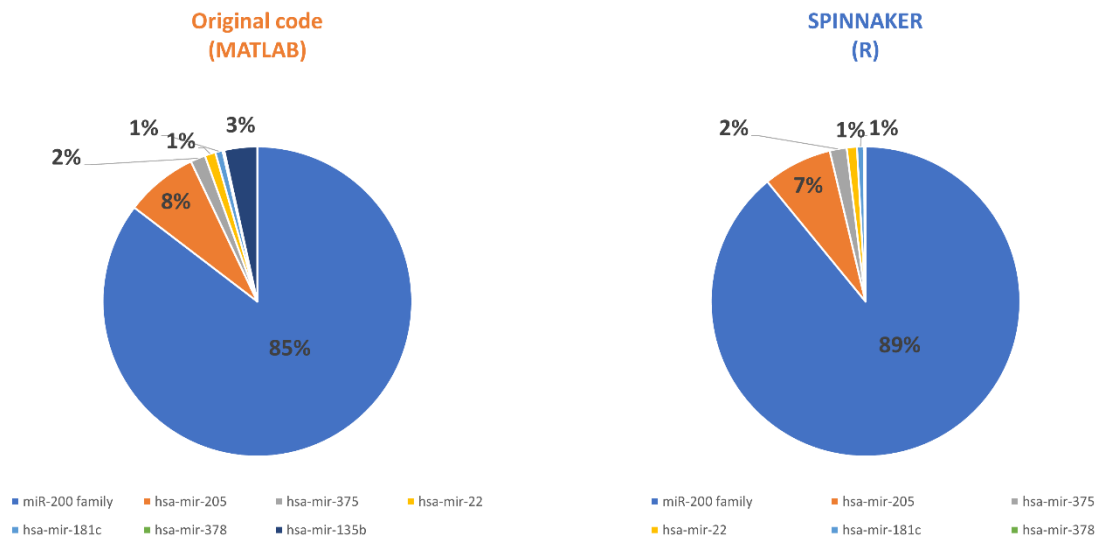

**Figure S4.** Pie chart of the miRNAs mediating the PVT1-ceRNA interactions in normal breast tissues by running the original code on MATLAB (left) and SPINNAKER on R (right)

Taken together all these findings show that the results obtained by using the original code (MATLAB) are confirmed by SPINNAKER (R).

## References

- [1] Paci P, Colombo T, Farina L. Computational analysis identifies a sponge interaction network between long non-coding RNAs and messenger RNAs in human breast cancer. *BMC Syst Biol* 2014; 8: 83.
- [2] Tomczak K, Czerwinska P, Wiznerowicz M, et al. The Cancer Genome Atlas (TCGA): an immeasurable source of knowledge. *Contemp Oncol Pozn* 2015; 19: A68–A77.
