# Supplementary material for: SPINNAKER: an R-based tool to highlight key RNA interactions in complex biological networks
Source: BMC Bioinformatics. 2022 May 6;23:166. doi: 10.1186/s12859-022-04695-x (PMC9073480; doi:10.1186/s12859-022-04695-x)
Supplement: Supplementary file 3 — Additional file 3: ceRNA interaction network obtained by running SPINNAKER on thyroid carcinoma dataset. [file 12859_2022_4695_MOESM3_ESM.xlsx]

## Sheet: ceRNA_network_thca
ceRNA1	ceRNA2	miRNA	correlation	partial_correlation	sensitivity	p_value				hsa-miR-27a-3p	45
ABCD2	HCP5	hsa-miR-142-5p	0.722006	0.266261	0.455746	8.1071e-07				hsa-miR-30a-5p	42
ABCD2	MIR155HG	hsa-miR-142-5p	0.717117	0.324504	0.392613	8.1071e-07				hsa-miR-204-5p	33
ABHD10	CASC2	hsa-miR-21-5p	0.638783	0.420596	0.218187	1.42171e-17				hsa-miR-23a-3p	33
ACACB	CASC2	hsa-miR-103a-3p	0.72676	0.616537	0.110224	7.22585e-08				hsa-miR-21-5p	25
ACTN1	MIAT	hsa-miR-30a-5p	0.66733	0.483075	0.184255	3.63917e-19				hsa-miR-130a-3p	24
ADAM19	HCP5	hsa-miR-146a-5p	0.694169	0.533544	0.160625	1.58824e-06				hsa-miR-155-5p	22
ADAM19	HCP5	hsa-miR-150-5p	0.694169	0.27629	0.417879	0.000903287				hsa-miR-103a-3p	21
ADAM19	MIAT	hsa-miR-30a-5p	0.623053	0.461366	0.161687	3.63917e-19				hsa-miR-135a-5p	21
ADAM19	MIR155HG	hsa-miR-150-5p	0.734869	0.426644	0.308225	0.000903287				hsa-miR-142-5p	21
ADAMTS14	SNHG12	hsa-miR-98-5p	0.648713	0.530031	0.118681	0.000189631				hsa-miR-142-3p	19
AGBL4	LOH12CR2	hsa-miR-204-5p	0.645311	0.471627	0.173685	6.22777e-25				hsa-miR-199b-5p	14
AIDA	SNHG12	hsa-miR-27a-3p	0.639524	0.498138	0.141387	7.57864e-21				hsa-miR-30c-5p	13
AIFM1	LOH12CR2	hsa-miR-22-3p	0.68435	0.536425	0.147924	0.190076				hsa-miR-139-5p	11
ANK1	MIR155HG	hsa-miR-582-5p	0.698094	0.577595	0.120499	0.00010144				hsa-miR-30e-5p	11
ANKRD46	CASC2	hsa-miR-21-5p	0.759875	0.402714	0.357161	1.42171e-17				hsa-miR-214-5p	10
ANXA2	EGOT	hsa-miR-23a-3p	0.667463	0.502314	0.165149	1.00416e-18				hsa-miR-874-3p	9
ANXA2	HCP5	hsa-miR-23a-3p	0.659614	0.486787	0.172827	1.00416e-18				hsa-miR-98-5p	9
ARF6	EGOT	hsa-miR-27a-3p	0.644513	0.42976	0.214753	7.57864e-21				hsa-miR-146a-5p	8
ARF6	HCP5	hsa-miR-199b-5p	0.683335	0.533243	0.150093	2.65505e-05				hsa-miR-150-5p	8
ARF6	HCP5	hsa-miR-27a-3p	0.683335	0.489055	0.194281	7.57864e-21				hsa-miR-152-3p	8
ARHGAP24	LOH12CR2	hsa-miR-130b-3p	0.640343	0.53351	0.106832	0.000886826				hsa-miR-125b-5p	5
ARID5B	MIAT	hsa-miR-874-3p	0.644894	0.458316	0.186578	8.03837e-11				hsa-miR-148b-3p	5
ARL4C	HCP5	hsa-miR-27a-3p	0.672222	0.541901	0.130321	7.57864e-21				hsa-miR-23b-3p	5
ARL4C	MIAT	hsa-miR-30a-5p	0.68847	0.490922	0.197548	3.63917e-19				hsa-miR-30b-5p	5
ARL4C	MIAT	hsa-miR-874-3p	0.68847	0.568108	0.120363	8.03837e-11				hsa-miR-31-5p	5
ARL4C	MIR155HG	hsa-miR-27a-3p	0.667342	0.549835	0.117508	7.57864e-21				hsa-let-7b-5p	4
ARL4C	MIR155HG	hsa-miR-30a-5p	0.667342	0.506461	0.160882	3.63917e-19				hsa-miR-146b-5p	4
ARNTL2	EGOT	hsa-miR-135a-5p	0.677536	0.497188	0.180348	3.33834e-10				hsa-miR-199a-3p	4
ARNTL2	HCP5	hsa-miR-135a-5p	0.777585	0.634257	0.143327	3.33834e-10				hsa-miR-199a-5p	4
ARNTL2	HCP5	hsa-miR-150-5p	0.777585	0.595468	0.182117	0.000903287				hsa-miR-199b-3p	4
ARRB2	HCP5	hsa-miR-155-5p	0.692261	0.257077	0.435184	3.08305e-11				hsa-miR-320b	4
ARRB2	MIR155HG	hsa-miR-155-5p	0.792839	0.464598	0.328241	3.08305e-11				hsa-miR-582-5p	4
ATP6V1B2	EGOT	hsa-miR-23a-3p	0.636508	0.420814	0.215694	1.00416e-18				hsa-miR-130b-3p	3
BCAT1	HCP5	hsa-miR-135a-5p	0.671238	0.559807	0.111431	3.33834e-10				hsa-miR-190a-5p	3
BCAT1	HCP5	hsa-miR-155-5p	0.671238	0.402591	0.268646	3.08305e-11				hsa-miR-221-3p	3
BCL2	CASC2	hsa-miR-204-5p	0.650797	0.417505	0.233291	6.22777e-25				hsa-miR-326	3
BCL2	CASC2	hsa-miR-21-5p	0.650797	0.227177	0.423619	1.42171e-17				hsa-let-7c-5p	2
BCL2	CASC2	hsa-miR-23a-3p	0.650797	0.510499	0.140297	1.00416e-18				hsa-miR-181d-5p	2
BCL2	LOH12CR2	hsa-miR-204-5p	0.633791	0.2543	0.37949	6.22777e-25				hsa-miR-222-3p	2
BCL2	LOH12CR2	hsa-miR-23a-3p	0.633791	0.491337	0.142454	1.00416e-18				hsa-miR-223-3p	2
BCL2	LOH12CR2	hsa-miR-30a-5p	0.633791	0.410338	0.223453	3.63917e-19				hsa-miR-22-3p	2
BCL2	LOH12CR2	hsa-miR-30c-5p	0.633791	0.387248	0.246543	1.99469e-08				hsa-miR-338-3p	2
BCL2	LOH12CR2	hsa-miR-30e-5p	0.633791	0.440562	0.193228	1.74289e-12				hsa-miR-455-3p	2
BCL3	HCP5	hsa-miR-27a-3p	0.625001	0.413814	0.211187	7.57864e-21				hsa-miR-106b-5p	1
BDH1	CASC2	hsa-miR-874-3p	0.711211	0.525658	0.185553	8.03837e-11				hsa-miR-1251-5p	1
BDH1	LOH12CR2	hsa-miR-874-3p	0.733009	0.535893	0.197116	8.03837e-11				hsa-miR-134-5p	1
BIRC3	EGOT	hsa-miR-142-3p	0.733117	0.530893	0.202224	9.58161e-10				hsa-miR-136-5p	1
BIRC3	HCP5	hsa-miR-142-3p	0.880397	0.639345	0.241052	9.58161e-10				hsa-miR-181c-5p	1
BIRC3	MIR155HG	hsa-miR-142-3p	0.690591	0.168311	0.52228	9.58161e-10				hsa-miR-215-5p	1
BRWD1	KCNQ1OT1	hsa-miR-130a-3p	0.691549	0.5608	0.130749	2.05074e-17				hsa-miR-218-5p	1
BTG1	MIR155HG	hsa-miR-142-5p	0.776891	0.467308	0.309583	8.1071e-07				hsa-miR-27b-3p	1
BTLA	HCP5	hsa-miR-142-3p	0.798856	0.291568	0.507288	9.58161e-10				hsa-miR-30d-5p	1
BTLA	MIR155HG	hsa-miR-142-3p	0.846519	0.567691	0.278829	9.58161e-10				hsa-miR-328-3p	1
BTN3A2	MIR155HG	hsa-miR-199a-3p	0.644809	0.464384	0.180425	0.208452				hsa-miR-335-5p	1
BTN3A2	MIR155HG	hsa-miR-199b-3p	0.644809	0.464259	0.180549	0.209323				hsa-miR-362-5p	1
C20orf203	RMST	hsa-miR-130a-3p	0.750068	0.613236	0.136832	2.05074e-17				hsa-miR-96-5p	1
C20orf203	RMST	hsa-miR-135a-5p	0.750068	0.616266	0.133801	3.33834e-10
C20orf203	RMST	hsa-miR-338-3p	0.750068	0.610864	0.139204	0.0687422
C2CD4A	EGOT	hsa-miR-27a-3p	0.670621	0.487392	0.183229	7.57864e-21
C2CD4A	HCP5	hsa-miR-27a-3p	0.660055	0.468199	0.191856	7.57864e-21
C3orf18	LOH12CR2	hsa-miR-30a-5p	0.659882	0.514345	0.145537	3.63917e-19
C3orf18	LOH12CR2	hsa-miR-30c-5p	0.659882	0.543313	0.116569	1.99469e-08
C9orf163	RMST	hsa-miR-1251-5p	0.629892	0.49184	0.138052	0.367659
C9orf163	RMST	hsa-miR-125b-5p	0.629892	0.513684	0.116208	0.000434908
C9orf163	RMST	hsa-miR-135a-5p	0.629892	0.493435	0.136457	3.33834e-10
C9orf163	RMST	hsa-miR-30b-5p	0.629892	0.521673	0.108219	1.01531e-08
CACNG4	MIAT	hsa-miR-31-5p	0.720367	0.600091	0.120275	5.70935e-05
CAMK4	HCP5	hsa-miR-155-5p	0.6935	0.193293	0.500207	3.08305e-11
CAMK4	MIR155HG	hsa-miR-155-5p	0.730881	0.21579	0.51509	3.08305e-11
CANX	CASC2	hsa-miR-139-5p	0.652227	0.528306	0.123921	4.9401e-08
CANX	CASC2	hsa-miR-148b-3p	0.652227	0.522165	0.130063	0.0979738
CANX	CASC2	hsa-miR-152-3p	0.652227	0.536072	0.116156	7.19902e-05
CARD11	HCP5	hsa-miR-155-5p	0.697142	0.351778	0.345364	3.08305e-11
CARD11	MIR155HG	hsa-miR-155-5p	0.700712	0.321437	0.379275	3.08305e-11
CCL20	EGOT	hsa-miR-21-5p	0.755861	0.380044	0.375818	1.42171e-17
CCL20	HCP5	hsa-miR-21-5p	0.642919	0.16134	0.481579	1.42171e-17
CCL22	EGOT	hsa-miR-21-5p	0.717408	0.294329	0.423079	1.42171e-17
CCL22	EGOT	hsa-miR-23a-3p	0.717408	0.549411	0.167996	1.00416e-18
CCL22	HCP5	hsa-miR-21-5p	0.758478	0.467254	0.291224	1.42171e-17
CCL22	HCP5	hsa-miR-23a-3p	0.758478	0.611593	0.146885	1.00416e-18
CCL22	MIR155HG	hsa-miR-21-5p	0.676367	0.467907	0.208459	1.42171e-17
CCM2	MIR155HG	hsa-miR-27a-3p	0.62486	0.507627	0.117233	7.57864e-21
CCM2	SNHG12	hsa-miR-27a-3p	0.657544	0.541041	0.116503	7.57864e-21
CCR7	HCP5	hsa-miR-21-5p	0.768192	0.641293	0.126898	1.42171e-17
CD180	HCP5	hsa-miR-214-5p	0.701437	0.562147	0.13929	4.89465e-08
CD69	HCP5	hsa-miR-103a-3p	0.746562	0.630151	0.11641	7.22585e-08
CD69	HCP5	hsa-miR-142-5p	0.746562	0.163916	0.582646	8.1071e-07
CD69	HCP5	hsa-miR-21-5p	0.746562	0.565038	0.181524	1.42171e-17
CD69	MIR155HG	hsa-miR-103a-3p	0.731595	0.608045	0.12355	7.22585e-08
CD69	MIR155HG	hsa-miR-142-5p	0.731595	0.239086	0.492509	8.1071e-07
CD69	MIR155HG	hsa-miR-21-5p	0.731595	0.595499	0.136096	1.42171e-17
CD80	HCP5	hsa-miR-146a-5p	0.681437	0.511869	0.169568	1.58824e-06
CD80	MIR155HG	hsa-miR-146a-5p	0.667427	0.537864	0.129564	1.58824e-06
CDC25B	MIR155HG	hsa-miR-27a-3p	0.629375	0.440313	0.189062	7.57864e-21
CDC25B	SNHG12	hsa-miR-27a-3p	0.663914	0.447004	0.21691	7.57864e-21
CDC42EP3	EGOT	hsa-miR-27a-3p	0.716898	0.588494	0.128404	7.57864e-21
CDH11	MIAT	hsa-miR-874-3p	0.74295	0.59009	0.15286	8.03837e-11
CDK5R1	MIR155HG	hsa-miR-150-5p	0.661382	0.556935	0.104448	0.000903287
CDK5R1	MIR155HG	hsa-miR-199a-3p	0.661382	0.508503	0.152879	0.208452
CDK5R1	MIR155HG	hsa-miR-199b-3p	0.661382	0.508528	0.152855	0.209323
CDON	CASC2	hsa-miR-146b-5p	0.722772	0.612829	0.109944	0.00245635
CDON	CASC2	hsa-miR-27a-3p	0.722772	0.535297	0.187475	7.57864e-21
CDON	LOH12CR2	hsa-miR-146b-5p	0.718725	0.541455	0.17727	0.00245635
CELF2	MIAT	hsa-miR-103a-3p	0.663202	0.513586	0.149616	7.22585e-08
CELF2	MIAT	hsa-miR-30a-5p	0.663202	0.482104	0.181098	3.63917e-19
CELSR3	MIAT	hsa-miR-30a-5p	0.63328	0.435356	0.197924	3.63917e-19
CIITA	EGOT	hsa-miR-142-3p	0.676037	0.399516	0.27652	9.58161e-10
CIITA	HCP5	hsa-miR-142-3p	0.906614	0.704768	0.201846	9.58161e-10
CIITA	MIR155HG	hsa-miR-142-3p	0.729009	0.237296	0.491713	9.58161e-10
CLYBL	LOH12CR2	hsa-miR-139-5p	0.636672	0.478931	0.157741	4.9401e-08
CNIH4	GAS5	hsa-miR-152-3p	0.627402	0.518272	0.10913	7.19902e-05
COL25A1	LOH12CR2	hsa-miR-30a-5p	0.636295	0.485795	0.1505	3.63917e-19
COL25A1	LOH12CR2	hsa-miR-30c-5p	0.636295	0.393623	0.242673	1.99469e-08
COLEC10	CASC2	hsa-miR-23a-3p	0.646733	0.439543	0.20719	1.00416e-18
COLEC10	LOH12CR2	hsa-miR-23a-3p	0.630782	0.425153	0.205629	1.00416e-18
COX15	CASC2	hsa-miR-23a-3p	0.721358	0.608527	0.112831	1.00416e-18
COX15	LOH12CR2	hsa-miR-204-5p	0.665944	0.55662	0.109324	6.22777e-25
COX15	LOH12CR2	hsa-miR-23a-3p	0.665944	0.534237	0.131707	1.00416e-18
CRTAM	HCP5	hsa-miR-142-3p	0.801074	0.387436	0.413638	9.58161e-10
CRTAM	MIR155HG	hsa-miR-142-3p	0.758323	0.3432	0.415123	9.58161e-10
CRY2	CASC2	hsa-miR-98-5p	0.706267	0.591362	0.114905	0.000189631
CSAD	MALAT1	hsa-miR-30b-5p	0.671086	0.55559	0.115496	1.01531e-08
CSAD	RMST	hsa-miR-30b-5p	0.650015	0.523271	0.126743	1.01531e-08
CSF1R	HCP5	hsa-miR-155-5p	0.722593	0.373781	0.348812	3.08305e-11
CSF1R	MIR155HG	hsa-miR-155-5p	0.672529	0.201309	0.47122	3.08305e-11
CSF2RB	HCP5	hsa-miR-155-5p	0.760681	0.420708	0.339974	3.08305e-11
CSF2RB	MIR155HG	hsa-miR-155-5p	0.696584	0.198719	0.497865	3.08305e-11
CSTF3	RMST	hsa-miR-181c-5p	0.64085	0.518711	0.122139	0.276595
CSTF3	RMST	hsa-miR-181d-5p	0.64085	0.505556	0.135294	0.118149
CTLA4	EGOT	hsa-miR-155-5p	0.646312	0.500435	0.145877	3.08305e-11
CTLA4	HCP5	hsa-miR-155-5p	0.84688	0.544382	0.302498	3.08305e-11
CTLA4	MIR155HG	hsa-miR-155-5p	0.863743	0.52544	0.338304	3.08305e-11
CXCR5	HCP5	hsa-miR-214-5p	0.723952	0.605402	0.118549	4.89465e-08
CXCR5	HCP5	hsa-miR-215-5p	0.723952	0.617465	0.106487	0.299164
CYB561	LOH12CR2	hsa-miR-30a-5p	0.740022	0.615871	0.124151	3.63917e-19
CYB561	LOH12CR2	hsa-miR-30c-5p	0.740022	0.626662	0.113361	1.99469e-08
CYTIP	HCP5	hsa-miR-150-5p	0.792503	0.309326	0.483177	0.000903287
CYTIP	MIR155HG	hsa-miR-150-5p	0.746649	0.294685	0.451963	0.000903287
DCLK1	HCP5	hsa-miR-135a-5p	0.710633	0.541982	0.168651	3.33834e-10
DCLK1	MIR155HG	hsa-miR-135a-5p	0.625866	0.457458	0.168409	3.33834e-10
DCUN1D4	FAM95B1	hsa-miR-130b-3p	0.642325	0.509877	0.132448	0.000886826
DIO2	LOH12CR2	hsa-miR-30a-5p	0.722046	0.547456	0.17459	3.63917e-19
DIO2	LOH12CR2	hsa-miR-30c-5p	0.722046	0.552818	0.169228	1.99469e-08
DIO2	LOH12CR2	hsa-miR-30e-5p	0.722046	0.57144	0.150605	1.74289e-12
DIRAS1	EGOT	hsa-miR-27a-3p	0.651712	0.531032	0.12068	7.57864e-21
DIRAS1	HCP5	hsa-miR-27a-3p	0.651797	0.530484	0.121314	7.57864e-21
DIRAS2	LOH12CR2	hsa-miR-190a-5p	0.691748	0.566409	0.12534	0.00625364
DNAL1	CASC2	hsa-miR-135a-5p	0.633681	0.507225	0.126456	3.33834e-10
DNAL1	CASC2	hsa-miR-146a-5p	0.633681	0.495412	0.138268	1.58824e-06
DNAL1	CASC2	hsa-miR-204-5p	0.633681	0.520849	0.112832	6.22777e-25
DNAL1	CASC2	hsa-miR-98-5p	0.633681	0.487652	0.146029	0.000189631
DNPEP	HCP5	hsa-miR-146a-5p	0.763376	0.637741	0.125636	1.58824e-06
DNPEP	MIR155HG	hsa-miR-146a-5p	0.638072	0.495913	0.142159	1.58824e-06
DPP6	LOH12CR2	hsa-miR-139-5p	0.649987	0.502889	0.147098	4.9401e-08
DTX3L	HCP5	hsa-miR-135a-5p	0.698461	0.561817	0.136644	3.33834e-10
DUSP19	LOH12CR2	hsa-miR-204-5p	0.637648	0.369734	0.267914	6.22777e-25
E2F2	MIR155HG	hsa-miR-155-5p	0.638716	0.412179	0.226537	3.08305e-11
EBI3	HCP5	hsa-miR-27a-3p	0.788695	0.651026	0.13767	7.57864e-21
EBI3	MIR155HG	hsa-miR-27a-3p	0.730154	0.5923	0.137854	7.57864e-21
ELMO1	LOH12CR2	hsa-miR-30a-5p	0.673952	0.519094	0.154858	3.63917e-19
ELMO1	LOH12CR2	hsa-miR-30c-5p	0.673952	0.442933	0.231019	1.99469e-08
ELMO1	LOH12CR2	hsa-miR-30e-5p	0.673952	0.494668	0.179284	1.74289e-12
EML1	CASC2	hsa-miR-27a-3p	0.701252	0.521126	0.180126	7.57864e-21
EPOR	DNM1P35	hsa-miR-125b-5p	0.623004	0.478713	0.144292	0.000434908
EPOR	RMST	hsa-miR-125b-5p	0.713826	0.604018	0.109809	0.000434908
EPOR	RMST	hsa-miR-338-3p	0.713826	0.59433	0.119497	0.0687422
FADS3	SNHG12	hsa-miR-98-5p	0.63504	0.512427	0.122613	0.000189631
FAM107B	MIAT	hsa-miR-21-5p	0.686508	0.581346	0.105162	1.42171e-17
FAM167A	CASC2	hsa-miR-221-3p	0.636949	0.519762	0.117187	0.00727354
FAM167A	CASC2	hsa-miR-222-3p	0.636949	0.532002	0.104947	0.0346599
FBXL17	CASC2	hsa-miR-23a-3p	0.669992	0.559921	0.110071	1.00416e-18
FGL2	HCP5	hsa-miR-199a-3p	0.637136	0.415172	0.221964	0.208452
FGL2	HCP5	hsa-miR-199b-3p	0.637136	0.414916	0.22222	0.209323
FN1	EGOT	hsa-miR-27a-3p	0.642014	0.447578	0.194437	7.57864e-21
FRMD5	EGOT	hsa-miR-23a-3p	0.758224	0.61506	0.143163	1.00416e-18
FRMD5	HCP5	hsa-miR-142-5p	0.688138	0.575079	0.113059	8.1071e-07
FRMD5	HCP5	hsa-miR-23a-3p	0.688138	0.498091	0.190047	1.00416e-18
FRMD6	MIAT	hsa-miR-30a-5p	0.700682	0.527479	0.173203	3.63917e-19
FST	MIAT	hsa-miR-30a-5p	0.647143	0.534993	0.11215	3.63917e-19
FZD8	LOH12CR2	hsa-miR-204-5p	0.651265	0.379492	0.271773	6.22777e-25
GABRB3	LOH12CR2	hsa-miR-204-5p	0.64618	0.327008	0.319172	6.22777e-25
GATM	LOH12CR2	hsa-miR-30a-5p	0.643092	0.34267	0.300422	3.63917e-19
GATM	LOH12CR2	hsa-miR-30c-5p	0.643092	0.427738	0.215355	1.99469e-08
GATM	LOH12CR2	hsa-miR-30d-5p	0.643092	0.538169	0.104923	0.623725
GATM	LOH12CR2	hsa-miR-30e-5p	0.643092	0.487954	0.155138	1.74289e-12
GBP1	HCP5	hsa-miR-199b-5p	0.726494	0.620305	0.106189	2.65505e-05
GBP2	MIR155HG	hsa-miR-30a-5p	0.653006	0.495389	0.157617	3.63917e-19
GCH1	HCP5	hsa-miR-135a-5p	0.63368	0.432065	0.201615	3.33834e-10
GCH1	MIR155HG	hsa-miR-135a-5p	0.674555	0.535694	0.138861	3.33834e-10
GFI1	HCP5	hsa-miR-142-3p	0.774766	0.199431	0.575335	9.58161e-10
GFI1	MIR155HG	hsa-miR-142-3p	0.750338	0.242748	0.507589	9.58161e-10
GNAI2	MIR155HG	hsa-miR-30a-5p	0.628471	0.444622	0.183848	3.63917e-19
GPAM	CASC2	hsa-miR-27a-3p	0.747688	0.623799	0.123889	7.57864e-21
GPR161	MIAT	hsa-miR-22-3p	0.644509	0.537476	0.107033	0.190076
GPR161	MIAT	hsa-miR-30a-5p	0.644509	0.464662	0.179847	3.63917e-19
GRAP2	MIR155HG	hsa-miR-326	0.675146	0.564202	0.110944	0.0139253
GSTM3	LOH12CR2	hsa-miR-204-5p	0.680643	0.553904	0.126739	6.22777e-25
HLF	CASC2	hsa-miR-103a-3p	0.677055	0.474237	0.202818	7.22585e-08
HLF	CASC2	hsa-miR-148b-3p	0.677055	0.535232	0.141824	0.0979738
HLF	CASC2	hsa-miR-152-3p	0.677055	0.539854	0.137201	7.19902e-05
HLF	CASC2	hsa-miR-98-5p	0.677055	0.56702	0.110035	0.000189631
HLF	LOH12CR2	hsa-miR-103a-3p	0.684966	0.506555	0.178411	7.22585e-08
HLF	LOH12CR2	hsa-miR-30a-5p	0.684966	0.465762	0.219204	3.63917e-19
HLF	LOH12CR2	hsa-miR-30c-5p	0.684966	0.435382	0.249585	1.99469e-08
HLF	LOH12CR2	hsa-miR-30e-5p	0.684966	0.558853	0.126113	1.74289e-12
HNMT	HCP5	hsa-miR-134-5p	0.634499	0.529547	0.104952	0.213626
HNMT	HCP5	hsa-miR-199a-3p	0.634499	0.464226	0.170273	0.208452
HNMT	HCP5	hsa-miR-199b-3p	0.634499	0.463871	0.170628	0.209323
HSP90B1	LOH12CR2	hsa-miR-23a-3p	0.631926	0.468558	0.163368	1.00416e-18
ID4	CASC2	hsa-miR-23a-3p	0.623372	0.488199	0.135173	1.00416e-18
ID4	LOH12CR2	hsa-miR-23a-3p	0.630714	0.502163	0.12855	1.00416e-18
IFNAR2	MIAT	hsa-miR-30a-5p	0.637773	0.381522	0.256251	3.63917e-19
IGDCC3	RMST	hsa-let-7c-5p	0.641477	0.491462	0.150016	0.083832
IGDCC3	RMST	hsa-miR-23b-3p	0.641477	0.511213	0.130264	0.000223995
IKZF1	MIR155HG	hsa-miR-582-5p	0.751585	0.630763	0.120822	0.00010144
IKZF4	TUG1	hsa-miR-130a-3p	0.648162	0.539997	0.108165	2.05074e-17
IL18BP	MIR155HG	hsa-miR-142-5p	0.720532	0.462364	0.258169	8.1071e-07
INHBA	MIAT	hsa-miR-30a-5p	0.70052	0.536129	0.164391	3.63917e-19
INPP5A	RMST	hsa-let-7c-5p	0.670736	0.535982	0.134754	0.083832
INTS3	GHRLOS	hsa-miR-455-3p	0.701029	0.556666	0.144362	1.08739e-05
INTS3	MALAT1	hsa-miR-455-3p	0.630555	0.522366	0.10819	1.08739e-05
IRF9	HCP5	hsa-miR-142-5p	0.666629	0.378431	0.288198	8.1071e-07
IRF9	MIR155HG	hsa-miR-142-5p	0.65567	0.379248	0.276422	8.1071e-07
IRS1	CASC2	hsa-miR-27a-3p	0.681628	0.502122	0.179505	7.57864e-21
ITGA4	HCP5	hsa-miR-199a-5p	0.655027	0.529717	0.12531	0.099654
ITGA4	HCP5	hsa-miR-199b-5p	0.655027	0.449845	0.205182	2.65505e-05
ITGA4	MIAT	hsa-miR-199b-5p	0.693175	0.586315	0.10686	2.65505e-05
ITGA4	MIAT	hsa-miR-30a-5p	0.693175	0.533796	0.159379	3.63917e-19
ITGA4	MIR155HG	hsa-miR-199a-5p	0.682703	0.556982	0.125722	0.099654
ITGA4	MIR155HG	hsa-miR-199b-5p	0.682703	0.525754	0.15695	2.65505e-05
ITGA4	MIR155HG	hsa-miR-30a-5p	0.682703	0.549535	0.133169	3.63917e-19
ITK	HCP5	hsa-miR-155-5p	0.825289	0.486745	0.338544	3.08305e-11
ITK	MIR155HG	hsa-miR-155-5p	0.731405	0.0897005	0.641705	3.08305e-11
JARID2	TUG1	hsa-miR-130a-3p	0.663859	0.527767	0.136092	2.05074e-17
JAZF1	LOH12CR2	hsa-miR-23a-3p	0.662653	0.558226	0.104428	1.00416e-18
KCNQ1	CASC2	hsa-miR-874-3p	0.661533	0.43602	0.225513	8.03837e-11
KCNQ1	LOH12CR2	hsa-miR-874-3p	0.735837	0.533098	0.202739	8.03837e-11
KCTD12	HCP5	hsa-miR-135a-5p	0.653274	0.473364	0.17991	3.33834e-10
KCTD12	HCP5	hsa-miR-142-5p	0.653274	0.342822	0.310452	8.1071e-07
KIAA1755	H19	hsa-miR-214-5p	0.668419	0.433328	0.235092	4.89465e-08
KIAA1755	HCP5	hsa-miR-214-5p	0.65557	0.441766	0.213804	4.89465e-08
KIAA1755	HCP5	hsa-miR-223-3p	0.65557	0.5324	0.123171	0.0562066
KIAA1755	MIR155HG	hsa-miR-214-5p	0.687013	0.549143	0.137871	4.89465e-08
KIT	CASC2	hsa-miR-152-3p	0.644456	0.537525	0.106931	7.19902e-05
KIT	CASC2	hsa-miR-221-3p	0.644456	0.52713	0.117327	0.00727354
KIT	CASC2	hsa-miR-222-3p	0.644456	0.537775	0.106682	0.0346599
KLF15	LOH12CR2	hsa-miR-190a-5p	0.63849	0.532855	0.105634	0.00625364
KLHL6	HCP5	hsa-miR-199b-5p	0.7282	0.605585	0.122615	2.65505e-05
KLHL6	HCP5	hsa-miR-326	0.7282	0.601826	0.126375	0.0139253
KLHL6	MIR155HG	hsa-miR-326	0.752156	0.635504	0.116651	0.0139253
LBR	MIR155HG	hsa-miR-23b-3p	0.642383	0.53363	0.108754	0.000223995
LIFR	CASC2	hsa-miR-21-5p	0.64731	0.413792	0.233518	1.42171e-17
LIFR	CASC2	hsa-miR-221-3p	0.64731	0.542038	0.105272	0.00727354
LIMD2	HCP5	hsa-miR-199a-5p	0.681809	0.572246	0.109563	0.099654
LIMD2	HCP5	hsa-miR-199b-5p	0.681809	0.527823	0.153986	2.65505e-05
LIPT2	LOH12CR2	hsa-miR-204-5p	0.644457	0.498304	0.146153	6.22777e-25
LTB	EGOT	hsa-miR-146a-5p	0.657062	0.503287	0.153775	1.58824e-06
LTB	HCP5	hsa-miR-146a-5p	0.805025	0.687	0.118026	1.58824e-06
MAGI2	CASC2	hsa-miR-27a-3p	0.777867	0.660444	0.117423	7.57864e-21
MAP4K4	MIAT	hsa-miR-30a-5p	0.649374	0.500336	0.149038	3.63917e-19
MAP7D1	HCP5	hsa-miR-23a-3p	0.676548	0.52635	0.150198	1.00416e-18
MAPK10	CASC2	hsa-miR-135a-5p	0.742452	0.613989	0.128463	3.33834e-10
MAPK10	CASC2	hsa-miR-21-5p	0.742452	0.365472	0.37698	1.42171e-17
MAPK10	CASC2	hsa-miR-27a-3p	0.742452	0.564579	0.177873	7.57864e-21
MAPK10	LOH12CR2	hsa-miR-135a-5p	0.672046	0.496855	0.175191	3.33834e-10
MAPK10	RMST	hsa-miR-135a-5p	0.624662	0.263732	0.360929	3.33834e-10
MAPK8IP3	AGAP11	hsa-miR-320b	0.634579	0.528235	0.106343	2.03863e-05
MATN2	CASC2	hsa-miR-21-5p	0.723732	0.442689	0.281043	1.42171e-17
MBD6	MALAT1	hsa-miR-30b-5p	0.645098	0.524201	0.120897	1.01531e-08
MDM4	MALAT1	hsa-miR-130a-3p	0.628923	0.469886	0.159037	2.05074e-17
MDM4	RMST	hsa-miR-130a-3p	0.635256	0.397271	0.237985	2.05074e-17
MDM4	TUG1	hsa-let-7b-5p	0.667679	0.559167	0.108512	0.000257103
MDM4	TUG1	hsa-miR-130a-3p	0.667679	0.524796	0.142883	2.05074e-17
ME1	LOH12CR2	hsa-miR-30a-5p	0.628073	0.455179	0.172894	3.63917e-19
ME1	LOH12CR2	hsa-miR-30c-5p	0.628073	0.403392	0.224681	1.99469e-08
ME1	LOH12CR2	hsa-miR-30e-5p	0.628073	0.500915	0.127158	1.74289e-12
METTL7A	CASC2	hsa-miR-204-5p	0.634045	0.504087	0.129958	6.22777e-25
METTL7A	LOH12CR2	hsa-miR-204-5p	0.663612	0.527227	0.136385	6.22777e-25
MICAL1	MIAT	hsa-miR-30a-5p	0.672774	0.557336	0.115439	3.63917e-19
MLEC	CASC2	hsa-miR-148b-3p	0.714376	0.551706	0.16267	0.0979738
MLEC	CASC2	hsa-miR-152-3p	0.714376	0.598502	0.115874	7.19902e-05
MLEC	CASC2	hsa-miR-31-5p	0.714376	0.58674	0.127636	5.70935e-05
MLLT3	CASC2	hsa-miR-204-5p	0.659353	0.494883	0.16447	6.22777e-25
MLLT3	LOH12CR2	hsa-miR-204-5p	0.651705	0.433809	0.217895	6.22777e-25
MOCS2	CASC2	hsa-miR-204-5p	0.661848	0.522619	0.139229	6.22777e-25
MOCS2	LOH12CR2	hsa-miR-204-5p	0.706733	0.562997	0.143736	6.22777e-25
MPEG1	HCP5	hsa-miR-155-5p	0.634379	0.17	0.464379	3.08305e-11
MPEG1	MIR155HG	hsa-miR-155-5p	0.682756	0.227484	0.455272	3.08305e-11
MPPED2	CASC2	hsa-miR-148b-3p	0.673782	0.545331	0.128451	0.0979738
MPPED2	CASC2	hsa-miR-152-3p	0.673782	0.541699	0.132084	7.19902e-05
MUC21	HCP5	hsa-miR-199b-5p	0.712379	0.580166	0.132213	2.65505e-05
MYBL1	MIR155HG	hsa-miR-155-5p	0.778471	0.57131	0.207161	3.08305e-11
MYO9B	MIR155HG	hsa-miR-582-5p	0.657109	0.539937	0.117172	0.00010144
NAA40	C1orf220	hsa-miR-204-5p	0.646375	0.53258	0.113795	6.22777e-25
NAA40	FAM95B1	hsa-miR-204-5p	0.670044	0.53716	0.132884	6.22777e-25
NBL1	SNHG12	hsa-miR-199b-5p	0.629403	0.522288	0.107115	2.65505e-05
NDRG2	LOH12CR2	hsa-miR-139-5p	0.718168	0.569216	0.148952	4.9401e-08
NECAP2	HCP5	hsa-miR-27a-3p	0.668254	0.551172	0.117082	7.57864e-21
NFIA	CASC2	hsa-miR-103a-3p	0.644568	0.429018	0.21555	7.22585e-08
NFIA	CASC2	hsa-miR-139-5p	0.644568	0.45219	0.192378	4.9401e-08
NFIA	CASC2	hsa-miR-21-5p	0.644568	0.306993	0.337575	1.42171e-17
NFKBID	SNHG12	hsa-miR-27a-3p	0.635416	0.491251	0.144164	7.57864e-21
NRIP1	MIAT	hsa-miR-30a-5p	0.648042	0.478666	0.169376	3.63917e-19
NYNRIN	KCNQ1OT1	hsa-miR-362-5p	0.63091	0.522809	0.108102	0.0309609
OLR1	EGOT	hsa-miR-21-5p	0.690162	0.363619	0.326543	1.42171e-17
OLR1	HCP5	hsa-miR-21-5p	0.7059	0.431915	0.273984	1.42171e-17
PAN3	MALAT1	hsa-miR-130a-3p	0.622879	0.46442	0.158459	2.05074e-17
PAN3	MALAT1	hsa-miR-320b	0.622879	0.49748	0.125399	2.03863e-05
PARP12	HCP5	hsa-miR-199b-5p	0.667435	0.530626	0.13681	2.65505e-05
PARP12	MIR155HG	hsa-miR-199b-5p	0.702016	0.592725	0.109291	2.65505e-05
PAX8	CASC2	hsa-miR-214-5p	0.65216	0.538518	0.113642	4.89465e-08
PCGF3	MALAT1	hsa-miR-320b	0.664543	0.558901	0.105642	2.03863e-05
PDCD4	RMST	hsa-miR-150-5p	0.657814	0.549978	0.107836	0.000903287
PDCD4	RMST	hsa-miR-23b-3p	0.657814	0.481618	0.176197	0.000223995
PDE3B	HCP5	hsa-miR-103a-3p	0.68646	0.550633	0.135827	7.22585e-08
PDE3B	HCP5	hsa-miR-135a-5p	0.68646	0.53185	0.15461	3.33834e-10
PDE3B	HCP5	hsa-miR-214-5p	0.68646	0.531488	0.154972	4.89465e-08
PDE3B	HCP5	hsa-miR-223-3p	0.68646	0.545451	0.141009	0.0562066
PDE3B	MIR155HG	hsa-miR-103a-3p	0.695574	0.56386	0.131714	7.22585e-08
PDE3B	MIR155HG	hsa-miR-135a-5p	0.695574	0.57546	0.120113	3.33834e-10
PDE3B	MIR155HG	hsa-miR-214-5p	0.695574	0.569491	0.126083	4.89465e-08
PDE3B	MIR155HG	hsa-miR-23b-3p	0.695574	0.587152	0.108422	0.000223995
PDE8A	CASC2	hsa-miR-142-3p	0.639	0.527046	0.111954	9.58161e-10
PDLIM2	MIR155HG	hsa-miR-27a-3p	0.647972	0.510466	0.137506	7.57864e-21
PDLIM2	SNHG12	hsa-miR-27a-3p	0.704019	0.570673	0.133346	7.57864e-21
PDZD4	HAR1A	hsa-miR-218-5p	0.630194	0.523032	0.107161	0.0304617
PDZK1IP1	EGOT	hsa-miR-27a-3p	0.761817	0.59733	0.164487	7.57864e-21
PDZK1IP1	HCP5	hsa-miR-27a-3p	0.656088	0.412892	0.243195	7.57864e-21
PERP	EGOT	hsa-miR-204-5p	0.626692	0.490654	0.136037	6.22777e-25
PHC1	MALAT1	hsa-miR-320b	0.644734	0.538782	0.105952	2.03863e-05
PI4K2A	HCP5	hsa-miR-204-5p	0.654077	0.547138	0.106939	6.22777e-25
PIK3CD	MIAT	hsa-miR-30a-5p	0.683299	0.501917	0.181382	3.63917e-19
PIK3CD	MIR155HG	hsa-miR-30a-5p	0.731954	0.612805	0.119149	3.63917e-19
PIK3R6	MIR155HG	hsa-miR-142-3p	0.702117	0.395664	0.306452	9.58161e-10
PIM2	HCP5	hsa-miR-135a-5p	0.803087	0.698209	0.104878	3.33834e-10
PKIA	CASC2	hsa-miR-103a-3p	0.63198	0.525099	0.106881	7.22585e-08
PKIA	CASC2	hsa-miR-23a-3p	0.63198	0.488563	0.143417	1.00416e-18
PKIA	CASC2	hsa-miR-27a-3p	0.63198	0.491882	0.140098	7.57864e-21
PKIA	CASC2	hsa-miR-98-5p	0.63198	0.442969	0.18901	0.000189631
PKNOX2	LOH12CR2	hsa-miR-30c-5p	0.626484	0.375819	0.250665	1.99469e-08
PKNOX2	LOH12CR2	hsa-miR-30e-5p	0.626484	0.498873	0.12761	1.74289e-12
PMAIP1	EGOT	hsa-miR-142-3p	0.671943	0.528045	0.143898	9.58161e-10
PODNL1	MIAT	hsa-miR-328-3p	0.626312	0.504214	0.122098	0.0165239
PODNL1	MIAT	hsa-miR-874-3p	0.626312	0.433475	0.192837	8.03837e-11
POGZ	MIR17HG	hsa-let-7b-5p	0.636429	0.532027	0.104402	0.000257103
POLI	CASC2	hsa-miR-204-5p	0.744613	0.621219	0.123393	6.22777e-25
POLI	FAM95B1	hsa-miR-204-5p	0.6328	0.483164	0.149636	6.22777e-25
POU2F2	HCP5	hsa-miR-214-5p	0.675305	0.539669	0.135636	4.89465e-08
POU2F2	MIR155HG	hsa-miR-582-5p	0.773093	0.666956	0.106137	0.00010144
PPP1R13B	LOH12CR2	hsa-miR-23a-3p	0.678167	0.571739	0.106428	1.00416e-18
PRDM8	HCP5	hsa-miR-142-5p	0.687166	0.270847	0.416319	8.1071e-07
PRDM8	MIR155HG	hsa-miR-142-5p	0.746805	0.455582	0.291223	8.1071e-07
PRPS1	LOH12CR2	hsa-miR-23a-3p	0.627898	0.509577	0.118322	1.00416e-18
PSPH	LOH12CR2	hsa-miR-139-5p	0.628202	0.519272	0.10893	4.9401e-08
PTBP2	KCNQ1OT1	hsa-miR-130a-3p	0.668606	0.491039	0.177567	2.05074e-17
PTBP2	MALAT1	hsa-miR-130a-3p	0.636872	0.447373	0.189498	2.05074e-17
PTBP2	RMST	hsa-miR-130a-3p	0.732267	0.478411	0.253856	2.05074e-17
PTBP2	TUG1	hsa-miR-130a-3p	0.667347	0.49704	0.170307	2.05074e-17
PTPN4	CASC2	hsa-miR-103a-3p	0.627007	0.510813	0.116194	7.22585e-08
PTPN4	CASC2	hsa-miR-139-5p	0.627007	0.517566	0.109441	4.9401e-08
PTPN4	CASC2	hsa-miR-23a-3p	0.627007	0.469755	0.157253	1.00416e-18
PXMP4	CASC2	hsa-miR-98-5p	0.661238	0.486973	0.174265	0.000189631
RAB11FIP1	EGOT	hsa-miR-27a-3p	0.676934	0.513132	0.163802	7.57864e-21
RAB35	HCP5	hsa-miR-96-5p	0.624014	0.512426	0.111588	0.00655845
RAP2B	HCP5	hsa-miR-103a-3p	0.634601	0.448286	0.186315	7.22585e-08
RAP2B	HCP5	hsa-miR-23a-3p	0.634601	0.505408	0.129193	1.00416e-18
RAP2B	HCP5	hsa-miR-27a-3p	0.634601	0.437257	0.197344	7.57864e-21
RAPGEFL1	DNM1P35	hsa-miR-125b-5p	0.622769	0.467667	0.155102	0.000434908
RASGRP1	MIR155HG	hsa-miR-21-5p	0.706573	0.580418	0.126155	1.42171e-17
RASSF2	MIR155HG	hsa-miR-199a-5p	0.662361	0.50886	0.153501	0.099654
RASSF2	MIR155HG	hsa-miR-199b-5p	0.662361	0.498899	0.163462	2.65505e-05
RASSF5	HCP5	hsa-miR-27a-3p	0.70883	0.561484	0.147346	7.57864e-21
RBM20	FAM95B1	hsa-miR-130b-3p	0.624129	0.480264	0.143865	0.000886826
RBM20	RMST	hsa-miR-130a-3p	0.716295	0.562631	0.153664	2.05074e-17
RBM25	MIR17HG	hsa-miR-130a-3p	0.624989	0.507598	0.117392	2.05074e-17
RBM25	TUG1	hsa-miR-130a-3p	0.735265	0.630178	0.105087	2.05074e-17
RELT	MIR155HG	hsa-miR-27a-3p	0.679427	0.570513	0.108914	7.57864e-21
ROBO1	MIAT	hsa-let-7b-5p	0.640687	0.535396	0.10529	0.000257103
RSAD2	HCP5	hsa-miR-21-5p	0.634617	0.389496	0.245121	1.42171e-17
RSPO3	MIR155HG	hsa-miR-103a-3p	0.642149	0.523798	0.118351	7.22585e-08
RTN1	HCP5	hsa-miR-142-5p	0.642788	0.11139	0.531398	8.1071e-07
RUFY3	RMST	hsa-miR-125b-5p	0.638427	0.514134	0.124293	0.000434908
RUFY3	RMST	hsa-miR-27b-3p	0.638427	0.527273	0.111154	0.213455
S100A10	EGOT	hsa-miR-21-5p	0.638601	-0.00933768	0.647938	1.42171e-17
S100A10	HCP5	hsa-miR-21-5p	0.647249	0.127949	0.519299	1.42171e-17
S100A10	SNHG12	hsa-miR-21-5p	0.701259	0.437874	0.263385	1.42171e-17
SCN9A	MIAT	hsa-miR-30a-5p	0.633627	0.397251	0.236375	3.63917e-19
SEL1L3	MIAT	hsa-miR-103a-3p	0.64911	0.488065	0.161044	7.22585e-08
SEL1L3	MIAT	hsa-miR-30a-5p	0.64911	0.434589	0.214521	3.63917e-19
SEMA7A	MIR155HG	hsa-miR-27a-3p	0.698655	0.573008	0.125647	7.57864e-21
SFXN2	CASC2	hsa-miR-204-5p	0.674205	0.550248	0.123957	6.22777e-25
SFXN2	CASC2	hsa-miR-27a-3p	0.674205	0.490488	0.183717	7.57864e-21
SGIP1	FAM95B1	hsa-miR-204-5p	0.679685	0.560256	0.11943	6.22777e-25
SH3BP1	MIAT	hsa-miR-31-5p	0.656979	0.538799	0.118181	5.70935e-05
SHANK2	CASC2	hsa-miR-190a-5p	0.659129	0.541156	0.117973	0.00625364
SLAMF8	HCP5	hsa-miR-199b-5p	0.812677	0.706452	0.106225	2.65505e-05
SLAMF8	MIR155HG	hsa-miR-199b-5p	0.729839	0.601483	0.128356	2.65505e-05
SLC20A1	EGOT	hsa-miR-27a-3p	0.622662	0.459411	0.163251	7.57864e-21
SLC25A34	RMST	hsa-miR-30b-5p	0.753909	0.646349	0.10756	1.01531e-08
SLC39A11	LOH12CR2	hsa-miR-204-5p	0.626147	0.440481	0.185665	6.22777e-25
SLC39A11	LOH12CR2	hsa-miR-30a-5p	0.626147	0.49964	0.126507	3.63917e-19
SLC39A11	LOH12CR2	hsa-miR-30c-5p	0.626147	0.498411	0.127736	1.99469e-08
SLC39A11	LOH12CR2	hsa-miR-30e-5p	0.626147	0.508922	0.117225	1.74289e-12
SLC39A13	SNHG12	hsa-miR-27a-3p	0.640053	0.525053	0.115	7.57864e-21
SLC43A1	LOH12CR2	hsa-miR-204-5p	0.629455	0.421225	0.208231	6.22777e-25
SLC4A4	CASC2	hsa-miR-204-5p	0.708098	0.526701	0.181398	6.22777e-25
SLC4A4	CASC2	hsa-miR-23a-3p	0.708098	0.584018	0.124081	1.00416e-18
SLC4A4	LOH12CR2	hsa-miR-204-5p	0.70805	0.417853	0.290197	6.22777e-25
SLC4A4	LOH12CR2	hsa-miR-23a-3p	0.70805	0.588125	0.119926	1.00416e-18
SLFN12L	HCP5	hsa-miR-23a-3p	0.752881	0.647415	0.105466	1.00416e-18
SNX10	MIR155HG	hsa-miR-30a-5p	0.700195	0.594023	0.106171	3.63917e-19
SOX4	MIAT	hsa-miR-30a-5p	0.657666	0.430994	0.226672	3.63917e-19
SPATA2	CASC2	hsa-miR-135a-5p	0.636166	0.525769	0.110397	3.33834e-10
SPATA2	CASC2	hsa-miR-27a-3p	0.636166	0.461332	0.174833	7.57864e-21
SPATA2	CASC2	hsa-miR-335-5p	0.636166	0.525544	0.110622	0.0177953
SPI1	HCP5	hsa-miR-155-5p	0.787608	0.456176	0.331432	3.08305e-11
SPI1	MIR155HG	hsa-miR-155-5p	0.813512	0.478953	0.334559	3.08305e-11
SPRY4	KCNQ1OT1	hsa-miR-130a-3p	0.637574	0.522699	0.114875	2.05074e-17
SPRY4	RMST	hsa-miR-130a-3p	0.636662	0.495338	0.141324	2.05074e-17
SPTBN4	CASC2	hsa-miR-103a-3p	0.659661	0.535213	0.124448	7.22585e-08
STAC	EGOT	hsa-miR-27a-3p	0.625555	0.389992	0.235562	7.57864e-21
STAT1	EGOT	hsa-miR-23a-3p	0.623613	0.45062	0.172993	1.00416e-18
STAT1	EGOT	hsa-miR-27a-3p	0.623613	0.473124	0.150489	7.57864e-21
STAT1	HCP5	hsa-miR-150-5p	0.832345	0.660311	0.172033	0.000903287
STAT5A	HCP5	hsa-miR-23a-3p	0.657606	0.536464	0.121141	1.00416e-18
STK17B	MIR155HG	hsa-miR-30a-5p	0.657857	0.493217	0.16464	3.63917e-19
STK38	HCP5	hsa-miR-142-5p	0.623616	0.386868	0.236748	8.1071e-07
STK38	MIR155HG	hsa-miR-142-5p	0.647788	0.441716	0.206072	8.1071e-07
STOML1	LOH12CR2	hsa-miR-30a-5p	0.649727	0.517255	0.132472	3.63917e-19
STOML1	LOH12CR2	hsa-miR-30e-5p	0.649727	0.533242	0.116485	1.74289e-12
STOML1	LOH12CR2	hsa-miR-874-3p	0.649727	0.49161	0.158117	8.03837e-11
STXBP5L	CASC2	hsa-miR-139-5p	0.724915	0.576197	0.148718	4.9401e-08
STXBP5L	LOH12CR2	hsa-miR-139-5p	0.756905	0.593207	0.163698	4.9401e-08
STYK1	MIR155HG	hsa-miR-27a-3p	0.624505	0.470205	0.154301	7.57864e-21
SUN2	HCP5	hsa-miR-103a-3p	0.655337	0.492623	0.162714	7.22585e-08
SYNGR3	MIAT	hsa-miR-30a-5p	0.628002	0.390046	0.237956	3.63917e-19
SYNGR3	MIR155HG	hsa-miR-30a-5p	0.723843	0.593672	0.130171	3.63917e-19
SYT1	EGOT	hsa-miR-135a-5p	0.649144	0.498682	0.150462	3.33834e-10
SYT1	EGOT	hsa-miR-27a-3p	0.649144	0.453388	0.195756	7.57864e-21
SYT2	MIR17HG	hsa-let-7b-5p	0.648328	0.543227	0.105102	0.000257103
TAGAP	HCP5	hsa-miR-142-3p	0.768624	0.338555	0.430069	9.58161e-10
TAGAP	MIR155HG	hsa-miR-142-3p	0.671465	0.15488	0.516585	9.58161e-10
TAGAP	MIR155HG	hsa-miR-21-5p	0.671465	0.560272	0.111193	1.42171e-17
TCF3	MIAT	hsa-miR-139-5p	0.625919	0.512135	0.113784	4.9401e-08
TCF7L1	LOH12CR2	hsa-miR-204-5p	0.631216	0.324284	0.306932	6.22777e-25
TEX261	CASC2	hsa-miR-31-5p	0.642684	0.536221	0.106463	5.70935e-05
TEX261	CASC2	hsa-miR-98-5p	0.642684	0.487034	0.155651	0.000189631
TFPI2	MIR155HG	hsa-miR-23b-3p	0.643173	0.489166	0.154007	0.000223995
TG	LOH12CR2	hsa-miR-204-5p	0.630305	0.506291	0.124014	6.22777e-25
THAP9	CASC2	hsa-miR-98-5p	0.63535	0.495419	0.139931	0.000189631
TIGIT	EGOT	hsa-miR-23a-3p	0.651258	0.487587	0.163671	1.00416e-18
TIMP2	MIAT	hsa-miR-30a-5p	0.623667	0.441011	0.182656	3.63917e-19
TMEM135	CASC2	hsa-miR-139-5p	0.706512	0.595664	0.110848	4.9401e-08
TMEM135	CASC2	hsa-miR-23a-3p	0.706512	0.534327	0.172186	1.00416e-18
TMEM164	CASC2	hsa-miR-148b-3p	0.684238	0.539324	0.144914	0.0979738
TMEM164	CASC2	hsa-miR-152-3p	0.684238	0.569794	0.114444	7.19902e-05
TMEM164	CASC2	hsa-miR-204-5p	0.684238	0.48531	0.198928	6.22777e-25
TMEM164	LOH12CR2	hsa-miR-204-5p	0.727349	0.465657	0.261692	6.22777e-25
TMEM220	CASC2	hsa-miR-31-5p	0.680957	0.542364	0.138593	5.70935e-05
TMEM220	LOH12CR2	hsa-miR-30a-5p	0.716295	0.550989	0.165306	3.63917e-19
TMEM220	LOH12CR2	hsa-miR-30c-5p	0.716295	0.503129	0.213166	1.99469e-08
TMEM220	LOH12CR2	hsa-miR-30e-5p	0.716295	0.580903	0.135392	1.74289e-12
TMSB10	SLC22A18AS	hsa-miR-152-3p	0.626988	0.469236	0.157752	7.19902e-05
TMSB10	SNHG12	hsa-miR-27a-3p	0.758054	0.615832	0.142222	7.57864e-21
TNFAIP3	HCP5	hsa-miR-142-5p	0.623151	-0.0228991	0.64605	8.1071e-07
TNFRSF8	MIAT	hsa-miR-30a-5p	0.630804	0.465934	0.164869	3.63917e-19
TNRC6A	MALAT1	hsa-miR-130a-3p	0.673859	0.552687	0.121172	2.05074e-17
TNRC6A	RMST	hsa-miR-130a-3p	0.647821	0.465645	0.182176	2.05074e-17
TRAF1	HCP5	hsa-miR-142-5p	0.650989	0.152381	0.498608	8.1071e-07
TRAF1	MIR155HG	hsa-miR-142-5p	0.794553	0.545372	0.249181	8.1071e-07
TROAP	SNHG1	hsa-miR-106b-5p	0.65659	0.531606	0.124984	0.0864167
TSC1	KCNQ1OT1	hsa-miR-130a-3p	0.624223	0.492322	0.131902	2.05074e-17
TSC1	TUG1	hsa-miR-130a-3p	0.677765	0.567202	0.110563	2.05074e-17
TSPAN33	LOH12CR2	hsa-miR-30c-5p	0.644646	0.539183	0.105463	1.99469e-08
TSPAN33	LOH12CR2	hsa-miR-30e-5p	0.644646	0.486047	0.158599	1.74289e-12
TTC39C	MIR155HG	hsa-miR-142-5p	0.643408	0.28943	0.353978	8.1071e-07
TWIST1	H19	hsa-miR-214-5p	0.661465	0.46349	0.197974	4.89465e-08
UBE2O	CASC2	hsa-miR-23a-3p	0.647985	0.457602	0.190383	1.00416e-18
UNKL	RMST	hsa-miR-181d-5p	0.652735	0.512161	0.140574	0.118149
VASH2	MIAT	hsa-miR-21-5p	0.667448	0.528568	0.138881	1.42171e-17
VCAN	H19	hsa-miR-136-5p	0.744972	0.484311	0.260661	0.418332
WASF3	CASC2	hsa-miR-103a-3p	0.717316	0.598897	0.118419	7.22585e-08
WASF3	CASC2	hsa-miR-146b-5p	0.717316	0.609397	0.107919	0.00245635
WASF3	LOH12CR2	hsa-miR-103a-3p	0.642754	0.498777	0.143977	7.22585e-08
WASF3	LOH12CR2	hsa-miR-146b-5p	0.642754	0.457158	0.185596	0.00245635
WASF3	LOH12CR2	hsa-miR-23a-3p	0.642754	0.524925	0.117829	1.00416e-18
WDFY4	HCP5	hsa-miR-103a-3p	0.777143	0.652024	0.125119	7.22585e-08
WDFY4	MIR155HG	hsa-miR-103a-3p	0.804441	0.694615	0.109825	7.22585e-08
WIPF1	HCP5	hsa-miR-135a-5p	0.74447	0.603252	0.141218	3.33834e-10
WIPF1	MIR155HG	hsa-miR-30a-5p	0.758232	0.650502	0.10773	3.63917e-19
WNT4	LOH12CR2	hsa-miR-204-5p	0.654756	0.266869	0.387887	6.22777e-25
YWHAH	HCP5	hsa-miR-103a-3p	0.68575	0.565158	0.120592	7.22585e-08
ZNF711	KCNQ1OT1	hsa-miR-130a-3p	0.713007	0.589214	0.123792	2.05074e-17
ZNF711	RMST	hsa-miR-130a-3p	0.651577	0.433483	0.218094	2.05074e-17
ZNF711	TUG1	hsa-miR-130a-3p	0.73234	0.620703	0.111637	2.05074e-17
ZNF831	HCP5	hsa-miR-142-3p	0.763721	0.233994	0.529727	9.58161e-10
ZNF831	HCP5	hsa-miR-142-5p	0.763721	0.161737	0.601984	8.1071e-07
ZNF831	MIR155HG	hsa-miR-142-3p	0.761596	0.32747	0.434125	9.58161e-10
ZNF831	MIR155HG	hsa-miR-142-5p	0.761596	0.292263	0.469333	8.1071e-07
