# Supplementary material for: SPINNAKER: an R-based tool to highlight key RNA interactions in complex biological networks
Source: BMC Bioinformatics. 2022 May 6;23:166. doi: 10.1186/s12859-022-04695-x (PMC9073480; doi:10.1186/s12859-022-04695-x)
Supplement: Supplementary file 4 — Additional file 4: ceRNA interaction network obtained by running SPINNAKER on breast cancer dataset. [file 12859_2022_4695_MOESM4_ESM.xlsx]

## Sheet: ceRNA_network_pval
ceRNA1	ceRNA2	miRNA	correlation	partial_correlation	sensitivity	p_value
ABAT	EGOT	hsa-miR-200b-3p	0.723733	0.378208	0.345525	9.55305e-89
ABAT	EGOT	hsa-miR-200c-3p	0.723733	0.3842	0.339533	4.5866e-81
ABCA1	EMX2OS	hsa-miR-200b-3p	0.750324	0.493991	0.256334	9.55305e-89
ABCC9	H19	hsa-miR-200b-3p	0.698159	0.395393	0.302766	9.55305e-89
ABCC9	H19	hsa-miR-200c-3p	0.698159	0.431533	0.266626	4.5866e-81
ABI2	EGOT	hsa-miR-200b-3p	0.81511	0.401184	0.413927	9.55305e-89
ABI2	EGOT	hsa-miR-200c-3p	0.81511	0.415847	0.399263	4.5866e-81
ABI2	EGOT	hsa-miR-205-5p	0.81511	0.530219	0.284892	4.24144e-50
ABI2	FAM66C	hsa-miR-200b-3p	0.819644	0.544121	0.275523	9.55305e-89
ABI2	FAM66C	hsa-miR-200c-3p	0.819644	0.546277	0.273367	4.5866e-81
ABI2	PART1	hsa-miR-200b-3p	0.774807	0.127118	0.64769	9.55305e-89
ABI2	PART1	hsa-miR-200c-3p	0.774807	0.188392	0.586415	4.5866e-81
ABI2	PART1	hsa-miR-205-5p	0.774807	0.491132	0.283675	4.24144e-50
ABI2	PART1	hsa-miR-429	0.774807	0.437099	0.337708	4.58741e-17
ABI2	PVT1	hsa-miR-200b-3p	0.811366	0.271848	0.539518	9.55305e-89
ABI2	PVT1	hsa-miR-200c-3p	0.811366	0.292546	0.51882	4.5866e-81
ABI2	PVT1	hsa-miR-205-5p	0.811366	0.54357	0.267797	4.24144e-50
ABI2	SNHG1	hsa-miR-200b-3p	0.706812	0.413597	0.293215	9.55305e-89
ABI2	SNHG1	hsa-miR-200c-3p	0.706812	0.425266	0.281546	4.5866e-81
ABI2	SNHG1	hsa-miR-205-5p	0.706812	0.442495	0.264317	4.24144e-50
ACO1	EMX2OS	hsa-miR-200a-3p	0.810202	0.544723	0.265479	2.27304e-92
ACO1	H19	hsa-miR-141-3p	0.705065	0.416859	0.288206	2.2947e-75
ACO1	H19	hsa-miR-200a-3p	0.705065	0.379714	0.325351	2.27304e-92
ACVRL1	EMX2OS	hsa-miR-22-3p	0.740912	0.438231	0.302681	9.02349e-28
ACVRL1	H19	hsa-miR-22-3p	0.764477	0.409918	0.354559	9.02349e-28
ADIPOR2	EMX2OS	hsa-miR-200b-3p	0.700628	0.384175	0.316453	9.55305e-89
ADIPOR2	EMX2OS	hsa-miR-200c-3p	0.700628	0.420971	0.279657	4.5866e-81
ADRB1	EMX2OS	hsa-miR-200a-3p	0.725494	0.468525	0.256969	2.27304e-92
AFF3	EGOT	hsa-miR-200b-3p	0.700379	0.289898	0.410481	9.55305e-89
AFF3	EGOT	hsa-miR-200c-3p	0.700379	0.301913	0.398466	4.5866e-81
AFF3	EGOT	hsa-miR-205-5p	0.700379	0.422229	0.278149	4.24144e-50
ANK3	EGOT	hsa-miR-200b-3p	0.752161	0.229112	0.52305	9.55305e-89
ANK3	EGOT	hsa-miR-200c-3p	0.752161	0.270542	0.481619	4.5866e-81
ANK3	HCG18	hsa-miR-200b-3p	0.69941	0.361704	0.337706	9.55305e-89
ANK3	HCG18	hsa-miR-200c-3p	0.69941	0.391643	0.307767	4.5866e-81
ANK3	PART1	hsa-miR-200b-3p	0.722745	-0.0226841	0.745429	9.55305e-89
ANK3	PART1	hsa-miR-200c-3p	0.722745	0.0803458	0.642399	4.5866e-81
ANK3	PART1	hsa-miR-429	0.722745	0.281914	0.440831	4.58741e-17
ANK3	PVT1	hsa-miR-200b-3p	0.744648	0.0606242	0.684023	9.55305e-89
ANK3	PVT1	hsa-miR-200c-3p	0.744648	0.119331	0.625316	4.5866e-81
ANKRD13A	GAS5	hsa-miR-22-3p	0.699322	0.432324	0.266998	9.02349e-28
ANKRD13A	SNHG1	hsa-miR-22-3p	0.72788	0.480629	0.247251	9.02349e-28
ANO6	EMX2OS	hsa-miR-200a-3p	0.78286	0.529849	0.253011	2.27304e-92
ARHGAP19	DGCR5	hsa-miR-200b-3p	0.708553	0.250506	0.458047	9.55305e-89
ARHGAP19	DGCR5	hsa-miR-200c-3p	0.708553	0.237584	0.47097	4.5866e-81
ARHGAP19	DNM1P35	hsa-miR-200b-3p	0.703887	0.378613	0.325273	9.55305e-89
ARHGAP19	DNM1P35	hsa-miR-200c-3p	0.703887	0.389755	0.314132	4.5866e-81
ARHGAP19	EGOT	hsa-miR-200b-3p	0.835451	0.487419	0.348032	9.55305e-89
ARHGAP19	EGOT	hsa-miR-200c-3p	0.835451	0.476311	0.35914	4.5866e-81
ARHGAP19	FAM66C	hsa-miR-200b-3p	0.741321	0.346674	0.394647	9.55305e-89
ARHGAP19	FAM66C	hsa-miR-200c-3p	0.741321	0.335527	0.405794	4.5866e-81
ARHGAP19	PART1	hsa-miR-200b-3p	0.75415	0.0945082	0.659642	9.55305e-89
ARHGAP19	PART1	hsa-miR-200c-3p	0.75415	0.104272	0.649878	4.5866e-81
ARHGAP19	PART1	hsa-miR-429	0.75415	0.401336	0.352814	4.58741e-17
ARHGAP19	PVT1	hsa-miR-200b-3p	0.800039	0.268865	0.531174	9.55305e-89
ARHGAP19	PVT1	hsa-miR-200c-3p	0.800039	0.240182	0.559857	4.5866e-81
ARHGAP24	EMX2OS	hsa-miR-141-3p	0.768259	0.505803	0.262456	2.2947e-75
ARHGAP24	EMX2OS	hsa-miR-200a-3p	0.768259	0.463991	0.304268	2.27304e-92
ARRDC3	PVT1	hsa-miR-200b-3p	0.705599	0.388581	0.317018	9.55305e-89
ARRDC3	PVT1	hsa-miR-200c-3p	0.705599	0.453416	0.252183	4.5866e-81
ATP1B1	EGOT	hsa-miR-141-3p	0.795455	0.547989	0.247466	2.2947e-75
ATP1B1	EGOT	hsa-miR-200a-3p	0.795455	0.504509	0.290946	2.27304e-92
ATP1B1	PART1	hsa-miR-141-3p	0.708425	0.279047	0.429377	2.2947e-75
ATP1B1	PART1	hsa-miR-200a-3p	0.708425	0.204279	0.504146	2.27304e-92
ATP1B1	PVT1	hsa-miR-141-3p	0.777913	0.460509	0.317404	2.2947e-75
ATP1B1	PVT1	hsa-miR-200a-3p	0.777913	0.372555	0.405358	2.27304e-92
AUTS2	DGCR5	hsa-miR-200b-3p	0.685357	0.194033	0.491323	9.55305e-89
AUTS2	DGCR5	hsa-miR-200c-3p	0.685357	0.223138	0.462219	4.5866e-81
AUTS2	EGOT	hsa-miR-200b-3p	0.846342	0.525399	0.320943	9.55305e-89
AUTS2	EGOT	hsa-miR-200c-3p	0.846342	0.552208	0.294133	4.5866e-81
AUTS2	FAM66C	hsa-miR-200b-3p	0.724143	0.305513	0.418629	9.55305e-89
AUTS2	FAM66C	hsa-miR-200c-3p	0.724143	0.327979	0.396164	4.5866e-81
AUTS2	HCG18	hsa-miR-200b-3p	0.716058	0.402299	0.31376	9.55305e-89
AUTS2	HCG18	hsa-miR-200c-3p	0.716058	0.429396	0.286662	4.5866e-81
AUTS2	PART1	hsa-miR-200b-3p	0.761647	0.132893	0.628754	9.55305e-89
AUTS2	PART1	hsa-miR-200c-3p	0.761647	0.220653	0.540993	4.5866e-81
AUTS2	PART1	hsa-miR-429	0.761647	0.368449	0.393198	4.58741e-17
AUTS2	PVT1	hsa-miR-200b-3p	0.755231	0.109042	0.646188	9.55305e-89
AUTS2	PVT1	hsa-miR-200c-3p	0.755231	0.165624	0.589607	4.5866e-81
B3GNT2	FAM66C	hsa-miR-200a-3p	0.694826	0.431205	0.263621	2.27304e-92
B3GNT2	FAM66C	hsa-miR-200b-3p	0.694826	0.403842	0.290984	9.55305e-89
B3GNT2	FAM66C	hsa-miR-200c-3p	0.694826	0.399399	0.295427	4.5866e-81
B3GNT2	PVT1	hsa-miR-200a-3p	0.734968	0.45248	0.282488	2.27304e-92
B3GNT2	PVT1	hsa-miR-200b-3p	0.734968	0.420859	0.314109	9.55305e-89
B3GNT2	PVT1	hsa-miR-200c-3p	0.734968	0.414658	0.32031	4.5866e-81
BAMBI	DGCR5	hsa-miR-205-5p	0.702947	0.420088	0.282859	4.24144e-50
BAMBI	EGOT	hsa-miR-205-5p	0.729482	0.360967	0.368515	4.24144e-50
BAMBI	PART1	hsa-miR-205-5p	0.738649	0.441904	0.296745	4.24144e-50
BAMBI	PVT1	hsa-miR-205-5p	0.747123	0.428687	0.318436	4.24144e-50
BCAP29	EMX2OS	hsa-miR-141-3p	0.796512	0.538274	0.258238	2.2947e-75
BCAP29	EMX2OS	hsa-miR-200a-3p	0.796512	0.509477	0.287035	2.27304e-92
BCL11B	EGOT	hsa-miR-200b-3p	0.688143	0.152437	0.535706	9.55305e-89
BCL11B	EGOT	hsa-miR-200c-3p	0.688143	0.179557	0.508586	4.5866e-81
BCL11B	FAM66C	hsa-miR-200b-3p	0.697346	0.300794	0.396552	9.55305e-89
BCL11B	FAM66C	hsa-miR-200c-3p	0.697346	0.315264	0.382082	4.5866e-81
BCL11B	GAS5	hsa-miR-200b-3p	0.711293	0.432765	0.278529	9.55305e-89
BCL11B	GAS5	hsa-miR-200c-3p	0.711293	0.44359	0.267704	4.5866e-81
BCL11B	PART1	hsa-miR-200b-3p	0.721724	0.141128	0.580596	9.55305e-89
BCL11B	PART1	hsa-miR-200c-3p	0.721724	0.199943	0.521782	4.5866e-81
BCL11B	PART1	hsa-miR-429	0.721724	0.387126	0.334599	4.58741e-17
BCL11B	PVT1	hsa-miR-200b-3p	0.771889	0.309759	0.46213	9.55305e-89
BCL11B	PVT1	hsa-miR-200c-3p	0.771889	0.340903	0.430986	4.5866e-81
BCL11B	SNHG1	hsa-miR-200b-3p	0.705097	0.43925	0.265847	9.55305e-89
BCL11B	SNHG1	hsa-miR-200c-3p	0.705097	0.451771	0.253326	4.5866e-81
BEND3	DGCR5	hsa-miR-141-3p	0.701581	0.336153	0.365428	2.2947e-75
BEND3	DGCR5	hsa-miR-200a-3p	0.701581	0.30322	0.398361	2.27304e-92
BEND3	PART1	hsa-miR-141-3p	0.723201	0.24214	0.48106	2.2947e-75
BEND3	PART1	hsa-miR-200a-3p	0.723201	0.22912	0.494081	2.27304e-92
BEND3	PVT1	hsa-miR-141-3p	0.772671	0.37585	0.396822	2.2947e-75
BEND3	PVT1	hsa-miR-200a-3p	0.772671	0.337419	0.435253	2.27304e-92
BIN1	H19	hsa-miR-22-3p	0.748432	0.410786	0.337646	9.02349e-28
C10orf95	DGCR5	hsa-miR-200b-3p	0.693585	0.253741	0.439844	9.55305e-89
C10orf95	DGCR5	hsa-miR-200c-3p	0.693585	0.289016	0.404569	4.5866e-81
C10orf95	PART1	hsa-miR-200b-3p	0.746479	0.15924	0.58724	9.55305e-89
C10orf95	PART1	hsa-miR-200c-3p	0.746479	0.256842	0.489638	4.5866e-81
C10orf95	PVT1	hsa-miR-200b-3p	0.738784	0.132358	0.606426	9.55305e-89
C10orf95	PVT1	hsa-miR-200c-3p	0.738784	0.206551	0.532233	4.5866e-81
C10orf95	SNHG10	hsa-miR-200b-3p	0.700651	0.367784	0.332867	9.55305e-89
C10orf95	SNHG10	hsa-miR-200c-3p	0.700651	0.372212	0.328439	4.5866e-81
C17orf100	DGCR5	hsa-miR-141-3p	0.720154	0.343085	0.377069	2.2947e-75
C17orf100	DGCR5	hsa-miR-200a-3p	0.720154	0.302858	0.417296	2.27304e-92
C17orf100	DGCR5	hsa-miR-200b-3p	0.720154	0.282046	0.438108	9.55305e-89
C17orf100	DGCR5	hsa-miR-200c-3p	0.720154	0.285653	0.434501	4.5866e-81
C17orf100	DGCR5	hsa-miR-205-5p	0.720154	0.434018	0.286136	4.24144e-50
C17orf100	EGOT	hsa-miR-141-3p	0.739828	0.333386	0.406442	2.2947e-75
C17orf100	EGOT	hsa-miR-200a-3p	0.739828	0.30826	0.431568	2.27304e-92
C17orf100	EGOT	hsa-miR-200b-3p	0.739828	0.19099	0.548839	9.55305e-89
C17orf100	EGOT	hsa-miR-200c-3p	0.739828	0.199733	0.540095	4.5866e-81
C17orf100	EGOT	hsa-miR-205-5p	0.739828	0.342441	0.397388	4.24144e-50
C17orf100	GAS5	hsa-miR-141-3p	0.712909	0.446065	0.266844	2.2947e-75
C17orf100	GAS5	hsa-miR-200a-3p	0.712909	0.394607	0.318302	2.27304e-92
C17orf100	GAS5	hsa-miR-200b-3p	0.712909	0.408024	0.304886	9.55305e-89
C17orf100	GAS5	hsa-miR-200c-3p	0.712909	0.414306	0.298603	4.5866e-81
C17orf100	PART1	hsa-miR-141-3p	0.794977	0.387572	0.407405	2.2947e-75
C17orf100	PART1	hsa-miR-200a-3p	0.794977	0.371967	0.42301	2.27304e-92
C17orf100	PART1	hsa-miR-200b-3p	0.794977	0.251316	0.543661	9.55305e-89
C17orf100	PART1	hsa-miR-200c-3p	0.794977	0.288163	0.506813	4.5866e-81
C17orf100	PART1	hsa-miR-205-5p	0.794977	0.540074	0.254903	4.24144e-50
C17orf100	PVT1	hsa-miR-141-3p	0.833074	0.497239	0.335835	2.2947e-75
C17orf100	PVT1	hsa-miR-200a-3p	0.833074	0.458957	0.374116	2.27304e-92
C17orf100	PVT1	hsa-miR-200b-3p	0.833074	0.39579	0.437284	9.55305e-89
C17orf100	PVT1	hsa-miR-200c-3p	0.833074	0.40306	0.430013	4.5866e-81
C17orf100	SNHG10	hsa-miR-141-3p	0.731702	0.461756	0.269946	2.2947e-75
C17orf100	SNHG10	hsa-miR-200a-3p	0.731702	0.433237	0.298465	2.27304e-92
C17orf100	SNHG10	hsa-miR-200b-3p	0.731702	0.419485	0.312217	9.55305e-89
C17orf100	SNHG10	hsa-miR-200c-3p	0.731702	0.400553	0.331149	4.5866e-81
C17orf100	SNHG8	hsa-miR-141-3p	0.763947	0.513207	0.250741	2.2947e-75
C17orf100	SNHG8	hsa-miR-200a-3p	0.763947	0.494537	0.26941	2.27304e-92
C17orf100	TMEM191A	hsa-miR-200b-3p	0.708618	0.408281	0.300338	9.55305e-89
C17orf100	TMEM191A	hsa-miR-200c-3p	0.708618	0.425444	0.283174	4.5866e-81
C20orf203	HCG18	hsa-miR-22-3p	0.697331	0.43283	0.2645	9.02349e-28
C3orf14	DGCR5	hsa-miR-141-3p	0.709558	0.325935	0.383623	2.2947e-75
C3orf14	DGCR5	hsa-miR-200a-3p	0.709558	0.287508	0.42205	2.27304e-92
C3orf14	EGOT	hsa-miR-141-3p	0.806911	0.512646	0.294266	2.2947e-75
C3orf14	EGOT	hsa-miR-200a-3p	0.806911	0.495882	0.311029	2.27304e-92
C3orf14	PART1	hsa-miR-141-3p	0.841833	0.541405	0.300428	2.2947e-75
C3orf14	PART1	hsa-miR-200a-3p	0.841833	0.531097	0.310737	2.27304e-92
C3orf14	PVT1	hsa-miR-141-3p	0.805492	0.425025	0.380467	2.2947e-75
C3orf14	PVT1	hsa-miR-200a-3p	0.805492	0.383425	0.422067	2.27304e-92
C4orf36	EGOT	hsa-miR-205-5p	0.715028	0.307771	0.407257	4.24144e-50
C4orf36	FAM66C	hsa-miR-205-5p	0.75003	0.474922	0.275109	4.24144e-50
C4orf36	PVT1	hsa-miR-205-5p	0.689972	0.281689	0.408283	4.24144e-50
CACNA1C	DGCR5	hsa-miR-200b-3p	0.720218	0.337003	0.383215	9.55305e-89
CACNA1C	DGCR5	hsa-miR-200c-3p	0.720218	0.327105	0.393114	4.5866e-81
CACNA1C	EGOT	hsa-miR-200b-3p	0.715603	0.211904	0.503699	9.55305e-89
CACNA1C	EGOT	hsa-miR-200c-3p	0.715603	0.197205	0.518398	4.5866e-81
CACNA1C	FAM66C	hsa-miR-200b-3p	0.705287	0.309411	0.395876	9.55305e-89
CACNA1C	FAM66C	hsa-miR-200c-3p	0.705287	0.298942	0.406344	4.5866e-81
CACNA1C	HCG18	hsa-miR-200b-3p	0.715836	0.426346	0.28949	9.55305e-89
CACNA1C	HCG18	hsa-miR-200c-3p	0.715836	0.436143	0.279693	4.5866e-81
CACNA1C	PART1	hsa-miR-200b-3p	0.696689	0.0317532	0.664936	9.55305e-89
CACNA1C	PART1	hsa-miR-200c-3p	0.696689	0.0409804	0.655709	4.5866e-81
CACNA1C	PART1	hsa-miR-429	0.696689	0.29505	0.401639	4.58741e-17
CACNA1C	PVT1	hsa-miR-200b-3p	0.795289	0.368576	0.426713	9.55305e-89
CACNA1C	PVT1	hsa-miR-200c-3p	0.795289	0.348395	0.446894	4.5866e-81
CADM1	HCG18	hsa-miR-200a-3p	0.748005	0.497793	0.250212	2.27304e-92
CADM1	HCG18	hsa-miR-22-3p	0.748005	0.473714	0.274291	9.02349e-28
CADM1	PART1	hsa-miR-141-3p	0.745666	0.36794	0.377726	2.2947e-75
CADM1	PART1	hsa-miR-200a-3p	0.745666	0.367408	0.378259	2.27304e-92
CADM1	PART1	hsa-miR-200b-3p	0.745666	0.262599	0.483067	9.55305e-89
CADM1	PART1	hsa-miR-200c-3p	0.745666	0.376885	0.368781	4.5866e-81
CADM1	PART1	hsa-miR-22-3p	0.745666	0.495387	0.250279	9.02349e-28
CADM1	PART1	hsa-miR-429	0.745666	0.43808	0.307587	4.58741e-17
CASK	FAM66C	hsa-miR-200b-3p	0.718901	0.368899	0.350002	9.55305e-89
CASK	FAM66C	hsa-miR-200c-3p	0.718901	0.384207	0.334694	4.5866e-81
CASK	PART1	hsa-miR-200b-3p	0.750024	0.279128	0.470896	9.55305e-89
CASK	PART1	hsa-miR-200c-3p	0.750024	0.331318	0.418706	4.5866e-81
CASK	PART1	hsa-miR-429	0.750024	0.477117	0.272908	4.58741e-17
CASK	PVT1	hsa-miR-200b-3p	0.725511	0.199502	0.526009	9.55305e-89
CASK	PVT1	hsa-miR-200c-3p	0.725511	0.236131	0.48938	4.5866e-81
CASKIN1	PVT1	hsa-miR-200b-3p	0.697604	0.262799	0.434806	9.55305e-89
CASKIN1	PVT1	hsa-miR-200c-3p	0.697604	0.335459	0.362145	4.5866e-81
CASZ1	DGCR5	hsa-miR-200b-3p	0.742771	0.305915	0.436856	9.55305e-89
CASZ1	DGCR5	hsa-miR-200c-3p	0.742771	0.315862	0.426909	4.5866e-81
CASZ1	EGOT	hsa-miR-200b-3p	0.797772	0.317558	0.480214	9.55305e-89
CASZ1	EGOT	hsa-miR-200c-3p	0.797772	0.335596	0.462176	4.5866e-81
CASZ1	PART1	hsa-miR-200b-3p	0.768825	0.0510065	0.717819	9.55305e-89
CASZ1	PART1	hsa-miR-200c-3p	0.768825	0.12346	0.645365	4.5866e-81
CASZ1	PART1	hsa-miR-429	0.768825	0.349794	0.419031	4.58741e-17
CASZ1	PVT1	hsa-miR-200b-3p	0.816173	0.247375	0.568799	9.55305e-89
CASZ1	PVT1	hsa-miR-200c-3p	0.816173	0.270201	0.545973	4.5866e-81
CASZ1	SNHG10	hsa-miR-200b-3p	0.718249	0.368024	0.350226	9.55305e-89
CASZ1	SNHG10	hsa-miR-200c-3p	0.718249	0.349087	0.369162	4.5866e-81
CBX4	DGCR5	hsa-miR-200b-3p	0.688272	0.331222	0.35705	9.55305e-89
CBX4	DGCR5	hsa-miR-200c-3p	0.688272	0.331075	0.357196	4.5866e-81
CBX4	PART1	hsa-miR-200b-3p	0.7009	0.204077	0.496822	9.55305e-89
CBX4	PART1	hsa-miR-200c-3p	0.7009	0.222949	0.477951	4.5866e-81
CBX4	PART1	hsa-miR-429	0.7009	0.405371	0.295529	4.58741e-17
CBX4	PVT1	hsa-miR-200b-3p	0.701547	0.206228	0.495319	9.55305e-89
CBX4	PVT1	hsa-miR-200c-3p	0.701547	0.203883	0.497664	4.5866e-81
CCDC6	EGOT	hsa-miR-141-3p	0.735164	0.422744	0.312421	2.2947e-75
CCDC6	EGOT	hsa-miR-200a-3p	0.735164	0.389794	0.345371	2.27304e-92
CCDC6	FAM66C	hsa-miR-141-3p	0.717536	0.449723	0.267812	2.2947e-75
CCDC6	FAM66C	hsa-miR-200a-3p	0.717536	0.408138	0.309398	2.27304e-92
CCDC6	HCG18	hsa-miR-200a-3p	0.724767	0.446964	0.277803	2.27304e-92
CCDC6	PART1	hsa-miR-141-3p	0.751237	0.40821	0.343027	2.2947e-75
CCDC6	PART1	hsa-miR-200a-3p	0.751237	0.371837	0.3794	2.27304e-92
CCDC6	PVT1	hsa-miR-141-3p	0.712806	0.300548	0.412258	2.2947e-75
CCDC6	PVT1	hsa-miR-200a-3p	0.712806	0.22837	0.484436	2.27304e-92
CCDC85C	DGCR5	hsa-miR-141-3p	0.798621	0.514975	0.283646	2.2947e-75
CCDC85C	DGCR5	hsa-miR-200a-3p	0.798621	0.475937	0.322684	2.27304e-92
CCDC85C	EGOT	hsa-miR-141-3p	0.703173	0.199079	0.504094	2.2947e-75
CCDC85C	EGOT	hsa-miR-200a-3p	0.703173	0.156638	0.546535	2.27304e-92
CCDC85C	EGOT	hsa-miR-205-5p	0.703173	0.345761	0.357412	4.24144e-50
CCDC85C	PART1	hsa-miR-141-3p	0.798832	0.352621	0.446211	2.2947e-75
CCDC85C	PART1	hsa-miR-200a-3p	0.798832	0.324976	0.473856	2.27304e-92
CCDC85C	PVT1	hsa-miR-141-3p	0.820297	0.412359	0.407938	2.2947e-75
CCDC85C	PVT1	hsa-miR-200a-3p	0.820297	0.345127	0.47517	2.27304e-92
CCDC85C	SNHG8	hsa-miR-141-3p	0.69645	0.34533	0.35112	2.2947e-75
CCDC85C	SNHG8	hsa-miR-200a-3p	0.69645	0.314375	0.382075	2.27304e-92
CCNJL	DGCR5	hsa-miR-200b-3p	0.78989	0.474241	0.315649	9.55305e-89
CCNJL	DGCR5	hsa-miR-200c-3p	0.78989	0.468976	0.320914	4.5866e-81
CCNJL	EGOT	hsa-miR-200b-3p	0.74067	0.21471	0.52596	9.55305e-89
CCNJL	EGOT	hsa-miR-200c-3p	0.74067	0.205904	0.534766	4.5866e-81
CCNJL	PART1	hsa-miR-200b-3p	0.743401	0.0885618	0.654839	9.55305e-89
CCNJL	PART1	hsa-miR-200c-3p	0.743401	0.108538	0.634863	4.5866e-81
CCNJL	PART1	hsa-miR-429	0.743401	0.338058	0.405343	4.58741e-17
CCNJL	PVT1	hsa-miR-200b-3p	0.834247	0.424098	0.410149	9.55305e-89
CCNJL	PVT1	hsa-miR-200c-3p	0.834247	0.411741	0.422506	4.5866e-81
CCNJL	TMEM191A	hsa-miR-200b-3p	0.706607	0.408518	0.298089	9.55305e-89
CCNJL	TMEM191A	hsa-miR-200c-3p	0.706607	0.421631	0.284976	4.5866e-81
CDC14A	EGOT	hsa-miR-141-3p	0.716301	0.467374	0.248927	2.2947e-75
CDC14A	EGOT	hsa-miR-200a-3p	0.716301	0.459011	0.25729	2.27304e-92
CDC14A	PVT1	hsa-miR-141-3p	0.690575	0.380465	0.31011	2.2947e-75
CDC14A	PVT1	hsa-miR-200a-3p	0.690575	0.364409	0.326165	2.27304e-92
CDC14A	PVT1	hsa-miR-22-3p	0.690575	0.436127	0.254448	9.02349e-28
CDH20	EMX2OS	hsa-miR-200b-3p	0.700991	0.431769	0.269223	9.55305e-89
CDH5	H19	hsa-miR-22-3p	0.780669	0.402799	0.37787	9.02349e-28
CDK2	DGCR5	hsa-miR-200b-3p	0.718554	0.259217	0.459337	9.55305e-89
CDK2	DGCR5	hsa-miR-200c-3p	0.718554	0.266558	0.451996	4.5866e-81
CDK2	EGOT	hsa-miR-200b-3p	0.770705	0.259803	0.510902	9.55305e-89
CDK2	EGOT	hsa-miR-200c-3p	0.770705	0.273151	0.497554	4.5866e-81
CDK2	FAM66C	hsa-miR-200b-3p	0.703668	0.229785	0.473883	9.55305e-89
CDK2	FAM66C	hsa-miR-200c-3p	0.703668	0.237004	0.466665	4.5866e-81
CDK2	PART1	hsa-miR-200b-3p	0.809284	0.267176	0.542108	9.55305e-89
CDK2	PART1	hsa-miR-200c-3p	0.809284	0.312062	0.497222	4.5866e-81
CDK2	PART1	hsa-miR-429	0.809284	0.498333	0.310952	4.58741e-17
CDK2	PVT1	hsa-miR-200b-3p	0.837133	0.377004	0.460129	9.55305e-89
CDK2	PVT1	hsa-miR-200c-3p	0.837133	0.390387	0.446746	4.5866e-81
CELF2	AGAP11	hsa-miR-452-5p	0.724493	0.450259	0.274235	0.000628283
CELF2	MESTIT1	hsa-miR-452-5p	0.774955	0.524012	0.250943	0.000628283
CFL2	EMX2OS	hsa-miR-141-3p	0.74206	0.435123	0.306937	2.2947e-75
CFL2	EMX2OS	hsa-miR-200a-3p	0.74206	0.420377	0.321682	2.27304e-92
CFL2	EMX2OS	hsa-miR-200b-3p	0.74206	0.472079	0.269981	9.55305e-89
CGNL1	DNM1P35	hsa-miR-22-3p	0.685767	0.39474	0.291027	9.02349e-28
CGNL1	HCG18	hsa-miR-22-3p	0.712008	0.412012	0.299996	9.02349e-28
CHKA	HCG18	hsa-miR-200a-3p	0.750067	0.452213	0.297854	2.27304e-92
CHKA	PART1	hsa-miR-141-3p	0.772683	0.396368	0.376316	2.2947e-75
CHKA	PART1	hsa-miR-200a-3p	0.772683	0.295949	0.476734	2.27304e-92
CHKA	PVT1	hsa-miR-141-3p	0.784455	0.423648	0.360808	2.2947e-75
CHKA	PVT1	hsa-miR-200a-3p	0.784455	0.283287	0.501168	2.27304e-92
CHST9	DGCR5	hsa-miR-200b-3p	0.715375	0.15892	0.556455	9.55305e-89
CHST9	DGCR5	hsa-miR-200c-3p	0.715375	0.17751	0.537865	4.5866e-81
CHST9	EGOT	hsa-miR-200b-3p	0.80801	0.273752	0.534258	9.55305e-89
CHST9	EGOT	hsa-miR-200c-3p	0.80801	0.29686	0.511149	4.5866e-81
CHST9	FAM66C	hsa-miR-200b-3p	0.700948	0.12685	0.574098	9.55305e-89
CHST9	FAM66C	hsa-miR-200c-3p	0.700948	0.146096	0.554853	4.5866e-81
CHST9	PART1	hsa-miR-200b-3p	0.827595	0.162338	0.665257	9.55305e-89
CHST9	PART1	hsa-miR-200c-3p	0.827595	0.243663	0.583932	4.5866e-81
CHST9	PART1	hsa-miR-429	0.827595	0.52372	0.303875	4.58741e-17
CHST9	PVT1	hsa-miR-200b-3p	0.841816	0.231936	0.60988	9.55305e-89
CHST9	PVT1	hsa-miR-200c-3p	0.841816	0.260621	0.581195	4.5866e-81
CHSY1	PART1	hsa-miR-200b-3p	0.689306	0.232283	0.457023	9.55305e-89
CHSY1	PART1	hsa-miR-200c-3p	0.689306	0.258005	0.431301	4.5866e-81
CHSY1	PART1	hsa-miR-429	0.689306	0.413749	0.275558	4.58741e-17
CHSY1	PVT1	hsa-miR-200b-3p	0.786749	0.522197	0.264553	9.55305e-89
CHSY1	PVT1	hsa-miR-200c-3p	0.786749	0.5366	0.250149	4.5866e-81
CNKSR3	PVT1	hsa-miR-200b-3p	0.70205	0.450663	0.251386	9.55305e-89
CNNM1	EGOT	hsa-miR-205-5p	0.707981	0.194178	0.513803	4.24144e-50
CNNM1	FAM66C	hsa-miR-205-5p	0.733409	0.39258	0.340829	4.24144e-50
CNNM1	GAS5	hsa-miR-205-5p	0.700226	0.426991	0.273235	4.24144e-50
CNNM1	PART1	hsa-miR-205-5p	0.742299	0.38485	0.357449	4.24144e-50
CNNM1	PVT1	hsa-miR-205-5p	0.768769	0.401311	0.367458	4.24144e-50
CNTFR	EMX2OS	hsa-miR-200b-3p	0.760733	0.51182	0.248913	9.55305e-89
CNTN1	FAM66C	hsa-miR-200a-3p	0.699751	0.433272	0.266478	2.27304e-92
CTBP2	DGCR5	hsa-miR-141-3p	0.754411	0.398482	0.355929	2.2947e-75
CTBP2	DGCR5	hsa-miR-200a-3p	0.754411	0.36219	0.392221	2.27304e-92
CTBP2	DGCR5	hsa-miR-200b-3p	0.754411	0.377436	0.376975	9.55305e-89
CTBP2	DGCR5	hsa-miR-200c-3p	0.754411	0.395977	0.358434	4.5866e-81
CTBP2	EGOT	hsa-miR-141-3p	0.746638	0.310802	0.435836	2.2947e-75
CTBP2	EGOT	hsa-miR-200a-3p	0.746638	0.29037	0.456268	2.27304e-92
CTBP2	EGOT	hsa-miR-200b-3p	0.746638	0.221994	0.524644	9.55305e-89
CTBP2	EGOT	hsa-miR-200c-3p	0.746638	0.26046	0.486178	4.5866e-81
CTBP2	FAM66C	hsa-miR-141-3p	0.697605	0.317091	0.380515	2.2947e-75
CTBP2	FAM66C	hsa-miR-200a-3p	0.697605	0.266758	0.430847	2.27304e-92
CTBP2	FAM66C	hsa-miR-200b-3p	0.697605	0.239669	0.457937	9.55305e-89
CTBP2	FAM66C	hsa-miR-200c-3p	0.697605	0.263439	0.434166	4.5866e-81
CTBP2	GAS5	hsa-miR-200a-3p	0.775676	0.528263	0.247413	2.27304e-92
CTBP2	HCG18	hsa-miR-200a-3p	0.759174	0.461713	0.297461	2.27304e-92
CTBP2	HCG18	hsa-miR-200b-3p	0.759174	0.503636	0.255539	9.55305e-89
CTBP2	PART1	hsa-miR-141-3p	0.828944	0.441692	0.387252	2.2947e-75
CTBP2	PART1	hsa-miR-200a-3p	0.828944	0.436212	0.392733	2.27304e-92
CTBP2	PART1	hsa-miR-200b-3p	0.828944	0.391589	0.437355	9.55305e-89
CTBP2	PART1	hsa-miR-200c-3p	0.828944	0.45235	0.376594	4.5866e-81
CTBP2	PART1	hsa-miR-429	0.828944	0.546017	0.282928	4.58741e-17
CTBP2	PVT1	hsa-miR-141-3p	0.831729	0.441358	0.390371	2.2947e-75
CTBP2	PVT1	hsa-miR-200a-3p	0.831729	0.400746	0.430983	2.27304e-92
CTBP2	PVT1	hsa-miR-200b-3p	0.831729	0.402163	0.429565	9.55305e-89
CTBP2	PVT1	hsa-miR-200c-3p	0.831729	0.446319	0.385409	4.5866e-81
CTBP2	SNHG1	hsa-miR-200a-3p	0.773349	0.517883	0.255467	2.27304e-92
CTBP2	SNHG8	hsa-miR-141-3p	0.751428	0.472284	0.279144	2.2947e-75
CTBP2	SNHG8	hsa-miR-200a-3p	0.751428	0.452765	0.298663	2.27304e-92
CTNND2	DGCR5	hsa-miR-141-3p	0.747245	0.415329	0.331916	2.2947e-75
CTNND2	DGCR5	hsa-miR-200a-3p	0.747245	0.376819	0.370426	2.27304e-92
CTNND2	DGCR5	hsa-miR-200b-3p	0.747245	0.360072	0.387172	9.55305e-89
CTNND2	DGCR5	hsa-miR-200c-3p	0.747245	0.348104	0.399141	4.5866e-81
CTNND2	EGOT	hsa-miR-141-3p	0.763204	0.403239	0.359965	2.2947e-75
CTNND2	EGOT	hsa-miR-200a-3p	0.763204	0.377297	0.385907	2.27304e-92
CTNND2	EGOT	hsa-miR-200b-3p	0.763204	0.275193	0.488011	9.55305e-89
CTNND2	EGOT	hsa-miR-200c-3p	0.763204	0.257286	0.505918	4.5866e-81
CTNND2	PART1	hsa-miR-141-3p	0.746718	0.258117	0.488601	2.2947e-75
CTNND2	PART1	hsa-miR-200a-3p	0.746718	0.233177	0.513541	2.27304e-92
CTNND2	PART1	hsa-miR-200b-3p	0.746718	0.0877985	0.658919	9.55305e-89
CTNND2	PART1	hsa-miR-200c-3p	0.746718	0.093478	0.65324	4.5866e-81
CTNND2	PART1	hsa-miR-429	0.746718	0.360302	0.386416	4.58741e-17
CTNND2	PVT1	hsa-miR-141-3p	0.797976	0.403684	0.394291	2.2947e-75
CTNND2	PVT1	hsa-miR-200a-3p	0.797976	0.350107	0.447869	2.27304e-92
CTNND2	PVT1	hsa-miR-200b-3p	0.797976	0.279207	0.518768	9.55305e-89
CTNND2	PVT1	hsa-miR-200c-3p	0.797976	0.248038	0.549937	4.5866e-81
CXADR	DGCR5	hsa-miR-141-3p	0.699526	0.205415	0.494111	2.2947e-75
CXADR	DGCR5	hsa-miR-200a-3p	0.699526	0.144633	0.554893	2.27304e-92
CXADR	EGOT	hsa-miR-141-3p	0.856553	0.595196	0.261357	2.2947e-75
CXADR	EGOT	hsa-miR-200a-3p	0.856553	0.575612	0.280941	2.27304e-92
CXADR	FAM66C	hsa-miR-141-3p	0.788367	0.529278	0.259089	2.2947e-75
CXADR	FAM66C	hsa-miR-200a-3p	0.788367	0.476164	0.312203	2.27304e-92
CXADR	HCG18	hsa-miR-141-3p	0.710304	0.400112	0.310192	2.2947e-75
CXADR	HCG18	hsa-miR-200a-3p	0.710304	0.305254	0.405051	2.27304e-92
CXADR	PART1	hsa-miR-141-3p	0.830207	0.377075	0.453132	2.2947e-75
CXADR	PART1	hsa-miR-200a-3p	0.830207	0.36193	0.468277	2.27304e-92
CXADR	PVT1	hsa-miR-141-3p	0.847187	0.426599	0.420588	2.2947e-75
CXADR	PVT1	hsa-miR-200a-3p	0.847187	0.360524	0.486663	2.27304e-92
DCAF7	PVT1	hsa-miR-200b-3p	0.686987	0.22949	0.457497	9.55305e-89
DCAF7	PVT1	hsa-miR-200c-3p	0.686987	0.285249	0.401738	4.5866e-81
DCDC2	EGOT	hsa-miR-200c-3p	0.894115	0.647334	0.246781	4.5866e-81
DCDC2	PART1	hsa-miR-200b-3p	0.708747	-0.162886	0.871633	9.55305e-89
DCDC2	PART1	hsa-miR-200c-3p	0.708747	-0.130464	0.839211	4.5866e-81
DCDC2	PART1	hsa-miR-205-5p	0.708747	0.291725	0.417023	4.24144e-50
DCDC2	PART1	hsa-miR-429	0.708747	0.301912	0.406835	4.58741e-17
DCDC2	PVT1	hsa-miR-200b-3p	0.725099	-0.0964565	0.821556	9.55305e-89
DCDC2	PVT1	hsa-miR-200c-3p	0.725099	-0.127249	0.852348	4.5866e-81
DCDC2	PVT1	hsa-miR-205-5p	0.725099	0.273422	0.451678	4.24144e-50
DGKA	PVT1	hsa-miR-200b-3p	0.738971	0.399933	0.339038	9.55305e-89
DGKA	PVT1	hsa-miR-200c-3p	0.738971	0.343176	0.395796	4.5866e-81
DIRAS2	PART1	hsa-miR-200b-3p	0.704456	0.15996	0.544495	9.55305e-89
DIRAS2	PART1	hsa-miR-200c-3p	0.704456	0.248262	0.456194	4.5866e-81
DIRAS2	PART1	hsa-miR-429	0.704456	0.378012	0.326444	4.58741e-17
DIRAS2	PVT1	hsa-miR-200b-3p	0.720144	0.210257	0.509887	9.55305e-89
DIRAS2	PVT1	hsa-miR-200c-3p	0.720144	0.27849	0.441654	4.5866e-81
DLG3	DGCR5	hsa-miR-141-3p	0.816483	0.539209	0.277274	2.2947e-75
DLG3	DGCR5	hsa-miR-200a-3p	0.816483	0.488637	0.327846	2.27304e-92
DLG3	EGOT	hsa-miR-141-3p	0.845547	0.548716	0.296831	2.2947e-75
DLG3	EGOT	hsa-miR-200a-3p	0.845547	0.523308	0.322239	2.27304e-92
DLG3	FAM66C	hsa-miR-141-3p	0.706811	0.278677	0.428134	2.2947e-75
DLG3	FAM66C	hsa-miR-200a-3p	0.706811	0.195455	0.511356	2.27304e-92
DLG3	PART1	hsa-miR-141-3p	0.903445	0.620016	0.283429	2.2947e-75
DLG3	PART1	hsa-miR-200a-3p	0.903445	0.611219	0.292226	2.27304e-92
DLG3	PVT1	hsa-miR-141-3p	0.908163	0.626908	0.281255	2.2947e-75
DLG3	PVT1	hsa-miR-200a-3p	0.908163	0.567171	0.340992	2.27304e-92
DLG3	SNHG10	hsa-miR-141-3p	0.688713	0.304061	0.384652	2.2947e-75
DLG3	SNHG10	hsa-miR-200a-3p	0.688713	0.25037	0.438343	2.27304e-92
DLG3	SNHG8	hsa-miR-141-3p	0.696167	0.287796	0.408372	2.2947e-75
DLG3	SNHG8	hsa-miR-200a-3p	0.696167	0.249436	0.446732	2.27304e-92
DNMT3B	DGCR5	hsa-miR-200b-3p	0.707711	0.387973	0.319738	9.55305e-89
DNMT3B	DGCR5	hsa-miR-200c-3p	0.707711	0.40111	0.306601	4.5866e-81
DNMT3B	PART1	hsa-miR-200b-3p	0.687742	0.198481	0.489261	9.55305e-89
DNMT3B	PART1	hsa-miR-200c-3p	0.687742	0.24437	0.443372	4.5866e-81
DNMT3B	PART1	hsa-miR-429	0.687742	0.320923	0.366819	4.58741e-17
DNMT3B	PVT1	hsa-miR-200b-3p	0.690915	0.208221	0.482693	9.55305e-89
DNMT3B	PVT1	hsa-miR-200c-3p	0.690915	0.236927	0.453988	4.5866e-81
DRD2	DGCR5	hsa-miR-141-3p	0.782777	0.440584	0.342193	2.2947e-75
DRD2	DGCR5	hsa-miR-200a-3p	0.782777	0.403296	0.37948	2.27304e-92
DRD2	EGOT	hsa-miR-141-3p	0.805135	0.427058	0.378077	2.2947e-75
DRD2	EGOT	hsa-miR-200a-3p	0.805135	0.414422	0.390713	2.27304e-92
DRD2	PART1	hsa-miR-141-3p	0.829765	0.358232	0.471533	2.2947e-75
DRD2	PART1	hsa-miR-200a-3p	0.829765	0.369271	0.460495	2.27304e-92
DRD2	PVT1	hsa-miR-141-3p	0.840316	0.383531	0.456786	2.2947e-75
DRD2	PVT1	hsa-miR-200a-3p	0.840316	0.343429	0.496888	2.27304e-92
DRD2	SNHG8	hsa-miR-141-3p	0.730514	0.399634	0.33088	2.2947e-75
DRD2	SNHG8	hsa-miR-200a-3p	0.730514	0.378132	0.352382	2.27304e-92
DSC1	EGOT	hsa-miR-205-5p	0.823269	0.506684	0.316585	4.24144e-50
DSC1	FAM66C	hsa-miR-205-5p	0.728955	0.377673	0.351282	4.24144e-50
DSC1	PART1	hsa-miR-205-5p	0.715791	0.314915	0.400877	4.24144e-50
DSC1	PVT1	hsa-miR-205-5p	0.755803	0.36125	0.394553	4.24144e-50
DSC2	DGCR5	hsa-miR-205-5p	0.684744	0.324361	0.360382	4.24144e-50
DSC2	EGOT	hsa-miR-205-5p	0.742365	0.277709	0.464657	4.24144e-50
DSC2	FAM66C	hsa-miR-205-5p	0.784213	0.50728	0.276933	4.24144e-50
DSC2	PART1	hsa-miR-205-5p	0.804853	0.531734	0.27312	4.24144e-50
DSC2	PVT1	hsa-miR-205-5p	0.789747	0.448322	0.341424	4.24144e-50
EFNA1	DGCR5	hsa-miR-200b-3p	0.691947	0.320597	0.37135	9.55305e-89
EFNA1	DGCR5	hsa-miR-200c-3p	0.691947	0.329465	0.362482	4.5866e-81
EFNA1	EGOT	hsa-miR-200b-3p	0.69596	0.237253	0.458706	9.55305e-89
EFNA1	EGOT	hsa-miR-200c-3p	0.69596	0.252488	0.443471	4.5866e-81
EFNA1	PVT1	hsa-miR-200b-3p	0.703272	0.170578	0.532694	9.55305e-89
EFNA1	PVT1	hsa-miR-200c-3p	0.703272	0.187872	0.5154	4.5866e-81
EFNA1	TMEM191A	hsa-miR-200b-3p	0.68985	0.416452	0.273399	9.55305e-89
EFNA1	TMEM191A	hsa-miR-200c-3p	0.68985	0.43171	0.258141	4.5866e-81
EIF4E3	EMX2OS	hsa-miR-200b-3p	0.74634	0.481654	0.264687	9.55305e-89
EIF4EBP2	EMX2OS	hsa-miR-141-3p	0.750405	0.490801	0.259604	2.2947e-75
EIF4EBP2	EMX2OS	hsa-miR-200a-3p	0.750405	0.450398	0.300008	2.27304e-92
EMILIN3	DGCR5	hsa-miR-22-3p	0.687161	0.425668	0.261493	9.02349e-28
EMILIN3	PART1	hsa-miR-22-3p	0.708921	0.462312	0.246608	9.02349e-28
EMX2	H19	hsa-miR-22-3p	0.753125	0.395303	0.357822	9.02349e-28
ENPP5	EGOT	hsa-miR-141-3p	0.830084	0.545196	0.284888	2.2947e-75
ENPP5	EGOT	hsa-miR-200a-3p	0.830084	0.526917	0.303166	2.27304e-92
ENPP5	PART1	hsa-miR-141-3p	0.770109	0.259922	0.510188	2.2947e-75
ENPP5	PART1	hsa-miR-200a-3p	0.770109	0.24232	0.527789	2.27304e-92
ENPP5	PVT1	hsa-miR-141-3p	0.796331	0.333441	0.462889	2.2947e-75
ENPP5	PVT1	hsa-miR-200a-3p	0.796331	0.271948	0.524382	2.27304e-92
ENPP5	SNHG10	hsa-miR-141-3p	0.70763	0.395526	0.312104	2.2947e-75
ENPP5	SNHG10	hsa-miR-200a-3p	0.70763	0.361663	0.345967	2.27304e-92
EPS8	EMX2OS	hsa-miR-452-5p	0.747371	0.403403	0.343969	0.000628283
EPS8	MESTIT1	hsa-miR-452-5p	0.759336	0.489507	0.269828	0.000628283
ERBB3	DGCR5	hsa-miR-205-5p	0.755391	0.462354	0.293037	4.24144e-50
ERBB3	EGOT	hsa-miR-205-5p	0.870257	0.59296	0.277297	4.24144e-50
ERBB3	FAM66C	hsa-miR-205-5p	0.719917	0.303795	0.416122	4.24144e-50
ERBB4	EGOT	hsa-miR-200b-3p	0.7761	0.413778	0.362322	9.55305e-89
ERBB4	EGOT	hsa-miR-200c-3p	0.7761	0.447546	0.328555	4.5866e-81
ESRP1	EGOT	hsa-miR-200b-3p	0.765987	0.0261086	0.739878	9.55305e-89
ESRP1	EGOT	hsa-miR-200c-3p	0.765987	0.00740714	0.75858	4.5866e-81
ESRP1	PART1	hsa-miR-200b-3p	0.8654	0.271703	0.593697	9.55305e-89
ESRP1	PART1	hsa-miR-200c-3p	0.8654	0.30481	0.56059	4.5866e-81
ESRP1	PART1	hsa-miR-429	0.8654	0.617036	0.248364	4.58741e-17
ESRP1	PVT1	hsa-miR-200b-3p	0.83946	0.127936	0.711524	9.55305e-89
ESRP1	PVT1	hsa-miR-200c-3p	0.83946	0.0898968	0.749563	4.5866e-81
ESRRG	HCG18	hsa-miR-200a-3p	0.698947	0.427001	0.271946	2.27304e-92
ESRRG	HCG18	hsa-miR-200b-3p	0.698947	0.425549	0.273398	9.55305e-89
ESRRG	PART1	hsa-miR-141-3p	0.708463	0.330622	0.377841	2.2947e-75
ESRRG	PART1	hsa-miR-200a-3p	0.708463	0.330858	0.377605	2.27304e-92
ESRRG	PART1	hsa-miR-200b-3p	0.708463	0.215982	0.492481	9.55305e-89
ESRRG	PART1	hsa-miR-200c-3p	0.708463	0.315556	0.392906	4.5866e-81
ESRRG	PART1	hsa-miR-429	0.708463	0.350058	0.358405	4.58741e-17
ESRRG	PVT1	hsa-miR-141-3p	0.690137	0.277323	0.412814	2.2947e-75
ESRRG	PVT1	hsa-miR-200a-3p	0.690137	0.254357	0.43578	2.27304e-92
ESRRG	PVT1	hsa-miR-200b-3p	0.690137	0.159171	0.530966	9.55305e-89
ESRRG	PVT1	hsa-miR-200c-3p	0.690137	0.248465	0.441672	4.5866e-81
ETV1	HCG18	hsa-miR-22-3p	0.760527	0.507478	0.253049	9.02349e-28
ETV1	PART1	hsa-miR-22-3p	0.740896	0.491901	0.248995	9.02349e-28
ETV5	HCG18	hsa-miR-200b-3p	0.689237	0.412225	0.277013	9.55305e-89
ETV5	HCG18	hsa-miR-200c-3p	0.689237	0.433082	0.256156	4.5866e-81
ETV5	PART1	hsa-miR-200b-3p	0.689373	0.176852	0.51252	9.55305e-89
ETV5	PART1	hsa-miR-200c-3p	0.689373	0.232582	0.456791	4.5866e-81
ETV5	PART1	hsa-miR-429	0.689373	0.280871	0.408502	4.58741e-17
ETV5	PVT1	hsa-miR-200b-3p	0.785616	0.472592	0.313024	9.55305e-89
ETV5	PVT1	hsa-miR-200c-3p	0.785616	0.509308	0.276308	4.5866e-81
EZR	EGOT	hsa-miR-205-5p	0.743602	0.460285	0.283317	4.24144e-50
FAM81A	PART1	hsa-miR-200b-3p	0.693766	0.228904	0.464863	9.55305e-89
FAM81A	PART1	hsa-miR-200c-3p	0.693766	0.308761	0.385005	4.5866e-81
FAM81A	PART1	hsa-miR-429	0.693766	0.32642	0.367346	4.58741e-17
FAM81A	PVT1	hsa-miR-200b-3p	0.753583	0.408634	0.34495	9.55305e-89
FAM81A	PVT1	hsa-miR-200c-3p	0.753583	0.474609	0.278974	4.5866e-81
FARP1	DGCR5	hsa-miR-200b-3p	0.697175	0.302177	0.394998	9.55305e-89
FARP1	DGCR5	hsa-miR-200c-3p	0.697175	0.317764	0.37941	4.5866e-81
FARP1	PART1	hsa-miR-200b-3p	0.751546	0.26124	0.490306	9.55305e-89
FARP1	PART1	hsa-miR-200c-3p	0.751546	0.311813	0.439733	4.5866e-81
FARP1	PART1	hsa-miR-429	0.751546	0.371118	0.380428	4.58741e-17
FARP1	PVT1	hsa-miR-200b-3p	0.799164	0.418932	0.380231	9.55305e-89
FARP1	PVT1	hsa-miR-200c-3p	0.799164	0.450438	0.348726	4.5866e-81
FBXL16	DGCR5	hsa-miR-200b-3p	0.741112	0.214206	0.526906	9.55305e-89
FBXL16	DGCR5	hsa-miR-200c-3p	0.741112	0.192304	0.548809	4.5866e-81
FBXL16	EGOT	hsa-miR-200b-3p	0.791119	0.150961	0.640158	9.55305e-89
FBXL16	EGOT	hsa-miR-200c-3p	0.791119	0.118507	0.672612	4.5866e-81
FBXL16	PART1	hsa-miR-200b-3p	0.87096	0.313345	0.557614	9.55305e-89
FBXL16	PART1	hsa-miR-200c-3p	0.87096	0.329794	0.541166	4.5866e-81
FBXL16	PART1	hsa-miR-429	0.87096	0.613306	0.257654	4.58741e-17
FBXL16	PVT1	hsa-miR-200b-3p	0.876145	0.341979	0.534166	9.55305e-89
FBXL16	PVT1	hsa-miR-200c-3p	0.876145	0.295622	0.580524	4.5866e-81
FBXL16	SNHG10	hsa-miR-200b-3p	0.684872	0.220408	0.464464	9.55305e-89
FBXL16	SNHG10	hsa-miR-200c-3p	0.684872	0.162169	0.522703	4.5866e-81
FBXL19	DGCR5	hsa-miR-141-3p	0.733641	0.450451	0.283189	2.2947e-75
FBXL19	DGCR5	hsa-miR-200a-3p	0.733641	0.442523	0.291118	2.27304e-92
FBXL19	PVT1	hsa-miR-141-3p	0.716868	0.308779	0.408089	2.2947e-75
FBXL19	PVT1	hsa-miR-200a-3p	0.716868	0.303838	0.41303	2.27304e-92
FEZ2	EMX2OS	hsa-miR-200b-3p	0.774512	0.52338	0.251132	9.55305e-89
FEZ2	H19	hsa-miR-200b-3p	0.727001	0.469963	0.257038	9.55305e-89
FNBP1L	EGOT	hsa-miR-141-3p	0.70874	0.337985	0.370755	2.2947e-75
FNBP1L	EGOT	hsa-miR-200a-3p	0.70874	0.321898	0.386843	2.27304e-92
FNBP1L	EGOT	hsa-miR-205-5p	0.70874	0.387112	0.321628	4.24144e-50
FNBP1L	FAM66C	hsa-miR-141-3p	0.691814	0.382625	0.309189	2.2947e-75
FNBP1L	FAM66C	hsa-miR-200a-3p	0.691814	0.349687	0.342127	2.27304e-92
FNBP1L	FAM66C	hsa-miR-205-5p	0.691814	0.412152	0.279662	4.24144e-50
FNBP1L	SNHG1	hsa-miR-141-3p	0.703704	0.445363	0.258341	2.2947e-75
FNBP1L	SNHG1	hsa-miR-200a-3p	0.703704	0.415914	0.28779	2.27304e-92
FOXA1	DGCR5	hsa-miR-141-3p	0.700999	0.24598	0.455019	2.2947e-75
FOXA1	DGCR5	hsa-miR-200a-3p	0.700999	0.204654	0.496345	2.27304e-92
FOXA1	FAM66C	hsa-miR-141-3p	0.717585	0.356398	0.361187	2.2947e-75
FOXA1	FAM66C	hsa-miR-200a-3p	0.717585	0.307432	0.410153	2.27304e-92
FOXA1	PART1	hsa-miR-141-3p	0.827432	0.415872	0.411561	2.2947e-75
FOXA1	PART1	hsa-miR-200a-3p	0.827432	0.414228	0.413204	2.27304e-92
FOXA1	PVT1	hsa-miR-141-3p	0.821975	0.385911	0.436064	2.2947e-75
FOXA1	PVT1	hsa-miR-200a-3p	0.821975	0.342023	0.479952	2.27304e-92
FOXN2	EMX2OS	hsa-miR-200b-3p	0.713117	0.45401	0.259107	9.55305e-89
FOXN3	EMX2OS	hsa-miR-200a-3p	0.787707	0.52064	0.267067	2.27304e-92
FRMD6	EGOT	hsa-miR-141-3p	0.732383	0.413642	0.31874	2.2947e-75
FRMD6	EGOT	hsa-miR-200a-3p	0.732383	0.412782	0.319601	2.27304e-92
FRMD6	EGOT	hsa-miR-200b-3p	0.732383	0.381859	0.350523	9.55305e-89
FRMD6	EGOT	hsa-miR-200c-3p	0.732383	0.378055	0.354327	4.5866e-81
FRMD6	FAM66C	hsa-miR-141-3p	0.701408	0.416298	0.28511	2.2947e-75
FRMD6	FAM66C	hsa-miR-200a-3p	0.701408	0.396679	0.30473	2.27304e-92
FRMD6	FAM66C	hsa-miR-200b-3p	0.701408	0.380792	0.320616	9.55305e-89
FRMD6	FAM66C	hsa-miR-200c-3p	0.701408	0.376929	0.324479	4.5866e-81
FRMD6	HCG18	hsa-miR-141-3p	0.702579	0.455863	0.246715	2.2947e-75
FRMD6	HCG18	hsa-miR-200a-3p	0.702579	0.420957	0.281622	2.27304e-92
FRMD6	HCG18	hsa-miR-200b-3p	0.702579	0.445165	0.257414	9.55305e-89
FRMD6	HCG18	hsa-miR-200c-3p	0.702579	0.453149	0.249429	4.5866e-81
FRMD6	PVT1	hsa-miR-141-3p	0.726644	0.332952	0.393692	2.2947e-75
FRMD6	PVT1	hsa-miR-200a-3p	0.726644	0.32308	0.403564	2.27304e-92
FRMD6	PVT1	hsa-miR-200b-3p	0.726644	0.318562	0.408082	9.55305e-89
FRMD6	PVT1	hsa-miR-200c-3p	0.726644	0.310798	0.415846	4.5866e-81
FSTL1	EMX2OS	hsa-miR-22-3p	0.772885	0.503584	0.269301	9.02349e-28
FSTL1	H19	hsa-miR-22-3p	0.712633	0.267444	0.445189	9.02349e-28
FSTL4	DGCR5	hsa-miR-200b-3p	0.713763	0.420067	0.293697	9.55305e-89
FSTL4	DGCR5	hsa-miR-200c-3p	0.713763	0.391033	0.32273	4.5866e-81
FSTL4	EGOT	hsa-miR-200b-3p	0.714546	0.36592	0.348625	9.55305e-89
FSTL4	EGOT	hsa-miR-200c-3p	0.714546	0.322269	0.392276	4.5866e-81
FYN	H19	hsa-miR-200b-3p	0.719952	0.451539	0.268413	9.55305e-89
FZD3	DGCR5	hsa-miR-205-5p	0.712399	0.404015	0.308384	4.24144e-50
FZD3	EGOT	hsa-miR-205-5p	0.838384	0.573574	0.26481	4.24144e-50
FZD3	FAM66C	hsa-miR-205-5p	0.718693	0.374688	0.344006	4.24144e-50
FZD4	H19	hsa-miR-141-3p	0.700166	0.425438	0.274728	2.2947e-75
FZD4	H19	hsa-miR-200a-3p	0.700166	0.398315	0.301852	2.27304e-92
FZD5	EMX2OS	hsa-miR-365a-3p	0.698377	0.434924	0.263454	0.211053
FZD5	EMX2OS	hsa-miR-365b-3p	0.698377	0.435016	0.263361	0.211053
GAL3ST1	PVT1	hsa-miR-200b-3p	0.693894	0.382724	0.311169	9.55305e-89
GAL3ST1	PVT1	hsa-miR-200c-3p	0.693894	0.38295	0.310944	4.5866e-81
GALNT13	EMX2OS	hsa-miR-452-5p	0.723077	0.421013	0.302063	0.000628283
GALNT13	MESTIT1	hsa-miR-452-5p	0.716844	0.448407	0.268438	0.000628283
GALNT3	HCG18	hsa-miR-22-3p	0.720639	0.462589	0.25805	9.02349e-28
GATA3	DGCR5	hsa-miR-141-3p	0.761753	0.405348	0.356405	2.2947e-75
GATA3	DGCR5	hsa-miR-200a-3p	0.761753	0.361445	0.400307	2.27304e-92
GATA3	DGCR5	hsa-miR-205-5p	0.761753	0.476623	0.28513	4.24144e-50
GATA3	EGOT	hsa-miR-141-3p	0.847961	0.581735	0.266226	2.2947e-75
GATA3	EGOT	hsa-miR-200a-3p	0.847961	0.563443	0.284518	2.27304e-92
GATA3	EGOT	hsa-miR-205-5p	0.847961	0.512572	0.335389	4.24144e-50
GATA3	FAM66C	hsa-miR-141-3p	0.726902	0.37814	0.348761	2.2947e-75
GATA3	FAM66C	hsa-miR-200a-3p	0.726902	0.322359	0.404543	2.27304e-92
GATA3	FAM66C	hsa-miR-205-5p	0.726902	0.314431	0.41247	4.24144e-50
GATA3	PART1	hsa-miR-141-3p	0.821751	0.39232	0.429431	2.2947e-75
GATA3	PART1	hsa-miR-200a-3p	0.821751	0.377389	0.444362	2.27304e-92
GATA3	PART1	hsa-miR-205-5p	0.821751	0.54466	0.277091	4.24144e-50
GATA3	PVT1	hsa-miR-141-3p	0.826484	0.397018	0.429466	2.2947e-75
GATA3	PVT1	hsa-miR-200a-3p	0.826484	0.33625	0.490234	2.27304e-92
GATA3	PVT1	hsa-miR-205-5p	0.826484	0.494439	0.332045	4.24144e-50
GATA3	SNHG10	hsa-miR-141-3p	0.686749	0.33447	0.352279	2.2947e-75
GATA3	SNHG10	hsa-miR-200a-3p	0.686749	0.295127	0.391621	2.27304e-92
GCNT2	DGCR5	hsa-miR-141-3p	0.746464	0.35508	0.391384	2.2947e-75
GCNT2	DGCR5	hsa-miR-200a-3p	0.746464	0.294113	0.452352	2.27304e-92
GCNT2	EGOT	hsa-miR-141-3p	0.779429	0.373157	0.406272	2.2947e-75
GCNT2	EGOT	hsa-miR-200a-3p	0.779429	0.332659	0.44677	2.27304e-92
GCNT2	FAM66C	hsa-miR-141-3p	0.707332	0.320323	0.387009	2.2947e-75
GCNT2	FAM66C	hsa-miR-200a-3p	0.707332	0.246599	0.460734	2.27304e-92
GCNT2	PART1	hsa-miR-141-3p	0.862867	0.51848	0.344387	2.2947e-75
GCNT2	PART1	hsa-miR-200a-3p	0.862867	0.49239	0.370478	2.27304e-92
GCNT2	PVT1	hsa-miR-141-3p	0.846217	0.448773	0.397445	2.2947e-75
GCNT2	PVT1	hsa-miR-200a-3p	0.846217	0.367748	0.47847	2.27304e-92
GJC1	EMX2OS	hsa-miR-141-3p	0.697823	0.423671	0.274152	2.2947e-75
GJC1	EMX2OS	hsa-miR-200a-3p	0.697823	0.370031	0.327793	2.27304e-92
GJC1	EMX2OS	hsa-miR-200b-3p	0.697823	0.385744	0.31208	9.55305e-89
GJC1	EMX2OS	hsa-miR-200c-3p	0.697823	0.423791	0.274033	4.5866e-81
GLI3	FAM66C	hsa-miR-200b-3p	0.686035	0.393779	0.292256	9.55305e-89
GLI3	FAM66C	hsa-miR-200c-3p	0.686035	0.385307	0.300728	4.5866e-81
GLRX	EMX2OS	hsa-miR-141-3p	0.724402	0.428956	0.295446	2.2947e-75
GLRX	EMX2OS	hsa-miR-200a-3p	0.724402	0.400367	0.324034	2.27304e-92
GLRX	H19	hsa-miR-141-3p	0.696075	0.426047	0.270028	2.2947e-75
GLRX	H19	hsa-miR-200a-3p	0.696075	0.403469	0.292606	2.27304e-92
GNAI1	EMX2OS	hsa-miR-200a-3p	0.792298	0.524729	0.267569	2.27304e-92
GNG7	DGCR5	hsa-miR-141-3p	0.801342	0.52514	0.276203	2.2947e-75
GNG7	DGCR5	hsa-miR-200a-3p	0.801342	0.495372	0.30597	2.27304e-92
GNG7	GAS5	hsa-miR-141-3p	0.712257	0.436897	0.275359	2.2947e-75
GNG7	GAS5	hsa-miR-200a-3p	0.712257	0.383192	0.329065	2.27304e-92
GNG7	PART1	hsa-miR-141-3p	0.763921	0.251959	0.511961	2.2947e-75
GNG7	PART1	hsa-miR-200a-3p	0.763921	0.242939	0.520981	2.27304e-92
GNG7	PVT1	hsa-miR-141-3p	0.772181	0.266045	0.506136	2.2947e-75
GNG7	PVT1	hsa-miR-200a-3p	0.772181	0.209399	0.562782	2.27304e-92
GNG7	SNHG8	hsa-miR-200a-3p	0.778909	0.522853	0.256056	2.27304e-92
GOLM1	DGCR5	hsa-miR-141-3p	0.697992	0.334745	0.363247	2.2947e-75
GOLM1	DGCR5	hsa-miR-200a-3p	0.697992	0.325512	0.37248	2.27304e-92
GOLM1	EGOT	hsa-miR-141-3p	0.723838	0.345927	0.377911	2.2947e-75
GOLM1	EGOT	hsa-miR-200a-3p	0.723838	0.352713	0.371125	2.27304e-92
GOLM1	PART1	hsa-miR-141-3p	0.756469	0.348199	0.40827	2.2947e-75
GOLM1	PART1	hsa-miR-200a-3p	0.756469	0.371654	0.384815	2.27304e-92
GOLM1	PVT1	hsa-miR-141-3p	0.737827	0.287151	0.450676	2.2947e-75
GOLM1	PVT1	hsa-miR-200a-3p	0.737827	0.28554	0.452287	2.27304e-92
GPC2	DGCR5	hsa-miR-141-3p	0.724052	0.434299	0.289753	2.2947e-75
GPC2	DGCR5	hsa-miR-200a-3p	0.724052	0.420704	0.303348	2.27304e-92
GPC2	PVT1	hsa-miR-141-3p	0.734307	0.36297	0.371337	2.2947e-75
GPC2	PVT1	hsa-miR-200a-3p	0.734307	0.351267	0.38304	2.27304e-92
GPC2	SNHG10	hsa-miR-200a-3p	0.720636	0.470634	0.250002	2.27304e-92
GPC6	EMX2OS	hsa-miR-200a-3p	0.767297	0.501747	0.26555	2.27304e-92
GPD1	EMX2OS	hsa-miR-200a-3p	0.746508	0.488625	0.257883	2.27304e-92
GPM6B	DGCR5	hsa-miR-141-3p	0.716591	0.312435	0.404156	2.2947e-75
GPM6B	DGCR5	hsa-miR-200a-3p	0.716591	0.277438	0.439152	2.27304e-92
GPM6B	EGOT	hsa-miR-141-3p	0.772861	0.394864	0.377996	2.2947e-75
GPM6B	EGOT	hsa-miR-200a-3p	0.772861	0.380339	0.392522	2.27304e-92
GPM6B	FAM66C	hsa-miR-141-3p	0.722856	0.385678	0.337178	2.2947e-75
GPM6B	FAM66C	hsa-miR-200a-3p	0.722856	0.34306	0.379796	2.27304e-92
GPM6B	GAS5	hsa-miR-141-3p	0.707673	0.426455	0.281218	2.2947e-75
GPM6B	GAS5	hsa-miR-200a-3p	0.707673	0.374182	0.333491	2.27304e-92
GPM6B	HCG18	hsa-miR-200a-3p	0.755373	0.459166	0.296207	2.27304e-92
GPM6B	PART1	hsa-miR-141-3p	0.810625	0.399673	0.410953	2.2947e-75
GPM6B	PART1	hsa-miR-200a-3p	0.810625	0.398127	0.412498	2.27304e-92
GPM6B	PVT1	hsa-miR-141-3p	0.795129	0.339337	0.455793	2.2947e-75
GPM6B	PVT1	hsa-miR-200a-3p	0.795129	0.297497	0.497633	2.27304e-92
GPM6B	SNHG1	hsa-miR-141-3p	0.690514	0.371229	0.319285	2.2947e-75
GPM6B	SNHG1	hsa-miR-200a-3p	0.690514	0.329113	0.361401	2.27304e-92
GPR12	PVT1	hsa-miR-200a-3p	0.704964	0.435809	0.269155	2.27304e-92
GPR27	PART1	hsa-miR-200b-3p	0.709626	0.229907	0.479718	9.55305e-89
GPR27	PART1	hsa-miR-200c-3p	0.709626	0.264834	0.444791	4.5866e-81
GPR27	PART1	hsa-miR-429	0.709626	0.391775	0.31785	4.58741e-17
GPR27	PVT1	hsa-miR-200b-3p	0.720446	0.263468	0.456978	9.55305e-89
GPR27	PVT1	hsa-miR-200c-3p	0.720446	0.280995	0.439451	4.5866e-81
GPR75	DNM1P35	hsa-miR-141-3p	0.689511	0.412423	0.277088	2.2947e-75
GPR75	DNM1P35	hsa-miR-200a-3p	0.689511	0.428406	0.261105	2.27304e-92
GPR75	EGOT	hsa-miR-141-3p	0.73828	0.39506	0.34322	2.2947e-75
GPR75	EGOT	hsa-miR-200a-3p	0.73828	0.398682	0.339598	2.27304e-92
GPR75	PVT1	hsa-miR-141-3p	0.701589	0.209781	0.491808	2.2947e-75
GPR75	PVT1	hsa-miR-200a-3p	0.701589	0.197608	0.503981	2.27304e-92
GRAMD1C	DGCR5	hsa-miR-205-5p	0.722122	0.385484	0.336639	4.24144e-50
GRAMD1C	EGOT	hsa-miR-205-5p	0.862065	0.579962	0.282103	4.24144e-50
GRAMD1C	FAM66C	hsa-miR-205-5p	0.765093	0.436922	0.328171	4.24144e-50
GRAMD1C	PART1	hsa-miR-205-5p	0.830537	0.578048	0.252489	4.24144e-50
GRAMD1C	PVT1	hsa-miR-205-5p	0.830722	0.526144	0.304578	4.24144e-50
GRHL2	DGCR5	hsa-miR-141-3p	0.714191	0.226151	0.488041	2.2947e-75
GRHL2	DGCR5	hsa-miR-200a-3p	0.714191	0.171373	0.542818	2.27304e-92
GRHL2	EGOT	hsa-miR-141-3p	0.850302	0.569359	0.280943	2.2947e-75
GRHL2	EGOT	hsa-miR-200a-3p	0.850302	0.549701	0.300601	2.27304e-92
GRHL2	FAM66C	hsa-miR-141-3p	0.732667	0.367335	0.365332	2.2947e-75
GRHL2	FAM66C	hsa-miR-200a-3p	0.732667	0.303744	0.428922	2.27304e-92
GRHL2	PART1	hsa-miR-141-3p	0.877711	0.531662	0.346049	2.2947e-75
GRHL2	PART1	hsa-miR-200a-3p	0.877711	0.527715	0.349996	2.27304e-92
GRHL2	PVT1	hsa-miR-141-3p	0.865071	0.46823	0.396841	2.2947e-75
GRHL2	PVT1	hsa-miR-200a-3p	0.865071	0.41193	0.453142	2.27304e-92
GRIP1	HCG18	hsa-miR-200b-3p	0.693357	0.379818	0.313539	9.55305e-89
GRIP1	HCG18	hsa-miR-200c-3p	0.693357	0.408997	0.28436	4.5866e-81
GRIP1	PART1	hsa-miR-200b-3p	0.731318	0.154488	0.57683	9.55305e-89
GRIP1	PART1	hsa-miR-200c-3p	0.731318	0.239138	0.49218	4.5866e-81
GRIP1	PART1	hsa-miR-429	0.731318	0.378516	0.352802	4.58741e-17
GRIP1	PVT1	hsa-miR-200b-3p	0.746463	0.206238	0.540225	9.55305e-89
GRIP1	PVT1	hsa-miR-200c-3p	0.746463	0.265729	0.480733	4.5866e-81
GTDC1	SFTA1P	hsa-miR-22-3p	0.685394	0.357494	0.327899	9.02349e-28
HAUS5	PART1	hsa-miR-22-3p	0.703203	0.43188	0.271323	9.02349e-28
HAUS5	SNHG8	hsa-miR-22-3p	0.703241	0.388637	0.314604	9.02349e-28
HNRNPD	PVT1	hsa-miR-200b-3p	0.709394	0.353689	0.355706	9.55305e-89
HNRNPD	PVT1	hsa-miR-200c-3p	0.709394	0.429474	0.27992	4.5866e-81
HNRNPF	DGCR5	hsa-miR-141-3p	0.704834	0.430177	0.274657	2.2947e-75
HNRNPF	DGCR5	hsa-miR-200a-3p	0.704834	0.383945	0.320889	2.27304e-92
HNRNPF	PVT1	hsa-miR-141-3p	0.700218	0.341365	0.358852	2.2947e-75
HNRNPF	PVT1	hsa-miR-200a-3p	0.700218	0.260433	0.439785	2.27304e-92
HNRNPH1	FAM66C	hsa-miR-200b-3p	0.727246	0.477521	0.249725	9.55305e-89
HOOK1	DGCR5	hsa-miR-196a-5p	0.709611	0.458751	0.25086	0.485358
HOOK1	DGCR5	hsa-miR-200b-3p	0.709611	0.0383572	0.671254	9.55305e-89
HOOK1	DGCR5	hsa-miR-200c-3p	0.709611	0.00929095	0.70032	4.5866e-81
HOOK1	EGOT	hsa-miR-200b-3p	0.888855	0.589585	0.29927	9.55305e-89
HOOK1	EGOT	hsa-miR-200c-3p	0.888855	0.584608	0.304247	4.5866e-81
HOOK1	FAM66C	hsa-miR-200b-3p	0.772675	0.337684	0.434991	9.55305e-89
HOOK1	FAM66C	hsa-miR-200c-3p	0.772675	0.323972	0.448703	4.5866e-81
HOOK1	HCG18	hsa-miR-200b-3p	0.691005	0.26536	0.425645	9.55305e-89
HOOK1	HCG18	hsa-miR-200c-3p	0.691005	0.302468	0.388538	4.5866e-81
HOOK1	PART1	hsa-miR-200b-3p	0.857686	0.157888	0.699798	9.55305e-89
HOOK1	PART1	hsa-miR-200c-3p	0.857686	0.189484	0.668202	4.5866e-81
HOOK1	PART1	hsa-miR-429	0.857686	0.584973	0.272713	4.58741e-17
HOOK1	PVT1	hsa-miR-200b-3p	0.857542	0.157563	0.699978	9.55305e-89
HOOK1	PVT1	hsa-miR-200c-3p	0.857542	0.0987518	0.75879	4.5866e-81
IAH1	EMX2OS	hsa-miR-200b-3p	0.785167	0.512659	0.272508	9.55305e-89
IAH1	H19	hsa-miR-200b-3p	0.699638	0.381407	0.318231	9.55305e-89
IAH1	H19	hsa-miR-200c-3p	0.699638	0.424042	0.275597	4.5866e-81
IFFO2	DGCR5	hsa-miR-141-3p	0.726537	0.388123	0.338414	2.2947e-75
IFFO2	DGCR5	hsa-miR-200a-3p	0.726537	0.336501	0.390037	2.27304e-92
IFFO2	EGOT	hsa-miR-141-3p	0.811211	0.544136	0.267076	2.2947e-75
IFFO2	EGOT	hsa-miR-200a-3p	0.811211	0.513071	0.298141	2.27304e-92
IFFO2	FAM66C	hsa-miR-141-3p	0.704145	0.382732	0.321413	2.2947e-75
IFFO2	FAM66C	hsa-miR-200a-3p	0.704145	0.325934	0.378211	2.27304e-92
IFFO2	PART1	hsa-miR-141-3p	0.748463	0.306649	0.441814	2.2947e-75
IFFO2	PART1	hsa-miR-200a-3p	0.748463	0.258442	0.490021	2.27304e-92
IFFO2	PVT1	hsa-miR-141-3p	0.790167	0.419806	0.370361	2.2947e-75
IFFO2	PVT1	hsa-miR-200a-3p	0.790167	0.345331	0.444836	2.27304e-92
IGF1R	EGOT	hsa-miR-141-3p	0.800508	0.464671	0.335838	2.2947e-75
IGF1R	EGOT	hsa-miR-200a-3p	0.800508	0.469451	0.331057	2.27304e-92
IGF1R	FAM66C	hsa-miR-141-3p	0.707368	0.345082	0.362286	2.2947e-75
IGF1R	FAM66C	hsa-miR-200a-3p	0.707368	0.3179	0.389468	2.27304e-92
IGF1R	HCG18	hsa-miR-141-3p	0.723886	0.448194	0.275692	2.2947e-75
IGF1R	HCG18	hsa-miR-200a-3p	0.723886	0.393581	0.330305	2.27304e-92
IGF1R	PART1	hsa-miR-141-3p	0.757616	0.219743	0.537873	2.2947e-75
IGF1R	PART1	hsa-miR-200a-3p	0.757616	0.254815	0.502801	2.27304e-92
IGF1R	PART1	hsa-miR-378a-3p	0.757616	0.503895	0.253721	0.028419
IGF1R	PVT1	hsa-miR-141-3p	0.779764	0.278981	0.500782	2.2947e-75
IGF1R	PVT1	hsa-miR-200a-3p	0.779764	0.274145	0.505619	2.27304e-92
IGF1R	SNHG10	hsa-miR-141-3p	0.694605	0.365629	0.328976	2.2947e-75
IGF1R	SNHG10	hsa-miR-200a-3p	0.694605	0.349292	0.345314	2.27304e-92
IGSF3	DGCR5	hsa-miR-200b-3p	0.757134	0.323679	0.433455	9.55305e-89
IGSF3	DGCR5	hsa-miR-200c-3p	0.757134	0.341476	0.415657	4.5866e-81
IGSF3	EGOT	hsa-miR-200b-3p	0.779071	0.207421	0.571649	9.55305e-89
IGSF3	EGOT	hsa-miR-200c-3p	0.779071	0.24732	0.53175	4.5866e-81
IGSF3	PART1	hsa-miR-200b-3p	0.828359	0.233908	0.594451	9.55305e-89
IGSF3	PART1	hsa-miR-200c-3p	0.828359	0.319024	0.509335	4.5866e-81
IGSF3	PART1	hsa-miR-429	0.828359	0.488888	0.339471	4.58741e-17
IGSF3	PVT1	hsa-miR-200b-3p	0.8275	0.230399	0.597101	9.55305e-89
IGSF3	PVT1	hsa-miR-200c-3p	0.8275	0.278631	0.548869	4.5866e-81
IKBKB	DGCR5	hsa-miR-200b-3p	0.69279	0.352149	0.340641	9.55305e-89
IKBKB	DGCR5	hsa-miR-200c-3p	0.69279	0.346876	0.345913	4.5866e-81
IKBKB	EGOT	hsa-miR-200b-3p	0.717838	0.337791	0.380047	9.55305e-89
IKBKB	EGOT	hsa-miR-200c-3p	0.717838	0.331619	0.386219	4.5866e-81
IKBKB	PVT1	hsa-miR-200b-3p	0.707697	0.249536	0.458161	9.55305e-89
IKBKB	PVT1	hsa-miR-200c-3p	0.707697	0.236768	0.470929	4.5866e-81
IKBKB	SNHG10	hsa-miR-200b-3p	0.702855	0.432146	0.270709	9.55305e-89
IKBKB	SNHG10	hsa-miR-200c-3p	0.702855	0.41707	0.285785	4.5866e-81
IL17RD	DGCR5	hsa-miR-22-3p	0.693382	0.406319	0.287063	9.02349e-28
IL17RD	HCG18	hsa-miR-22-3p	0.762795	0.516592	0.246203	9.02349e-28
IL17RD	PART1	hsa-miR-22-3p	0.731533	0.477248	0.254285	9.02349e-28
INPP5K	EMX2OS	hsa-miR-486-5p	0.710082	0.451416	0.258666	0.0450258
ITGA10	DGCR5	hsa-miR-22-3p	0.697991	0.435773	0.262218	9.02349e-28
ITGA10	DNM1P35	hsa-miR-22-3p	0.689058	0.422168	0.26689	9.02349e-28
ITGA10	PVT1	hsa-miR-22-3p	0.733473	0.488584	0.24489	9.02349e-28
ITPR1	EGOT	hsa-miR-200b-3p	0.758058	0.418979	0.339079	9.55305e-89
ITPR1	EGOT	hsa-miR-200c-3p	0.758058	0.44346	0.314598	4.5866e-81
ITPR1	FAM66C	hsa-miR-200b-3p	0.706546	0.372972	0.333575	9.55305e-89
ITPR1	FAM66C	hsa-miR-200c-3p	0.706546	0.388568	0.317979	4.5866e-81
ITPR1	HCG18	hsa-miR-200b-3p	0.72282	0.472623	0.250197	9.55305e-89
JAKMIP3	FAM66C	hsa-miR-200b-3p	0.699982	0.397848	0.302134	9.55305e-89
JAKMIP3	FAM66C	hsa-miR-200c-3p	0.699982	0.415815	0.284167	4.5866e-81
KANK2	H19	hsa-miR-200b-3p	0.739385	0.49322	0.246165	9.55305e-89
KATNAL1	EMX2OS	hsa-miR-141-3p	0.712656	0.462911	0.249745	2.2947e-75
KATNAL1	EMX2OS	hsa-miR-200a-3p	0.712656	0.433181	0.279475	2.27304e-92
KBTBD6	GAS5	hsa-miR-200b-3p	0.695542	0.45066	0.244882	9.55305e-89
KCNB1	AGAP11	hsa-miR-452-5p	0.688808	0.427956	0.260851	0.000628283
KDM2B	PART1	hsa-miR-141-3p	0.685148	0.233856	0.451292	2.2947e-75
KDM2B	PART1	hsa-miR-200a-3p	0.685148	0.168306	0.516842	2.27304e-92
KDM2B	PVT1	hsa-miR-141-3p	0.811425	0.564811	0.246614	2.2947e-75
KDM2B	PVT1	hsa-miR-200a-3p	0.811425	0.505316	0.306108	2.27304e-92
KIAA0408	EMX2OS	hsa-miR-200a-3p	0.777765	0.526622	0.251142	2.27304e-92
KIAA0895	EGOT	hsa-miR-200b-3p	0.841509	0.441605	0.399904	9.55305e-89
KIAA0895	EGOT	hsa-miR-200c-3p	0.841509	0.450263	0.391246	4.5866e-81
KIAA0895	FAM66C	hsa-miR-200b-3p	0.750678	0.32074	0.429938	9.55305e-89
KIAA0895	FAM66C	hsa-miR-200c-3p	0.750678	0.324996	0.425683	4.5866e-81
KIAA0895	HCG18	hsa-miR-200b-3p	0.76958	0.522527	0.247053	9.55305e-89
KIAA0895	PART1	hsa-miR-200b-3p	0.795508	0.10054	0.694967	9.55305e-89
KIAA0895	PART1	hsa-miR-200c-3p	0.795508	0.16429	0.631218	4.5866e-81
KIAA0895	PART1	hsa-miR-429	0.795508	0.477629	0.317879	4.58741e-17
KIAA0895	PVT1	hsa-miR-200b-3p	0.798372	0.113539	0.684833	9.55305e-89
KIAA0895	PVT1	hsa-miR-200c-3p	0.798372	0.127702	0.670671	4.5866e-81
KIAA0895	SNHG10	hsa-miR-200b-3p	0.703106	0.315266	0.38784	9.55305e-89
KIAA0895	SNHG10	hsa-miR-200c-3p	0.703106	0.291073	0.412033	4.5866e-81
KIF17	EMX2OS	hsa-miR-200a-3p	0.702383	0.446142	0.25624	2.27304e-92
KIF26B	DGCR5	hsa-miR-200b-3p	0.727895	0.329377	0.398517	9.55305e-89
KIF26B	DGCR5	hsa-miR-200c-3p	0.727895	0.352263	0.375632	4.5866e-81
KIF26B	EGOT	hsa-miR-200b-3p	0.707716	0.142402	0.565314	9.55305e-89
KIF26B	EGOT	hsa-miR-200c-3p	0.707716	0.18657	0.521146	4.5866e-81
KIF26B	EGOT	hsa-miR-205-5p	0.707716	0.409038	0.298678	4.24144e-50
KIF26B	PART1	hsa-miR-200b-3p	0.700982	-0.0256772	0.72666	9.55305e-89
KIF26B	PART1	hsa-miR-200c-3p	0.700982	0.0716997	0.629283	4.5866e-81
KIF26B	PART1	hsa-miR-205-5p	0.700982	0.432246	0.268736	4.24144e-50
KIF26B	PART1	hsa-miR-429	0.700982	0.235462	0.46552	4.58741e-17
KIF26B	PVT1	hsa-miR-200b-3p	0.752591	0.159605	0.592986	9.55305e-89
KIF26B	PVT1	hsa-miR-200c-3p	0.752591	0.213655	0.538937	4.5866e-81
KIF3A	PVT1	hsa-miR-141-3p	0.694765	0.28032	0.414445	2.2947e-75
KIF3A	PVT1	hsa-miR-200a-3p	0.694765	0.273555	0.42121	2.27304e-92
KRT80	DGCR5	hsa-miR-200b-3p	0.693618	0.0763379	0.61728	9.55305e-89
KRT80	DGCR5	hsa-miR-200c-3p	0.693618	0.0505977	0.64302	4.5866e-81
KRT80	EGOT	hsa-miR-200b-3p	0.818191	0.306863	0.511328	9.55305e-89
KRT80	EGOT	hsa-miR-200c-3p	0.818191	0.285171	0.53302	4.5866e-81
KRT80	PART1	hsa-miR-200b-3p	0.831395	0.166522	0.664873	9.55305e-89
KRT80	PART1	hsa-miR-200c-3p	0.831395	0.17931	0.652085	4.5866e-81
KRT80	PART1	hsa-miR-429	0.831395	0.547752	0.283643	4.58741e-17
KRT80	PVT1	hsa-miR-200b-3p	0.867368	0.345303	0.522065	9.55305e-89
KRT80	PVT1	hsa-miR-200c-3p	0.867368	0.304606	0.562763	4.5866e-81
LBH	DGCR5	hsa-miR-205-5p	0.692058	0.413607	0.278451	4.24144e-50
LBH	EGOT	hsa-miR-205-5p	0.735337	0.403475	0.331862	4.24144e-50
LBH	PART1	hsa-miR-205-5p	0.714251	0.409785	0.304466	4.24144e-50
LBH	PVT1	hsa-miR-205-5p	0.770594	0.503757	0.266836	4.24144e-50
LGALS1	EMX2OS	hsa-miR-22-3p	0.741049	0.390459	0.35059	9.02349e-28
LGALS1	H19	hsa-miR-22-3p	0.781987	0.376631	0.405356	9.02349e-28
LGALS1	SFTA1P	hsa-miR-22-3p	0.705063	0.304543	0.400521	9.02349e-28
LPAR3	HCG18	hsa-miR-200a-3p	0.761018	0.488608	0.27241	2.27304e-92
LPAR3	PART1	hsa-miR-141-3p	0.730704	0.23732	0.493384	2.2947e-75
LPAR3	PART1	hsa-miR-200a-3p	0.730704	0.208719	0.521985	2.27304e-92
LPAR3	PVT1	hsa-miR-141-3p	0.774129	0.355838	0.418292	2.2947e-75
LPAR3	PVT1	hsa-miR-200a-3p	0.774129	0.295955	0.478175	2.27304e-92
LPAR3	RFPL1S	hsa-miR-141-3p	0.687459	0.429365	0.258093	2.2947e-75
LPAR3	SNHG1	hsa-miR-141-3p	0.714412	0.444952	0.269459	2.2947e-75
LPAR3	SNHG1	hsa-miR-200a-3p	0.714412	0.404336	0.310076	2.27304e-92
LRRC1	DGCR5	hsa-miR-141-3p	0.720523	0.296753	0.423771	2.2947e-75
LRRC1	DGCR5	hsa-miR-200a-3p	0.720523	0.234089	0.486434	2.27304e-92
LRRC1	DGCR5	hsa-miR-22-3p	0.720523	0.456824	0.263699	9.02349e-28
LRRC1	EGOT	hsa-miR-141-3p	0.76841	0.35486	0.413551	2.2947e-75
LRRC1	EGOT	hsa-miR-200a-3p	0.76841	0.315083	0.453327	2.27304e-92
LRRC1	FAM66C	hsa-miR-141-3p	0.778212	0.508356	0.269856	2.2947e-75
LRRC1	FAM66C	hsa-miR-200a-3p	0.778212	0.455676	0.322536	2.27304e-92
LRRC1	GAS5	hsa-miR-200a-3p	0.745602	0.445705	0.299897	2.27304e-92
LRRC1	GAS5	hsa-miR-22-3p	0.745602	0.472092	0.273509	9.02349e-28
LRRC1	HCG18	hsa-miR-141-3p	0.73014	0.456908	0.273232	2.2947e-75
LRRC1	HCG18	hsa-miR-200a-3p	0.73014	0.372003	0.358136	2.27304e-92
LRRC1	HCG18	hsa-miR-22-3p	0.73014	0.446013	0.284127	9.02349e-28
LRRC1	PART1	hsa-miR-141-3p	0.864316	0.539477	0.324839	2.2947e-75
LRRC1	PART1	hsa-miR-200a-3p	0.864316	0.515199	0.349117	2.27304e-92
LRRC1	PVT1	hsa-miR-141-3p	0.882387	0.593471	0.288916	2.2947e-75
LRRC1	PVT1	hsa-miR-200a-3p	0.882387	0.538848	0.343539	2.27304e-92
LRRC1	SNHG1	hsa-miR-141-3p	0.740672	0.478053	0.26262	2.2947e-75
LRRC1	SNHG1	hsa-miR-200a-3p	0.740672	0.426932	0.31374	2.27304e-92
LRRC1	SNHG1	hsa-miR-22-3p	0.740672	0.452987	0.287686	9.02349e-28
LRRC1	SNHG10	hsa-miR-141-3p	0.703385	0.375607	0.327778	2.2947e-75
LRRC1	SNHG10	hsa-miR-200a-3p	0.703385	0.331695	0.37169	2.27304e-92
LRRC1	SNHG8	hsa-miR-141-3p	0.714666	0.37675	0.337916	2.2947e-75
LRRC1	SNHG8	hsa-miR-200a-3p	0.714666	0.343753	0.370914	2.27304e-92
LRRC1	SNHG8	hsa-miR-22-3p	0.714666	0.393319	0.321347	9.02349e-28
LYPD6	DGCR5	hsa-miR-141-3p	0.684631	0.206848	0.477783	2.2947e-75
LYPD6	DGCR5	hsa-miR-200a-3p	0.684631	0.17815	0.506481	2.27304e-92
LYPD6	DGCR5	hsa-miR-205-5p	0.684631	0.332051	0.35258	4.24144e-50
LYPD6	EGOT	hsa-miR-141-3p	0.847344	0.583278	0.264066	2.2947e-75
LYPD6	EGOT	hsa-miR-200a-3p	0.847344	0.576713	0.270631	2.27304e-92
LYPD6	EGOT	hsa-miR-205-5p	0.847344	0.581893	0.265451	4.24144e-50
LYPD6	FAM66C	hsa-miR-141-3p	0.715299	0.353068	0.362232	2.2947e-75
LYPD6	FAM66C	hsa-miR-200a-3p	0.715299	0.313517	0.401782	2.27304e-92
LYPD6	FAM66C	hsa-miR-205-5p	0.715299	0.3528	0.362499	4.24144e-50
LYPD6	PART1	hsa-miR-141-3p	0.797251	0.319932	0.477319	2.2947e-75
LYPD6	PART1	hsa-miR-200a-3p	0.797251	0.334675	0.462577	2.27304e-92
LYPD6	PART1	hsa-miR-205-5p	0.797251	0.519763	0.277488	4.24144e-50
LYPD6	PVT1	hsa-miR-141-3p	0.793669	0.294834	0.498835	2.2947e-75
LYPD6	PVT1	hsa-miR-200a-3p	0.793669	0.265609	0.528061	2.27304e-92
LYPD6	PVT1	hsa-miR-205-5p	0.793669	0.468701	0.324968	4.24144e-50
MAGED4	DGCR5	hsa-miR-141-3p	0.792371	0.516668	0.275703	2.2947e-75
MAGED4	DGCR5	hsa-miR-200a-3p	0.792371	0.48491	0.307461	2.27304e-92
MAGED4	EGOT	hsa-miR-141-3p	0.728281	0.305955	0.422326	2.2947e-75
MAGED4	EGOT	hsa-miR-200a-3p	0.728281	0.277946	0.450334	2.27304e-92
MAGED4	GAS5	hsa-miR-141-3p	0.729117	0.480942	0.248175	2.2947e-75
MAGED4	GAS5	hsa-miR-200a-3p	0.729117	0.431193	0.297924	2.27304e-92
MAGED4	PART1	hsa-miR-141-3p	0.766034	0.302622	0.463412	2.2947e-75
MAGED4	PART1	hsa-miR-200a-3p	0.766034	0.282448	0.483586	2.27304e-92
MAGED4	PVT1	hsa-miR-141-3p	0.778357	0.330368	0.447989	2.2947e-75
MAGED4	PVT1	hsa-miR-200a-3p	0.778357	0.270976	0.507381	2.27304e-92
MAGED4	SNHG8	hsa-miR-141-3p	0.726124	0.430587	0.295538	2.2947e-75
MAGED4	SNHG8	hsa-miR-200a-3p	0.726124	0.4084	0.317725	2.27304e-92
MAGED4B	DGCR5	hsa-miR-141-3p	0.803337	0.518681	0.284656	2.2947e-75
MAGED4B	DGCR5	hsa-miR-200a-3p	0.803337	0.47966	0.323677	2.27304e-92
MAGED4B	EGOT	hsa-miR-141-3p	0.73731	0.269953	0.467357	2.2947e-75
MAGED4B	EGOT	hsa-miR-200a-3p	0.73731	0.234662	0.502648	2.27304e-92
MAGED4B	GAS5	hsa-miR-141-3p	0.705606	0.414014	0.291592	2.2947e-75
MAGED4B	GAS5	hsa-miR-200a-3p	0.705606	0.348422	0.357184	2.27304e-92
MAGED4B	PART1	hsa-miR-141-3p	0.794025	0.306469	0.487556	2.2947e-75
MAGED4B	PART1	hsa-miR-200a-3p	0.794025	0.282854	0.511171	2.27304e-92
MAGED4B	PVT1	hsa-miR-141-3p	0.818385	0.377037	0.441348	2.2947e-75
MAGED4B	PVT1	hsa-miR-200a-3p	0.818385	0.307624	0.510761	2.27304e-92
MAGED4B	SNHG8	hsa-miR-141-3p	0.740213	0.440899	0.299314	2.2947e-75
MAGED4B	SNHG8	hsa-miR-200a-3p	0.740213	0.415342	0.324871	2.27304e-92
MANEAL	SNHG8	hsa-miR-22-3p	0.708056	0.404099	0.303957	9.02349e-28
MAP3K1	EGOT	hsa-miR-200b-3p	0.756211	0.321977	0.434234	9.55305e-89
MAP3K1	EGOT	hsa-miR-200c-3p	0.756211	0.339916	0.416295	4.5866e-81
MAP3K1	FAM66C	hsa-miR-200b-3p	0.748814	0.409856	0.338957	9.55305e-89
MAP3K1	FAM66C	hsa-miR-200c-3p	0.748814	0.418358	0.330455	4.5866e-81
MAP3K1	PART1	hsa-miR-200b-3p	0.717459	0.0963297	0.621129	9.55305e-89
MAP3K1	PART1	hsa-miR-200c-3p	0.717459	0.151328	0.566131	4.5866e-81
MAP3K1	PART1	hsa-miR-429	0.717459	0.335867	0.381591	4.58741e-17
MAP3K1	PVT1	hsa-miR-200b-3p	0.76526	0.260457	0.504803	9.55305e-89
MAP3K1	PVT1	hsa-miR-200c-3p	0.76526	0.283475	0.481785	4.5866e-81
MAP3K1	SNHG10	hsa-miR-200b-3p	0.719216	0.417575	0.301641	9.55305e-89
MAP3K1	SNHG10	hsa-miR-200c-3p	0.719216	0.408012	0.311203	4.5866e-81
MAP3K9	DGCR5	hsa-miR-205-5p	0.724673	0.422774	0.301899	4.24144e-50
MAP3K9	EGOT	hsa-miR-205-5p	0.855359	0.607209	0.24815	4.24144e-50
MAP3K9	FAM66C	hsa-miR-205-5p	0.751502	0.439563	0.311939	4.24144e-50
MAP3K9	PART1	hsa-miR-205-5p	0.776526	0.472639	0.303886	4.24144e-50
MAP3K9	PVT1	hsa-miR-205-5p	0.820107	0.539898	0.28021	4.24144e-50
MAP4K4	EMX2OS	hsa-miR-141-3p	0.712225	0.463037	0.249187	2.2947e-75
MAP4K4	EMX2OS	hsa-miR-200a-3p	0.712225	0.448607	0.263618	2.27304e-92
MARK1	EMX2OS	hsa-miR-141-3p	0.74119	0.4885	0.252689	2.2947e-75
MARK1	EMX2OS	hsa-miR-200a-3p	0.74119	0.447235	0.293955	2.27304e-92
MBNL1	EMX2OS	hsa-miR-200a-3p	0.738466	0.490285	0.248181	2.27304e-92
MBOAT2	PART1	hsa-miR-141-3p	0.696345	0.300348	0.395998	2.2947e-75
MBOAT2	PART1	hsa-miR-200a-3p	0.696345	0.295892	0.400453	2.27304e-92
MBOAT2	PART1	hsa-miR-200b-3p	0.696345	0.202192	0.494153	9.55305e-89
MBOAT2	PART1	hsa-miR-200c-3p	0.696345	0.233386	0.462959	4.5866e-81
MBOAT2	PART1	hsa-miR-429	0.696345	0.369251	0.327094	4.58741e-17
MGAT4A	EGOT	hsa-miR-205-5p	0.761065	0.475168	0.285898	4.24144e-50
MLLT3	EGOT	hsa-miR-200b-3p	0.688286	0.335898	0.352388	9.55305e-89
MLLT3	EGOT	hsa-miR-200c-3p	0.688286	0.3923	0.295986	4.5866e-81
MN1	EMX2OS	hsa-miR-200a-3p	0.740549	0.495466	0.245084	2.27304e-92
MORN4	DGCR5	hsa-miR-205-5p	0.687966	0.360845	0.327121	4.24144e-50
MORN4	EGOT	hsa-miR-205-5p	0.731621	0.308019	0.423602	4.24144e-50
MORN4	FAM66C	hsa-miR-205-5p	0.701053	0.346348	0.354704	4.24144e-50
MORN4	PART1	hsa-miR-205-5p	0.775975	0.490424	0.285551	4.24144e-50
MORN4	PVT1	hsa-miR-205-5p	0.751968	0.39454	0.357428	4.24144e-50
MORN4	SNHG1	hsa-miR-205-5p	0.688893	0.404457	0.284436	4.24144e-50
MSH6	PVT1	hsa-miR-141-3p	0.70038	0.320447	0.379933	2.2947e-75
MSH6	PVT1	hsa-miR-200a-3p	0.70038	0.27419	0.42619	2.27304e-92
MSH6	SNHG1	hsa-miR-200a-3p	0.699225	0.436216	0.263009	2.27304e-92
MYB	DGCR5	hsa-miR-200b-3p	0.684343	0.0608351	0.623508	9.55305e-89
MYB	DGCR5	hsa-miR-200c-3p	0.684343	0.022607	0.661736	4.5866e-81
MYB	EGOT	hsa-miR-200b-3p	0.860532	0.487056	0.373476	9.55305e-89
MYB	EGOT	hsa-miR-200c-3p	0.860532	0.467531	0.393	4.5866e-81
MYB	FAM66C	hsa-miR-200b-3p	0.712795	0.172042	0.540753	9.55305e-89
MYB	FAM66C	hsa-miR-200c-3p	0.712795	0.141149	0.571646	4.5866e-81
MYB	PART1	hsa-miR-200b-3p	0.793337	0.00916008	0.784177	9.55305e-89
MYB	PART1	hsa-miR-200c-3p	0.793337	0.00019241	0.793144	4.5866e-81
MYB	PART1	hsa-miR-429	0.793337	0.424164	0.369173	4.58741e-17
MYB	PVT1	hsa-miR-200b-3p	0.825927	0.165933	0.659994	9.55305e-89
MYB	PVT1	hsa-miR-200c-3p	0.825927	0.0949356	0.730992	4.5866e-81
MYB	SNHG10	hsa-miR-200b-3p	0.690115	0.260786	0.429329	9.55305e-89
MYB	SNHG10	hsa-miR-200c-3p	0.690115	0.207226	0.482889	4.5866e-81
MYLK	EGOT	hsa-miR-200b-3p	0.764292	0.321427	0.442865	9.55305e-89
MYLK	EGOT	hsa-miR-200c-3p	0.764292	0.314534	0.449758	4.5866e-81
MYLK	FAM66C	hsa-miR-200b-3p	0.745721	0.389113	0.356608	9.55305e-89
MYLK	FAM66C	hsa-miR-200c-3p	0.745721	0.383286	0.362435	4.5866e-81
MYLK	PART1	hsa-miR-200b-3p	0.777628	0.267913	0.509715	9.55305e-89
MYLK	PART1	hsa-miR-200c-3p	0.777628	0.280202	0.497426	4.5866e-81
MYLK	PART1	hsa-miR-429	0.777628	0.515405	0.262223	4.58741e-17
MYLK	PVT1	hsa-miR-200b-3p	0.743995	0.149456	0.594539	9.55305e-89
MYLK	PVT1	hsa-miR-200c-3p	0.743995	0.130731	0.613264	4.5866e-81
MYO5B	DGCR5	hsa-miR-205-5p	0.775656	0.525333	0.250323	4.24144e-50
MYO5B	EGOT	hsa-miR-205-5p	0.838406	0.533771	0.304635	4.24144e-50
MYO5B	FAM66C	hsa-miR-205-5p	0.756841	0.433251	0.32359	4.24144e-50
NAT8L	EMX2OS	hsa-miR-452-5p	0.713183	0.298067	0.415116	0.000628283
NCKAP5	EGOT	hsa-miR-141-3p	0.72495	0.345488	0.379462	2.2947e-75
NCKAP5	EGOT	hsa-miR-200a-3p	0.72495	0.334117	0.390833	2.27304e-92
NCKAP5	FAM66C	hsa-miR-141-3p	0.722062	0.426338	0.295724	2.2947e-75
NCKAP5	FAM66C	hsa-miR-200a-3p	0.722062	0.39606	0.326001	2.27304e-92
NCKAP5	HCG18	hsa-miR-200a-3p	0.729912	0.44025	0.289662	2.27304e-92
NCKAP5	PART1	hsa-miR-141-3p	0.714186	0.22423	0.489956	2.2947e-75
NCKAP5	PART1	hsa-miR-200a-3p	0.714186	0.222505	0.491681	2.27304e-92
NCKAP5	PVT1	hsa-miR-141-3p	0.77135	0.37897	0.392379	2.2947e-75
NCKAP5	PVT1	hsa-miR-200a-3p	0.77135	0.353819	0.417531	2.27304e-92
NDN	H19	hsa-miR-200b-3p	0.695985	0.412329	0.283656	9.55305e-89
NEK10	EGOT	hsa-miR-200b-3p	0.837372	0.551708	0.285664	9.55305e-89
NEK10	EGOT	hsa-miR-200c-3p	0.837372	0.56624	0.271132	4.5866e-81
NEO1	EGOT	hsa-miR-200b-3p	0.686859	0.20626	0.480599	9.55305e-89
NEO1	EGOT	hsa-miR-200c-3p	0.686859	0.23896	0.4479	4.5866e-81
NEO1	PVT1	hsa-miR-200b-3p	0.724213	0.227003	0.49721	9.55305e-89
NEO1	PVT1	hsa-miR-200c-3p	0.724213	0.268387	0.455827	4.5866e-81
NFASC	DGCR5	hsa-miR-141-3p	0.735734	0.321428	0.414307	2.2947e-75
NFASC	DGCR5	hsa-miR-200a-3p	0.735734	0.311284	0.424451	2.27304e-92
NFASC	DGCR5	hsa-miR-200b-3p	0.735734	0.313376	0.422359	9.55305e-89
NFASC	DGCR5	hsa-miR-200c-3p	0.735734	0.310619	0.425115	4.5866e-81
NFASC	EGOT	hsa-miR-141-3p	0.806852	0.450725	0.356127	2.2947e-75
NFASC	EGOT	hsa-miR-200a-3p	0.806852	0.460035	0.346817	2.27304e-92
NFASC	EGOT	hsa-miR-200b-3p	0.806852	0.386157	0.420695	9.55305e-89
NFASC	EGOT	hsa-miR-200c-3p	0.806852	0.384911	0.421941	4.5866e-81
NFASC	FAM66C	hsa-miR-141-3p	0.688762	0.268042	0.420719	2.2947e-75
NFASC	FAM66C	hsa-miR-200a-3p	0.688762	0.243348	0.445413	2.27304e-92
NFASC	FAM66C	hsa-miR-200b-3p	0.688762	0.198021	0.490741	9.55305e-89
NFASC	FAM66C	hsa-miR-200c-3p	0.688762	0.19477	0.493992	4.5866e-81
NFASC	FAM66C	hsa-miR-429	0.688762	0.436588	0.252174	4.58741e-17
NFASC	HCG18	hsa-miR-141-3p	0.688902	0.350292	0.338609	2.2947e-75
NFASC	HCG18	hsa-miR-200a-3p	0.688902	0.288901	0.4	2.27304e-92
NFASC	HCG18	hsa-miR-200b-3p	0.688902	0.331146	0.357755	9.55305e-89
NFASC	HCG18	hsa-miR-200c-3p	0.688902	0.349849	0.339053	4.5866e-81
NFASC	PART1	hsa-miR-141-3p	0.742271	0.0840668	0.658204	2.2947e-75
NFASC	PART1	hsa-miR-200a-3p	0.742271	0.147482	0.594789	2.27304e-92
NFASC	PART1	hsa-miR-200b-3p	0.742271	0.023788	0.718483	9.55305e-89
NFASC	PART1	hsa-miR-200c-3p	0.742271	0.0595731	0.682698	4.5866e-81
NFASC	PART1	hsa-miR-429	0.742271	0.308389	0.433882	4.58741e-17
NFASC	PVT1	hsa-miR-141-3p	0.795273	0.2571	0.538172	2.2947e-75
NFASC	PVT1	hsa-miR-200a-3p	0.795273	0.265156	0.530116	2.27304e-92
NFASC	PVT1	hsa-miR-200b-3p	0.795273	0.229306	0.565967	9.55305e-89
NFASC	PVT1	hsa-miR-200c-3p	0.795273	0.220681	0.574592	4.5866e-81
NGEF	PART1	hsa-miR-200b-3p	0.730638	0.450192	0.280446	9.55305e-89
NGEF	PART1	hsa-miR-200c-3p	0.730638	0.454546	0.276092	4.5866e-81
NGEF	PVT1	hsa-miR-200b-3p	0.733305	0.457695	0.27561	9.55305e-89
NGEF	PVT1	hsa-miR-200c-3p	0.733305	0.462897	0.270408	4.5866e-81
NIPAL3	DGCR5	hsa-miR-141-3p	0.696508	0.223327	0.473181	2.2947e-75
NIPAL3	DGCR5	hsa-miR-200a-3p	0.696508	0.185298	0.511209	2.27304e-92
NIPAL3	EGOT	hsa-miR-141-3p	0.766737	0.341073	0.425664	2.2947e-75
NIPAL3	EGOT	hsa-miR-200a-3p	0.766737	0.327864	0.438874	2.27304e-92
NIPAL3	FAM66C	hsa-miR-141-3p	0.721858	0.361266	0.360592	2.2947e-75
NIPAL3	FAM66C	hsa-miR-200a-3p	0.721858	0.314034	0.407824	2.27304e-92
NIPAL3	HCG18	hsa-miR-141-3p	0.740326	0.479913	0.260413	2.2947e-75
NIPAL3	HCG18	hsa-miR-200a-3p	0.740326	0.406641	0.333685	2.27304e-92
NIPAL3	PART1	hsa-miR-141-3p	0.819644	0.374688	0.444956	2.2947e-75
NIPAL3	PART1	hsa-miR-200a-3p	0.819644	0.379517	0.440127	2.27304e-92
NIPAL3	PVT1	hsa-miR-141-3p	0.759155	0.14805	0.611105	2.2947e-75
NIPAL3	PVT1	hsa-miR-200a-3p	0.759155	0.0917845	0.667371	2.27304e-92
NPAS3	EGOT	hsa-miR-141-3p	0.692053	0.398224	0.293829	2.2947e-75
NPAS3	EGOT	hsa-miR-200a-3p	0.692053	0.351871	0.340182	2.27304e-92
NPAS3	PVT1	hsa-miR-141-3p	0.700113	0.37372	0.326393	2.2947e-75
NPAS3	PVT1	hsa-miR-200a-3p	0.700113	0.295879	0.404234	2.27304e-92
NPAS3	SNHG1	hsa-miR-200a-3p	0.692436	0.430959	0.261477	2.27304e-92
NPNT	PVT1	hsa-miR-200b-3p	0.687434	0.259512	0.427921	9.55305e-89
NPNT	PVT1	hsa-miR-200c-3p	0.687434	0.2909	0.396533	4.5866e-81
NR6A1	EGOT	hsa-miR-141-3p	0.720406	0.469999	0.250407	2.2947e-75
NRG1	DGCR5	hsa-miR-200b-3p	0.783928	0.414111	0.369817	9.55305e-89
NRG1	DGCR5	hsa-miR-200c-3p	0.783928	0.411413	0.372515	4.5866e-81
NRG1	EGOT	hsa-miR-200b-3p	0.832726	0.417386	0.41534	9.55305e-89
NRG1	EGOT	hsa-miR-200c-3p	0.832726	0.417293	0.415433	4.5866e-81
NRG1	FAM66C	hsa-miR-200b-3p	0.71122	0.208432	0.502788	9.55305e-89
NRG1	FAM66C	hsa-miR-200c-3p	0.71122	0.206384	0.504836	4.5866e-81
NRG1	PART1	hsa-miR-200b-3p	0.821589	0.231172	0.590417	9.55305e-89
NRG1	PART1	hsa-miR-200c-3p	0.821589	0.26735	0.554239	4.5866e-81
NRG1	PART1	hsa-miR-429	0.821589	0.51409	0.307499	4.58741e-17
NRG1	PVT1	hsa-miR-200b-3p	0.829679	0.266473	0.563206	9.55305e-89
NRG1	PVT1	hsa-miR-200c-3p	0.829679	0.260183	0.569496	4.5866e-81
NRP1	H19	hsa-miR-141-3p	0.728525	0.458576	0.269949	2.2947e-75
NRP1	H19	hsa-miR-200a-3p	0.728525	0.430792	0.297733	2.27304e-92
NUP35	HCG18	hsa-miR-200b-3p	0.688675	0.400084	0.288591	9.55305e-89
NUP35	HCG18	hsa-miR-200c-3p	0.688675	0.420379	0.268296	4.5866e-81
NUP35	PART1	hsa-miR-200b-3p	0.729784	0.262425	0.467359	9.55305e-89
NUP35	PART1	hsa-miR-200c-3p	0.729784	0.309164	0.42062	4.5866e-81
NUP35	PART1	hsa-miR-429	0.729784	0.478869	0.250914	4.58741e-17
NUP35	PVT1	hsa-miR-200b-3p	0.7842	0.433904	0.350296	9.55305e-89
NUP35	PVT1	hsa-miR-200c-3p	0.7842	0.465262	0.318938	4.5866e-81
OCLN	DGCR5	hsa-miR-200b-3p	0.748143	0.241726	0.506417	9.55305e-89
OCLN	DGCR5	hsa-miR-200c-3p	0.748143	0.242154	0.505989	4.5866e-81
OCLN	EGOT	hsa-miR-200b-3p	0.863182	0.473607	0.389575	9.55305e-89
OCLN	EGOT	hsa-miR-200c-3p	0.863182	0.472906	0.390276	4.5866e-81
OCLN	FAM66C	hsa-miR-200b-3p	0.76044	0.305847	0.454592	9.55305e-89
OCLN	FAM66C	hsa-miR-200c-3p	0.76044	0.3035	0.456939	4.5866e-81
OCLN	HCG18	hsa-miR-200b-3p	0.744899	0.459008	0.285891	9.55305e-89
OCLN	HCG18	hsa-miR-200c-3p	0.744899	0.483441	0.261457	4.5866e-81
OCLN	PART1	hsa-miR-200b-3p	0.850227	0.202649	0.647578	9.55305e-89
OCLN	PART1	hsa-miR-200c-3p	0.850227	0.262237	0.58799	4.5866e-81
OCLN	PART1	hsa-miR-429	0.850227	0.546982	0.303245	4.58741e-17
OCLN	PVT1	hsa-miR-200b-3p	0.862546	0.269919	0.592627	9.55305e-89
OCLN	PVT1	hsa-miR-200c-3p	0.862546	0.267786	0.594761	4.5866e-81
PAK3	EGOT	hsa-miR-200b-3p	0.703399	0.304435	0.398964	9.55305e-89
PAK3	EGOT	hsa-miR-200c-3p	0.703399	0.32662	0.376779	4.5866e-81
PAK3	FAM66C	hsa-miR-200b-3p	0.727745	0.432467	0.295278	9.55305e-89
PAK3	FAM66C	hsa-miR-200c-3p	0.727745	0.444523	0.283222	4.5866e-81
PAK6	DGCR5	hsa-miR-200b-3p	0.795189	0.438332	0.356857	9.55305e-89
PAK6	DGCR5	hsa-miR-200c-3p	0.795189	0.431479	0.36371	4.5866e-81
PAK6	EGOT	hsa-miR-200b-3p	0.837149	0.41183	0.425319	9.55305e-89
PAK6	EGOT	hsa-miR-200c-3p	0.837149	0.403934	0.433216	4.5866e-81
PAK6	PART1	hsa-miR-200b-3p	0.810692	0.134416	0.676276	9.55305e-89
PAK6	PART1	hsa-miR-200c-3p	0.810692	0.163352	0.64734	4.5866e-81
PAK6	PART1	hsa-miR-429	0.810692	0.476074	0.334617	4.58741e-17
PAK6	PVT1	hsa-miR-200b-3p	0.832304	0.23359	0.598714	9.55305e-89
PAK6	PVT1	hsa-miR-200c-3p	0.832304	0.209713	0.622591	4.5866e-81
PAK6	SNHG10	hsa-miR-200b-3p	0.688108	0.265036	0.423072	9.55305e-89
PAK6	SNHG10	hsa-miR-200c-3p	0.688108	0.22711	0.460998	4.5866e-81
PALM	EMX2OS	hsa-miR-22-3p	0.702461	0.375286	0.327176	9.02349e-28
PALM	H19	hsa-miR-22-3p	0.710709	0.305703	0.405006	9.02349e-28
PAQR5	PVT1	hsa-miR-141-3p	0.71502	0.430365	0.284655	2.2947e-75
PAQR5	PVT1	hsa-miR-200a-3p	0.71502	0.464508	0.250512	2.27304e-92
PAQR5	PVT1	hsa-miR-200b-3p	0.71502	0.411949	0.30307	9.55305e-89
PAQR5	PVT1	hsa-miR-200c-3p	0.71502	0.40268	0.31234	4.5866e-81
PARD6B	EGOT	hsa-miR-200b-3p	0.787616	0.379242	0.408374	9.55305e-89
PARD6B	EGOT	hsa-miR-200c-3p	0.787616	0.342553	0.445063	4.5866e-81
PARD6B	EGOT	hsa-miR-205-5p	0.787616	0.502703	0.284913	4.24144e-50
PARD6B	PART1	hsa-miR-200b-3p	0.702667	-0.0162588	0.718926	9.55305e-89
PARD6B	PART1	hsa-miR-200c-3p	0.702667	-0.050492	0.753159	4.5866e-81
PARD6B	PART1	hsa-miR-205-5p	0.702667	0.364931	0.337736	4.24144e-50
PARD6B	PART1	hsa-miR-429	0.702667	0.401739	0.300928	4.58741e-17
PARD6B	PVT1	hsa-miR-200b-3p	0.698215	-0.0318531	0.730068	9.55305e-89
PARD6B	PVT1	hsa-miR-200c-3p	0.698215	-0.121015	0.81923	4.5866e-81
PARD6B	PVT1	hsa-miR-205-5p	0.698215	0.316627	0.381587	4.24144e-50
PDCD4	HCG18	hsa-miR-141-3p	0.740766	0.492632	0.248133	2.2947e-75
PDCD4	HCG18	hsa-miR-200a-3p	0.740766	0.432875	0.30789	2.27304e-92
PDCD4	PART1	hsa-miR-141-3p	0.82637	0.475556	0.350814	2.2947e-75
PDCD4	PART1	hsa-miR-200a-3p	0.82637	0.470023	0.356347	2.27304e-92
PDCD4	PVT1	hsa-miR-141-3p	0.785264	0.33913	0.446133	2.2947e-75
PDCD4	PVT1	hsa-miR-200a-3p	0.785264	0.294522	0.490742	2.27304e-92
PDCD4	SNHG1	hsa-miR-141-3p	0.736673	0.480547	0.256127	2.2947e-75
PDCD4	SNHG1	hsa-miR-200a-3p	0.736673	0.443585	0.293089	2.27304e-92
PDCD4	SNHG8	hsa-miR-141-3p	0.757328	0.496504	0.260824	2.2947e-75
PDCD4	SNHG8	hsa-miR-200a-3p	0.757328	0.479524	0.277804	2.27304e-92
PGRMC2	EMX2OS	hsa-miR-200a-3p	0.767081	0.505047	0.262034	2.27304e-92
PHF12	DGCR5	hsa-miR-200b-3p	0.702282	0.331793	0.370489	9.55305e-89
PHF12	DGCR5	hsa-miR-200c-3p	0.702282	0.332517	0.369765	4.5866e-81
PHF12	DGCR5	hsa-miR-22-3p	0.702282	0.408673	0.293608	9.02349e-28
PHF12	DNM1P35	hsa-miR-200b-3p	0.696609	0.411168	0.285442	9.55305e-89
PHF12	DNM1P35	hsa-miR-200c-3p	0.696609	0.422563	0.274047	4.5866e-81
PHF12	DNM1P35	hsa-miR-22-3p	0.696609	0.401215	0.295395	9.02349e-28
PHF12	EGOT	hsa-miR-200b-3p	0.796093	0.483313	0.312781	9.55305e-89
PHF12	EGOT	hsa-miR-200c-3p	0.796093	0.486258	0.309835	4.5866e-81
PHF12	PVT1	hsa-miR-200b-3p	0.728372	0.224502	0.50387	9.55305e-89
PHF12	PVT1	hsa-miR-200c-3p	0.728372	0.224364	0.504008	4.5866e-81
PHF12	PVT1	hsa-miR-22-3p	0.728372	0.442805	0.285567	9.02349e-28
PHF12	SNHG1	hsa-miR-200b-3p	0.703448	0.447248	0.256201	9.55305e-89
PHF12	SNHG1	hsa-miR-200c-3p	0.703448	0.453681	0.249767	4.5866e-81
PHF12	SNHG1	hsa-miR-22-3p	0.703448	0.357006	0.346443	9.02349e-28
PHF12	SNHG10	hsa-miR-200b-3p	0.706963	0.414769	0.292194	9.55305e-89
PHF12	SNHG10	hsa-miR-200c-3p	0.706963	0.40128	0.305683	4.5866e-81
PHF21B	DGCR5	hsa-miR-200b-3p	0.700122	0.381994	0.318127	9.55305e-89
PHF21B	DGCR5	hsa-miR-200c-3p	0.700122	0.371356	0.328765	4.5866e-81
PHF21B	PVT1	hsa-miR-200b-3p	0.702151	0.264325	0.437826	9.55305e-89
PHF21B	PVT1	hsa-miR-200c-3p	0.702151	0.239489	0.462662	4.5866e-81
PHYHIPL	EGOT	hsa-miR-205-5p	0.694722	0.429485	0.265237	4.24144e-50
PKP1	PART1	hsa-miR-200b-3p	0.705731	0.185625	0.520106	9.55305e-89
PKP1	PART1	hsa-miR-200c-3p	0.705731	0.240103	0.465628	4.5866e-81
PKP1	PART1	hsa-miR-429	0.705731	0.337778	0.367953	4.58741e-17
PKP1	PVT1	hsa-miR-200b-3p	0.710176	0.199803	0.510373	9.55305e-89
PKP1	PVT1	hsa-miR-200c-3p	0.710176	0.234253	0.475924	4.5866e-81
PLEKHA6	DGCR5	hsa-miR-200b-3p	0.805672	0.465532	0.34014	9.55305e-89
PLEKHA6	DGCR5	hsa-miR-200c-3p	0.805672	0.461597	0.344075	4.5866e-81
PLEKHA6	EGOT	hsa-miR-200b-3p	0.822448	0.333113	0.489335	9.55305e-89
PLEKHA6	EGOT	hsa-miR-200c-3p	0.822448	0.335339	0.487109	4.5866e-81
PLEKHA6	PART1	hsa-miR-200b-3p	0.856788	0.307171	0.549617	9.55305e-89
PLEKHA6	PART1	hsa-miR-200c-3p	0.856788	0.349753	0.507035	4.5866e-81
PLEKHA6	PART1	hsa-miR-429	0.856788	0.589061	0.267727	4.58741e-17
PLEKHA6	PVT1	hsa-miR-200b-3p	0.831503	0.185027	0.646476	9.55305e-89
PLEKHA6	PVT1	hsa-miR-200c-3p	0.831503	0.181055	0.650449	4.5866e-81
PLEKHA7	DNM1P35	hsa-miR-141-3p	0.68975	0.426716	0.263034	2.2947e-75
PLEKHA7	DNM1P35	hsa-miR-200a-3p	0.68975	0.436187	0.253563	2.27304e-92
PLEKHB1	DGCR5	hsa-miR-141-3p	0.719502	0.293776	0.425726	2.2947e-75
PLEKHB1	DGCR5	hsa-miR-200a-3p	0.719502	0.224529	0.494973	2.27304e-92
PLEKHB1	EGOT	hsa-miR-141-3p	0.725663	0.232129	0.493534	2.2947e-75
PLEKHB1	EGOT	hsa-miR-200a-3p	0.725663	0.176098	0.549565	2.27304e-92
PLEKHB1	PART1	hsa-miR-141-3p	0.84346	0.468292	0.375168	2.2947e-75
PLEKHB1	PART1	hsa-miR-200a-3p	0.84346	0.433137	0.410323	2.27304e-92
PLEKHB1	PVT1	hsa-miR-141-3p	0.867727	0.542336	0.325391	2.2947e-75
PLEKHB1	PVT1	hsa-miR-200a-3p	0.867727	0.471834	0.395893	2.27304e-92
PLEKHB1	SNHG10	hsa-miR-141-3p	0.692387	0.348901	0.343485	2.2947e-75
PLEKHB1	SNHG10	hsa-miR-200a-3p	0.692387	0.299575	0.392811	2.27304e-92
PLK2	EGOT	hsa-miR-200b-3p	0.692387	0.210405	0.481982	9.55305e-89
PLK2	EGOT	hsa-miR-200c-3p	0.692387	0.227832	0.464556	4.5866e-81
PLK2	PVT1	hsa-miR-200b-3p	0.71543	0.184688	0.530743	9.55305e-89
PLK2	PVT1	hsa-miR-200c-3p	0.71543	0.204689	0.510742	4.5866e-81
PLXNA2	H19	hsa-miR-200b-3p	0.685981	0.407084	0.278897	9.55305e-89
POGK	PVT1	hsa-miR-22-3p	0.719994	0.468416	0.251578	9.02349e-28
POGK	SNHG1	hsa-miR-22-3p	0.709002	0.424931	0.284071	9.02349e-28
PPM1H	EGOT	hsa-miR-205-5p	0.71039	0.442115	0.268275	4.24144e-50
PPP2R2B	PART1	hsa-miR-141-3p	0.702041	0.394236	0.307805	2.2947e-75
PPP2R2B	PART1	hsa-miR-200a-3p	0.702041	0.434719	0.267322	2.27304e-92
PPP2R2B	PVT1	hsa-miR-141-3p	0.713131	0.418982	0.294149	2.2947e-75
PPP2R2B	PVT1	hsa-miR-200a-3p	0.713131	0.461257	0.251873	2.27304e-92
PRMT6	EGOT	hsa-miR-205-5p	0.708134	0.323638	0.384497	4.24144e-50
PRMT6	PART1	hsa-miR-205-5p	0.777293	0.532304	0.244989	4.24144e-50
PRMT6	PVT1	hsa-miR-205-5p	0.766162	0.482799	0.283363	4.24144e-50
PRPF38A	DNM1P35	hsa-miR-22-3p	0.688705	0.336259	0.352446	9.02349e-28
PRPF38A	EGOT	hsa-miR-22-3p	0.719753	0.473528	0.246225	9.02349e-28
PRPF38A	GAS5	hsa-miR-22-3p	0.701075	0.295695	0.40538	9.02349e-28
PRPF38A	PART1	hsa-miR-22-3p	0.699231	0.3479	0.351331	9.02349e-28
PRPF38A	PVT1	hsa-miR-22-3p	0.752628	0.456298	0.29633	9.02349e-28
PRPF38A	SNHG1	hsa-miR-22-3p	0.724314	0.33862	0.385694	9.02349e-28
PRPF38A	SNHG4	hsa-miR-22-3p	0.687514	0.404823	0.282691	9.02349e-28
PRRG4	DGCR5	hsa-miR-200b-3p	0.773453	0.351066	0.422388	9.55305e-89
PRRG4	DGCR5	hsa-miR-200c-3p	0.773453	0.343825	0.429629	4.5866e-81
PRRG4	EGOT	hsa-miR-200b-3p	0.857344	0.464775	0.392569	9.55305e-89
PRRG4	EGOT	hsa-miR-200c-3p	0.857344	0.458568	0.398776	4.5866e-81
PRRG4	FAM66C	hsa-miR-200b-3p	0.73536	0.234909	0.500451	9.55305e-89
PRRG4	FAM66C	hsa-miR-200c-3p	0.73536	0.226422	0.508938	4.5866e-81
PRRG4	PART1	hsa-miR-200b-3p	0.873107	0.369892	0.503215	9.55305e-89
PRRG4	PART1	hsa-miR-200c-3p	0.873107	0.399087	0.47402	4.5866e-81
PRRG4	PVT1	hsa-miR-200b-3p	0.86606	0.335055	0.531005	9.55305e-89
PRRG4	PVT1	hsa-miR-200c-3p	0.86606	0.315855	0.550205	4.5866e-81
PTBP1	DGCR5	hsa-miR-200b-3p	0.709308	0.392765	0.316542	9.55305e-89
PTBP1	DGCR5	hsa-miR-200c-3p	0.709308	0.395202	0.314106	4.5866e-81
PTBP1	PART1	hsa-miR-200b-3p	0.702647	0.246816	0.455831	9.55305e-89
PTBP1	PART1	hsa-miR-200c-3p	0.702647	0.267688	0.434959	4.5866e-81
PTBP1	PART1	hsa-miR-429	0.702647	0.365878	0.336769	4.58741e-17
PTBP1	PVT1	hsa-miR-200b-3p	0.734265	0.342364	0.391901	9.55305e-89
PTBP1	PVT1	hsa-miR-200c-3p	0.734265	0.348512	0.385753	4.5866e-81
PTCHD1	FAM66C	hsa-miR-205-5p	0.745105	0.441056	0.304049	4.24144e-50
PTCHD1	GAS5	hsa-miR-205-5p	0.690614	0.419573	0.271041	4.24144e-50
PTCHD1	PART1	hsa-miR-205-5p	0.807442	0.560165	0.247277	4.24144e-50
PTCHD1	PVT1	hsa-miR-205-5p	0.777385	0.453344	0.324041	4.24144e-50
PTCHD1	SNHG1	hsa-miR-205-5p	0.695261	0.415606	0.279656	4.24144e-50
PTDSS1	PVT1	hsa-miR-200b-3p	0.711282	0.417202	0.29408	9.55305e-89
PTK7	EGOT	hsa-miR-205-5p	0.785235	0.375915	0.40932	4.24144e-50
PTPRT	PART1	hsa-miR-378a-3p	0.747646	0.494264	0.253382	0.028419
QKI	EMX2OS	hsa-miR-141-3p	0.736085	0.450778	0.285307	2.2947e-75
QKI	EMX2OS	hsa-miR-200a-3p	0.736085	0.433765	0.30232	2.27304e-92
QKI	EMX2OS	hsa-miR-200b-3p	0.736085	0.460797	0.275288	9.55305e-89
QKI	EMX2OS	hsa-miR-200c-3p	0.736085	0.482987	0.253098	4.5866e-81
RAB38	DGCR5	hsa-miR-141-3p	0.691523	0.30417	0.387353	2.2947e-75
RAB38	DGCR5	hsa-miR-200a-3p	0.691523	0.237988	0.453535	2.27304e-92
RAB38	EGOT	hsa-miR-141-3p	0.695559	0.25794	0.437619	2.2947e-75
RAB38	EGOT	hsa-miR-200a-3p	0.695559	0.199023	0.496536	2.27304e-92
RAB38	PART1	hsa-miR-141-3p	0.731564	0.248663	0.482902	2.2947e-75
RAB38	PART1	hsa-miR-200a-3p	0.731564	0.186232	0.545332	2.27304e-92
RAB38	PVT1	hsa-miR-141-3p	0.826717	0.519221	0.307495	2.2947e-75
RAB38	PVT1	hsa-miR-200a-3p	0.826717	0.447782	0.378935	2.27304e-92
RAB7A	EMX2OS	hsa-miR-200b-3p	0.730835	0.464237	0.266599	9.55305e-89
RALGPS1	EGOT	hsa-miR-141-3p	0.749338	0.384796	0.364542	2.2947e-75
RALGPS1	EGOT	hsa-miR-200a-3p	0.749338	0.363198	0.38614	2.27304e-92
RALGPS1	FAM66C	hsa-miR-141-3p	0.68747	0.340125	0.347345	2.2947e-75
RALGPS1	FAM66C	hsa-miR-200a-3p	0.68747	0.295411	0.392059	2.27304e-92
RALGPS1	HCG18	hsa-miR-200a-3p	0.760894	0.491545	0.269349	2.27304e-92
RALGPS1	PART1	hsa-miR-141-3p	0.708462	0.174141	0.534322	2.2947e-75
RALGPS1	PART1	hsa-miR-200a-3p	0.708462	0.154747	0.553716	2.27304e-92
RALGPS1	PVT1	hsa-miR-141-3p	0.736086	0.244255	0.491831	2.2947e-75
RALGPS1	PVT1	hsa-miR-200a-3p	0.736086	0.184029	0.552057	2.27304e-92
RALGPS1	SNHG10	hsa-miR-141-3p	0.730638	0.469828	0.26081	2.2947e-75
RALGPS1	SNHG10	hsa-miR-200a-3p	0.730638	0.443934	0.286705	2.27304e-92
RALGPS2	EGOT	hsa-miR-200b-3p	0.835828	0.559376	0.276452	9.55305e-89
RALGPS2	EGOT	hsa-miR-200c-3p	0.835828	0.573484	0.262344	4.5866e-81
RALGPS2	FAM66C	hsa-miR-141-3p	0.715816	0.428457	0.28736	2.2947e-75
RALGPS2	FAM66C	hsa-miR-200a-3p	0.715816	0.403173	0.312643	2.27304e-92
RALGPS2	FAM66C	hsa-miR-200b-3p	0.715816	0.343371	0.372446	9.55305e-89
RALGPS2	FAM66C	hsa-miR-200c-3p	0.715816	0.353381	0.362435	4.5866e-81
RALGPS2	HCG18	hsa-miR-200a-3p	0.722379	0.441042	0.281337	2.27304e-92
RALGPS2	HCG18	hsa-miR-200b-3p	0.722379	0.444845	0.277534	9.55305e-89
RALGPS2	HCG18	hsa-miR-200c-3p	0.722379	0.462949	0.259429	4.5866e-81
RALGPS2	PVT1	hsa-miR-141-3p	0.696432	0.207124	0.489308	2.2947e-75
RALGPS2	PVT1	hsa-miR-200a-3p	0.696432	0.175223	0.521209	2.27304e-92
RALGPS2	PVT1	hsa-miR-200b-3p	0.696432	0.0558411	0.640591	9.55305e-89
RALGPS2	PVT1	hsa-miR-200c-3p	0.696432	0.0787623	0.61767	4.5866e-81
RAPGEFL1	DGCR5	hsa-miR-22-3p	0.708039	0.46076	0.247278	9.02349e-28
RARB	EGOT	hsa-miR-141-3p	0.708873	0.329405	0.379468	2.2947e-75
RARB	EGOT	hsa-miR-200a-3p	0.708873	0.324468	0.384406	2.27304e-92
RARB	HCG18	hsa-miR-200a-3p	0.720231	0.435635	0.284596	2.27304e-92
RARB	PART1	hsa-miR-141-3p	0.720844	0.27637	0.444475	2.2947e-75
RARB	PART1	hsa-miR-200a-3p	0.720844	0.283288	0.437557	2.27304e-92
RARB	PVT1	hsa-miR-141-3p	0.713194	0.246593	0.4666	2.2947e-75
RARB	PVT1	hsa-miR-200a-3p	0.713194	0.222604	0.49059	2.27304e-92
RBBP8	DGCR5	hsa-miR-200b-3p	0.724735	0.252458	0.472277	9.55305e-89
RBBP8	DGCR5	hsa-miR-200c-3p	0.724735	0.244694	0.480042	4.5866e-81
RBBP8	EGOT	hsa-miR-200b-3p	0.826992	0.415341	0.411651	9.55305e-89
RBBP8	EGOT	hsa-miR-200c-3p	0.826992	0.408639	0.418353	4.5866e-81
RBBP8	FAM66C	hsa-miR-200b-3p	0.736659	0.298766	0.437893	9.55305e-89
RBBP8	FAM66C	hsa-miR-200c-3p	0.736659	0.291059	0.4456	4.5866e-81
RBBP8	HCG18	hsa-miR-200b-3p	0.692286	0.322896	0.369391	9.55305e-89
RBBP8	HCG18	hsa-miR-200c-3p	0.692286	0.342125	0.350162	4.5866e-81
RBBP8	PART1	hsa-miR-200b-3p	0.808932	0.213975	0.594958	9.55305e-89
RBBP8	PART1	hsa-miR-200c-3p	0.808932	0.236321	0.572611	4.5866e-81
RBBP8	PART1	hsa-miR-429	0.808932	0.483028	0.325904	4.58741e-17
RBBP8	PVT1	hsa-miR-200b-3p	0.815525	0.241654	0.573871	9.55305e-89
RBBP8	PVT1	hsa-miR-200c-3p	0.815525	0.221814	0.593711	4.5866e-81
RBM47	EGOT	hsa-miR-141-3p	0.757196	0.379989	0.377207	2.2947e-75
RBM47	EGOT	hsa-miR-200a-3p	0.757196	0.347418	0.409778	2.27304e-92
RBM47	EGOT	hsa-miR-205-5p	0.757196	0.380609	0.376587	4.24144e-50
RBM47	FAM66C	hsa-miR-141-3p	0.742021	0.444913	0.297108	2.2947e-75
RBM47	FAM66C	hsa-miR-200a-3p	0.742021	0.396657	0.345364	2.27304e-92
RBM47	FAM66C	hsa-miR-205-5p	0.742021	0.439974	0.302047	4.24144e-50
RBM47	HCG18	hsa-miR-141-3p	0.70559	0.419783	0.285807	2.2947e-75
RBM47	HCG18	hsa-miR-200a-3p	0.70559	0.347261	0.358329	2.27304e-92
RBM47	PART1	hsa-miR-141-3p	0.801823	0.411325	0.390499	2.2947e-75
RBM47	PART1	hsa-miR-200a-3p	0.801823	0.383625	0.418198	2.27304e-92
RBM47	PART1	hsa-miR-205-5p	0.801823	0.552318	0.249506	4.24144e-50
RBM47	PVT1	hsa-miR-141-3p	0.794187	0.379472	0.414715	2.2947e-75
RBM47	PVT1	hsa-miR-200a-3p	0.794187	0.312202	0.481985	2.27304e-92
RBM47	PVT1	hsa-miR-205-5p	0.794187	0.501929	0.292258	4.24144e-50
RCC2	GAS5	hsa-miR-22-3p	0.725075	0.47964	0.245435	9.02349e-28
RCC2	PART1	hsa-miR-378a-3p	0.776253	0.515602	0.260651	0.028419
RGL2	DGCR5	hsa-miR-196a-5p	0.697558	0.425548	0.272009	0.485358
RHOBTB1	H19	hsa-miR-141-3p	0.722231	0.47337	0.248861	2.2947e-75
RHOBTB1	H19	hsa-miR-200a-3p	0.722231	0.452312	0.26992	2.27304e-92
RHPN2	DGCR5	hsa-miR-141-3p	0.753005	0.322912	0.430093	2.2947e-75
RHPN2	DGCR5	hsa-miR-200a-3p	0.753005	0.245166	0.507839	2.27304e-92
RHPN2	EGOT	hsa-miR-141-3p	0.845495	0.546889	0.298606	2.2947e-75
RHPN2	EGOT	hsa-miR-200a-3p	0.845495	0.519021	0.326474	2.27304e-92
RHPN2	FAM66C	hsa-miR-141-3p	0.769953	0.474986	0.294968	2.2947e-75
RHPN2	FAM66C	hsa-miR-200a-3p	0.769953	0.399786	0.370168	2.27304e-92
RHPN2	GAS5	hsa-miR-141-3p	0.692134	0.358976	0.333158	2.2947e-75
RHPN2	GAS5	hsa-miR-200a-3p	0.692134	0.255823	0.436311	2.27304e-92
RHPN2	HCG18	hsa-miR-141-3p	0.699971	0.36044	0.339531	2.2947e-75
RHPN2	HCG18	hsa-miR-200a-3p	0.699971	0.227224	0.472747	2.27304e-92
RHPN2	PART1	hsa-miR-141-3p	0.908481	0.635675	0.272806	2.2947e-75
RHPN2	PART1	hsa-miR-200a-3p	0.908481	0.625397	0.283084	2.27304e-92
RHPN2	PVT1	hsa-miR-141-3p	0.917582	0.661879	0.255703	2.2947e-75
RHPN2	PVT1	hsa-miR-200a-3p	0.917582	0.59397	0.323612	2.27304e-92
RHPN2	SNHG10	hsa-miR-141-3p	0.685839	0.289874	0.395966	2.2947e-75
RHPN2	SNHG10	hsa-miR-200a-3p	0.685839	0.226446	0.459393	2.27304e-92
RIMS3	EGOT	hsa-miR-200b-3p	0.766925	0.33946	0.427464	9.55305e-89
RIMS3	EGOT	hsa-miR-200c-3p	0.766925	0.330974	0.435951	4.5866e-81
RIMS3	FAM66C	hsa-miR-200b-3p	0.72584	0.347348	0.378492	9.55305e-89
RIMS3	FAM66C	hsa-miR-200c-3p	0.72584	0.340031	0.385809	4.5866e-81
RIMS3	PART1	hsa-miR-200b-3p	0.717376	0.073731	0.643645	9.55305e-89
RIMS3	PART1	hsa-miR-200c-3p	0.717376	0.0892536	0.628122	4.5866e-81
RIMS3	PART1	hsa-miR-429	0.717376	0.364633	0.352743	4.58741e-17
RIMS3	PVT1	hsa-miR-200b-3p	0.698057	0.00673172	0.691325	9.55305e-89
RIMS3	PVT1	hsa-miR-200c-3p	0.698057	-0.0193578	0.717414	4.5866e-81
RNF157	EMX2OS	hsa-miR-452-5p	0.728976	0.453759	0.275217	0.000628283
RNF157	MESTIT1	hsa-miR-452-5p	0.707424	0.446147	0.261277	0.000628283
RNF207	PVT1	hsa-miR-205-5p	0.720792	0.454956	0.265837	4.24144e-50
RNF44	DGCR5	hsa-miR-141-3p	0.730158	0.398039	0.33212	2.2947e-75
RNF44	DGCR5	hsa-miR-200a-3p	0.730158	0.379617	0.350541	2.27304e-92
RNF44	PART1	hsa-miR-141-3p	0.730392	0.258625	0.471767	2.2947e-75
RNF44	PART1	hsa-miR-200a-3p	0.730392	0.267517	0.462875	2.27304e-92
RNF44	PVT1	hsa-miR-141-3p	0.766573	0.354365	0.412209	2.2947e-75
RNF44	PVT1	hsa-miR-200a-3p	0.766573	0.337635	0.428939	2.27304e-92
RPS3	GAS5	hsa-miR-22-3p	0.74362	0.494324	0.249296	9.02349e-28
RUNX1	DGCR5	hsa-miR-141-3p	0.701361	0.261537	0.439824	2.2947e-75
RUNX1	DGCR5	hsa-miR-200a-3p	0.701361	0.211065	0.490296	2.27304e-92
RUNX1	DGCR5	hsa-miR-205-5p	0.701361	0.381611	0.319751	4.24144e-50
RUNX1	EGOT	hsa-miR-141-3p	0.822535	0.519995	0.30254	2.2947e-75
RUNX1	EGOT	hsa-miR-200a-3p	0.822535	0.499513	0.323023	2.27304e-92
RUNX1	EGOT	hsa-miR-205-5p	0.822535	0.533346	0.289189	4.24144e-50
RUNX1	FAM66C	hsa-miR-141-3p	0.730108	0.395704	0.334404	2.2947e-75
RUNX1	FAM66C	hsa-miR-200a-3p	0.730108	0.343545	0.386564	2.27304e-92
RUNX1	FAM66C	hsa-miR-205-5p	0.730108	0.401879	0.328229	4.24144e-50
RUNX1	HCG18	hsa-miR-141-3p	0.687425	0.362111	0.325314	2.2947e-75
RUNX1	HCG18	hsa-miR-200a-3p	0.687425	0.279955	0.40747	2.27304e-92
RUNX1	HCG18	hsa-miR-22-3p	0.687425	0.415558	0.271867	9.02349e-28
RUNX1	PART1	hsa-miR-141-3p	0.800388	0.347102	0.453286	2.2947e-75
RUNX1	PART1	hsa-miR-200a-3p	0.800388	0.329513	0.470875	2.27304e-92
RUNX1	PART1	hsa-miR-205-5p	0.800388	0.539093	0.261295	4.24144e-50
RUNX1	PVT1	hsa-miR-141-3p	0.863638	0.54727	0.316368	2.2947e-75
RUNX1	PVT1	hsa-miR-200a-3p	0.863638	0.505827	0.35781	2.27304e-92
RUNX1	SNHG10	hsa-miR-141-3p	0.692948	0.358227	0.334721	2.2947e-75
RUNX1	SNHG10	hsa-miR-200a-3p	0.692948	0.321303	0.371645	2.27304e-92
RUNX2	EGOT	hsa-miR-205-5p	0.742411	0.317457	0.424954	4.24144e-50
RUNX2	FAM66C	hsa-miR-205-5p	0.776508	0.504709	0.271799	4.24144e-50
RUNX2	PART1	hsa-miR-205-5p	0.743234	0.404185	0.339049	4.24144e-50
RUNX2	PVT1	hsa-miR-205-5p	0.822719	0.556714	0.266005	4.24144e-50
SAR1A	EMX2OS	hsa-miR-200a-3p	0.793758	0.531035	0.262722	2.27304e-92
SCD5	EGOT	hsa-miR-141-3p	0.739384	0.467694	0.27169	2.2947e-75
SCD5	EGOT	hsa-miR-200a-3p	0.739384	0.445264	0.29412	2.27304e-92
SCD5	EGOT	hsa-miR-205-5p	0.739384	0.445793	0.293591	4.24144e-50
SCD5	PART1	hsa-miR-141-3p	0.686942	0.299091	0.387851	2.2947e-75
SCD5	PART1	hsa-miR-200a-3p	0.686942	0.270815	0.416127	2.27304e-92
SCD5	PART1	hsa-miR-205-5p	0.686942	0.378642	0.3083	4.24144e-50
SCD5	PVT1	hsa-miR-141-3p	0.715422	0.366638	0.348784	2.2947e-75
SCD5	PVT1	hsa-miR-200a-3p	0.715422	0.32108	0.394342	2.27304e-92
SCD5	PVT1	hsa-miR-205-5p	0.715422	0.410447	0.304975	4.24144e-50
SCN2A	DGCR5	hsa-miR-200b-3p	0.693308	0.26938	0.423928	9.55305e-89
SCN2A	DGCR5	hsa-miR-200c-3p	0.693308	0.265375	0.427933	4.5866e-81
SCN2A	EGOT	hsa-miR-200b-3p	0.753038	0.311934	0.441104	9.55305e-89
SCN2A	EGOT	hsa-miR-200c-3p	0.753038	0.308472	0.444566	4.5866e-81
SCN2A	FAM66C	hsa-miR-200b-3p	0.718938	0.33846	0.380479	9.55305e-89
SCN2A	FAM66C	hsa-miR-200c-3p	0.718938	0.334491	0.384447	4.5866e-81
SCN2A	HCG18	hsa-miR-200b-3p	0.725035	0.444296	0.280739	9.55305e-89
SCN2A	HCG18	hsa-miR-200c-3p	0.725035	0.456799	0.268237	4.5866e-81
SCN2A	PART1	hsa-miR-200b-3p	0.717364	0.0941523	0.623212	9.55305e-89
SCN2A	PART1	hsa-miR-200c-3p	0.717364	0.116481	0.600883	4.5866e-81
SCN2A	PART1	hsa-miR-429	0.717364	0.384086	0.333278	4.58741e-17
SCN2A	PVT1	hsa-miR-200b-3p	0.731862	0.144174	0.587688	9.55305e-89
SCN2A	PVT1	hsa-miR-200c-3p	0.731862	0.131551	0.600311	4.5866e-81
SCN8A	DNM1P35	hsa-miR-200b-3p	0.709274	0.413978	0.295296	9.55305e-89
SCN8A	DNM1P35	hsa-miR-200c-3p	0.709274	0.436732	0.272542	4.5866e-81
SCN8A	EGOT	hsa-miR-200b-3p	0.737737	0.26242	0.475317	9.55305e-89
SCN8A	EGOT	hsa-miR-200c-3p	0.737737	0.298229	0.439508	4.5866e-81
SCN8A	FAM66C	hsa-miR-200b-3p	0.724073	0.346871	0.377202	9.55305e-89
SCN8A	FAM66C	hsa-miR-200c-3p	0.724073	0.366604	0.357469	4.5866e-81
SCN8A	PVT1	hsa-miR-200b-3p	0.769516	0.264532	0.504983	9.55305e-89
SCN8A	PVT1	hsa-miR-200c-3p	0.769516	0.311513	0.458003	4.5866e-81
SCYL3	SNHG1	hsa-miR-22-3p	0.693973	0.381834	0.312138	9.02349e-28
SDC2	EMX2OS	hsa-miR-141-3p	0.75979	0.500505	0.259286	2.2947e-75
SDC2	EMX2OS	hsa-miR-200a-3p	0.75979	0.463371	0.296419	2.27304e-92
SDC2	EMX2OS	hsa-miR-200b-3p	0.75979	0.496148	0.263642	9.55305e-89
SDC2	EMX2OS	hsa-miR-452-5p	0.75979	0.505834	0.253956	0.000628283
SDK2	DGCR5	hsa-miR-200b-3p	0.770145	0.326602	0.443542	9.55305e-89
SDK2	DGCR5	hsa-miR-200c-3p	0.770145	0.311837	0.458308	4.5866e-81
SDK2	EGOT	hsa-miR-200b-3p	0.83736	0.361498	0.475862	9.55305e-89
SDK2	EGOT	hsa-miR-200c-3p	0.83736	0.342636	0.494724	4.5866e-81
SDK2	FAM66C	hsa-miR-200b-3p	0.700463	0.0855188	0.614944	9.55305e-89
SDK2	FAM66C	hsa-miR-200c-3p	0.700463	0.0591368	0.641326	4.5866e-81
SDK2	FAM66C	hsa-miR-429	0.700463	0.447346	0.253116	4.58741e-17
SDK2	PART1	hsa-miR-200b-3p	0.837849	0.142807	0.695042	9.55305e-89
SDK2	PART1	hsa-miR-200c-3p	0.837849	0.160869	0.67698	4.5866e-81
SDK2	PART1	hsa-miR-429	0.837849	0.510839	0.327011	4.58741e-17
SDK2	PVT1	hsa-miR-200b-3p	0.873311	0.333574	0.539737	9.55305e-89
SDK2	PVT1	hsa-miR-200c-3p	0.873311	0.290485	0.582826	4.5866e-81
SEC11A	EMX2OS	hsa-miR-141-3p	0.691224	0.411094	0.280131	2.2947e-75
SEC11A	EMX2OS	hsa-miR-200a-3p	0.691224	0.39573	0.295494	2.27304e-92
SEC23A	H19	hsa-miR-200b-3p	0.688207	0.363682	0.324526	9.55305e-89
SEC23A	H19	hsa-miR-200c-3p	0.688207	0.398129	0.290078	4.5866e-81
SEC23B	HCG18	hsa-miR-22-3p	0.698396	0.425927	0.272469	9.02349e-28
SH3KBP1	H19	hsa-miR-22-3p	0.704857	0.248515	0.456341	9.02349e-28
SH3KBP1	SFTA1P	hsa-miR-22-3p	0.703886	0.353856	0.35003	9.02349e-28
SHROOM2	DGCR5	hsa-miR-200b-3p	0.783044	0.373223	0.409821	9.55305e-89
SHROOM2	DGCR5	hsa-miR-200c-3p	0.783044	0.36603	0.417013	4.5866e-81
SHROOM2	EGOT	hsa-miR-200b-3p	0.828646	0.318537	0.510109	9.55305e-89
SHROOM2	EGOT	hsa-miR-200c-3p	0.828646	0.312577	0.516069	4.5866e-81
SHROOM2	PART1	hsa-miR-200b-3p	0.842043	0.155567	0.686476	9.55305e-89
SHROOM2	PART1	hsa-miR-200c-3p	0.842043	0.201924	0.640119	4.5866e-81
SHROOM2	PART1	hsa-miR-429	0.842043	0.515349	0.326694	4.58741e-17
SHROOM2	PVT1	hsa-miR-200b-3p	0.863907	0.275102	0.588805	9.55305e-89
SHROOM2	PVT1	hsa-miR-200c-3p	0.863907	0.255532	0.608375	4.5866e-81
SHROOM3	DGCR5	hsa-miR-205-5p	0.744433	0.425971	0.318461	4.24144e-50
SHROOM3	EGOT	hsa-miR-205-5p	0.85656	0.53031	0.326249	4.24144e-50
SHROOM3	FAM66C	hsa-miR-205-5p	0.743721	0.351553	0.392168	4.24144e-50
SIK2	EMX2OS	hsa-miR-200b-3p	0.731316	0.446024	0.285292	9.55305e-89
SIK2	EMX2OS	hsa-miR-200c-3p	0.731316	0.477266	0.254049	4.5866e-81
SIPA1L1	EGOT	hsa-miR-205-5p	0.743796	0.424311	0.319485	4.24144e-50
SIPA1L1	FAM66C	hsa-miR-205-5p	0.687117	0.373624	0.313493	4.24144e-50
SIPA1L1	PART1	hsa-miR-205-5p	0.696966	0.374528	0.322438	4.24144e-50
SIPA1L1	PVT1	hsa-miR-205-5p	0.719627	0.391183	0.328444	4.24144e-50
SLC16A13	PART1	hsa-miR-205-5p	0.752768	0.506965	0.245803	4.24144e-50
SLC1A2	EGOT	hsa-miR-200b-3p	0.722255	0.239294	0.482961	9.55305e-89
SLC1A2	EGOT	hsa-miR-200c-3p	0.722255	0.24559	0.476665	4.5866e-81
SLC1A2	PART1	hsa-miR-200b-3p	0.686064	0.00969175	0.676372	9.55305e-89
SLC1A2	PART1	hsa-miR-200c-3p	0.686064	0.0497178	0.636346	4.5866e-81
SLC1A2	PART1	hsa-miR-429	0.686064	0.309984	0.37608	4.58741e-17
SLC1A2	PVT1	hsa-miR-200b-3p	0.748572	0.221394	0.527178	9.55305e-89
SLC1A2	PVT1	hsa-miR-200c-3p	0.748572	0.225641	0.522931	4.5866e-81
SLC2A12	PVT1	hsa-miR-22-3p	0.705275	0.457984	0.247291	9.02349e-28
SLC4A7	EGOT	hsa-miR-200b-3p	0.785811	0.455908	0.329903	9.55305e-89
SLC4A7	EGOT	hsa-miR-200c-3p	0.785811	0.468429	0.317382	4.5866e-81
SLC4A7	FAM66C	hsa-miR-200b-3p	0.710412	0.356295	0.354117	9.55305e-89
SLC4A7	FAM66C	hsa-miR-200c-3p	0.710412	0.36376	0.346651	4.5866e-81
SLC4A7	HCG18	hsa-miR-200b-3p	0.691207	0.395744	0.295463	9.55305e-89
SLC4A7	HCG18	hsa-miR-200c-3p	0.691207	0.413128	0.278078	4.5866e-81
SLC4A7	PVT1	hsa-miR-200b-3p	0.688614	0.0960832	0.592531	9.55305e-89
SLC4A7	PVT1	hsa-miR-200c-3p	0.688614	0.111911	0.576703	4.5866e-81
SNX21	EMX2OS	hsa-miR-22-3p	0.705355	0.37516	0.330196	9.02349e-28
SNX21	H19	hsa-miR-22-3p	0.745379	0.382428	0.362952	9.02349e-28
SORBS2	PART1	hsa-miR-141-3p	0.763846	0.435881	0.327965	2.2947e-75
SORBS2	PART1	hsa-miR-200a-3p	0.763846	0.454262	0.309583	2.27304e-92
SORBS2	PVT1	hsa-miR-141-3p	0.74518	0.381465	0.363715	2.2947e-75
SORBS2	PVT1	hsa-miR-200a-3p	0.74518	0.387165	0.358015	2.27304e-92
SORT1	EMX2OS	hsa-miR-200b-3p	0.691903	0.327744	0.364159	9.55305e-89
SORT1	EMX2OS	hsa-miR-200c-3p	0.691903	0.359223	0.33268	4.5866e-81
SP6	EGOT	hsa-miR-205-5p	0.739478	0.331322	0.408156	4.24144e-50
SPATS2	DGCR5	hsa-miR-141-3p	0.710503	0.300524	0.409979	2.2947e-75
SPATS2	DGCR5	hsa-miR-200a-3p	0.710503	0.255554	0.454949	2.27304e-92
SPATS2	EGOT	hsa-miR-141-3p	0.716852	0.248497	0.468355	2.2947e-75
SPATS2	EGOT	hsa-miR-200a-3p	0.716852	0.219259	0.497592	2.27304e-92
SPATS2	HCG18	hsa-miR-200a-3p	0.772697	0.498256	0.274441	2.27304e-92
SPATS2	PART1	hsa-miR-141-3p	0.768665	0.271787	0.496877	2.2947e-75
SPATS2	PART1	hsa-miR-200a-3p	0.768665	0.253896	0.514769	2.27304e-92
SPATS2	PVT1	hsa-miR-141-3p	0.82729	0.449319	0.377971	2.2947e-75
SPATS2	PVT1	hsa-miR-200a-3p	0.82729	0.401967	0.425323	2.27304e-92
SPOCK1	EMX2OS	hsa-miR-22-3p	0.715522	0.459499	0.256023	9.02349e-28
SS18	FAM66C	hsa-miR-205-5p	0.720946	0.453609	0.267337	4.24144e-50
ST3GAL3	H19	hsa-miR-200a-3p	0.732678	0.472439	0.260239	2.27304e-92
ST6GALNAC5	DGCR5	hsa-miR-200b-3p	0.688111	0.132254	0.555857	9.55305e-89
ST6GALNAC5	DGCR5	hsa-miR-200c-3p	0.688111	0.109047	0.579064	4.5866e-81
ST6GALNAC5	EGOT	hsa-miR-200b-3p	0.803007	0.318956	0.484052	9.55305e-89
ST6GALNAC5	EGOT	hsa-miR-200c-3p	0.803007	0.296713	0.506294	4.5866e-81
ST6GALNAC5	FAM66C	hsa-miR-200b-3p	0.688841	0.148252	0.540589	9.55305e-89
ST6GALNAC5	FAM66C	hsa-miR-200c-3p	0.688841	0.125481	0.56336	4.5866e-81
ST6GALNAC5	PART1	hsa-miR-200b-3p	0.825374	0.259021	0.566353	9.55305e-89
ST6GALNAC5	PART1	hsa-miR-200c-3p	0.825374	0.260833	0.564541	4.5866e-81
ST6GALNAC5	PVT1	hsa-miR-200b-3p	0.81902	0.232201	0.586819	9.55305e-89
ST6GALNAC5	PVT1	hsa-miR-200c-3p	0.81902	0.186714	0.632306	4.5866e-81
STRBP	EGOT	hsa-miR-205-5p	0.710641	0.37597	0.334672	4.24144e-50
STRBP	PVT1	hsa-miR-205-5p	0.757346	0.497652	0.259693	4.24144e-50
STX7	EMX2OS	hsa-miR-141-3p	0.750765	0.487615	0.26315	2.2947e-75
STX7	EMX2OS	hsa-miR-200a-3p	0.750765	0.445181	0.305585	2.27304e-92
STXBP1	EMX2OS	hsa-miR-200a-3p	0.713292	0.45843	0.254861	2.27304e-92
STXBP6	EMX2OS	hsa-miR-200b-3p	0.727492	0.476214	0.251278	9.55305e-89
SVIP	PART1	hsa-miR-205-5p	0.712159	0.465057	0.247102	4.24144e-50
SVIP	PVT1	hsa-miR-205-5p	0.723265	0.470114	0.25315	4.24144e-50
TBC1D22B	EGOT	hsa-miR-200b-3p	0.690667	0.163323	0.527344	9.55305e-89
TBC1D22B	EGOT	hsa-miR-200c-3p	0.690667	0.209015	0.481652	4.5866e-81
TBC1D22B	PART1	hsa-miR-200b-3p	0.719024	0.137477	0.581547	9.55305e-89
TBC1D22B	PART1	hsa-miR-200c-3p	0.719024	0.220129	0.498895	4.5866e-81
TBC1D22B	PART1	hsa-miR-429	0.719024	0.294653	0.424371	4.58741e-17
TBC1D22B	PVT1	hsa-miR-200b-3p	0.796304	0.396179	0.400125	9.55305e-89
TBC1D22B	PVT1	hsa-miR-200c-3p	0.796304	0.44934	0.346964	4.5866e-81
TBX3	EGOT	hsa-miR-205-5p	0.765295	0.500606	0.264689	4.24144e-50
TET3	FAM66C	hsa-miR-141-3p	0.685652	0.378405	0.307248	2.2947e-75
TET3	FAM66C	hsa-miR-200a-3p	0.685652	0.343724	0.341929	2.27304e-92
TET3	PVT1	hsa-miR-141-3p	0.733128	0.334528	0.398601	2.2947e-75
TET3	PVT1	hsa-miR-200a-3p	0.733128	0.295193	0.437936	2.27304e-92
TFAP2A	DGCR5	hsa-miR-141-3p	0.749477	0.318679	0.430798	2.2947e-75
TFAP2A	DGCR5	hsa-miR-200a-3p	0.749477	0.262734	0.486744	2.27304e-92
TFAP2A	DGCR5	hsa-miR-200b-3p	0.749477	0.202351	0.547126	9.55305e-89
TFAP2A	DGCR5	hsa-miR-200c-3p	0.749477	0.177277	0.5722	4.5866e-81
TFAP2A	EGOT	hsa-miR-141-3p	0.862045	0.606863	0.255181	2.2947e-75
TFAP2A	EGOT	hsa-miR-200a-3p	0.862045	0.58515	0.276895	2.27304e-92
TFAP2A	EGOT	hsa-miR-200b-3p	0.862045	0.446443	0.415601	9.55305e-89
TFAP2A	EGOT	hsa-miR-200c-3p	0.862045	0.433644	0.428401	4.5866e-81
TFAP2A	FAM66C	hsa-miR-141-3p	0.748314	0.406967	0.341347	2.2947e-75
TFAP2A	FAM66C	hsa-miR-200a-3p	0.748314	0.338383	0.409931	2.27304e-92
TFAP2A	FAM66C	hsa-miR-200b-3p	0.748314	0.221226	0.527088	9.55305e-89
TFAP2A	FAM66C	hsa-miR-200c-3p	0.748314	0.197294	0.55102	4.5866e-81
TFAP2A	PART1	hsa-miR-141-3p	0.895452	0.585692	0.309761	2.2947e-75
TFAP2A	PART1	hsa-miR-200a-3p	0.895452	0.582246	0.313207	2.27304e-92
TFAP2A	PART1	hsa-miR-200b-3p	0.895452	0.378918	0.516535	9.55305e-89
TFAP2A	PART1	hsa-miR-200c-3p	0.895452	0.414277	0.481175	4.5866e-81
TFAP2A	PVT1	hsa-miR-141-3p	0.888478	0.541718	0.34676	2.2947e-75
TFAP2A	PVT1	hsa-miR-200a-3p	0.888478	0.484656	0.403822	2.27304e-92
TFAP2A	PVT1	hsa-miR-200b-3p	0.888478	0.332421	0.556058	9.55305e-89
TFAP2A	PVT1	hsa-miR-200c-3p	0.888478	0.27623	0.612249	4.5866e-81
TFAP2A	SNHG10	hsa-miR-141-3p	0.686166	0.295843	0.390322	2.2947e-75
TFAP2A	SNHG10	hsa-miR-200a-3p	0.686166	0.248247	0.437919	2.27304e-92
TFAP2A	SNHG10	hsa-miR-200b-3p	0.686166	0.194679	0.491487	9.55305e-89
TFAP2A	SNHG10	hsa-miR-200c-3p	0.686166	0.118923	0.567243	4.5866e-81
TFAP2C	DGCR5	hsa-miR-141-3p	0.756699	0.345531	0.411168	2.2947e-75
TFAP2C	DGCR5	hsa-miR-200a-3p	0.756699	0.282995	0.473704	2.27304e-92
TFAP2C	EGOT	hsa-miR-141-3p	0.825457	0.479431	0.346027	2.2947e-75
TFAP2C	EGOT	hsa-miR-200a-3p	0.825457	0.451005	0.374452	2.27304e-92
TFAP2C	FAM66C	hsa-miR-141-3p	0.753646	0.424405	0.329241	2.2947e-75
TFAP2C	FAM66C	hsa-miR-200a-3p	0.753646	0.353189	0.400457	2.27304e-92
TFAP2C	GAS5	hsa-miR-141-3p	0.708786	0.409039	0.299747	2.2947e-75
TFAP2C	GAS5	hsa-miR-200a-3p	0.708786	0.321811	0.386975	2.27304e-92
TFAP2C	HCG18	hsa-miR-141-3p	0.68469	0.318828	0.365862	2.2947e-75
TFAP2C	HCG18	hsa-miR-200a-3p	0.68469	0.198245	0.486445	2.27304e-92
TFAP2C	PART1	hsa-miR-141-3p	0.9148	0.668833	0.245967	2.2947e-75
TFAP2C	PART1	hsa-miR-200a-3p	0.9148	0.661775	0.253025	2.27304e-92
TFAP2C	PVT1	hsa-miR-141-3p	0.913481	0.651426	0.262055	2.2947e-75
TFAP2C	PVT1	hsa-miR-200a-3p	0.913481	0.596479	0.317002	2.27304e-92
TFAP2C	SNHG8	hsa-miR-141-3p	0.685046	0.256406	0.42864	2.2947e-75
TFAP2C	SNHG8	hsa-miR-200a-3p	0.685046	0.217347	0.467699	2.27304e-92
TGFA	DGCR5	hsa-miR-205-5p	0.714687	0.429112	0.285574	4.24144e-50
TGFA	FAM66C	hsa-miR-205-5p	0.703411	0.368561	0.334849	4.24144e-50
THPO	EMX2OS	hsa-miR-22-3p	0.686055	0.313193	0.372862	9.02349e-28
THPO	H19	hsa-miR-22-3p	0.748325	0.360073	0.388252	9.02349e-28
TIGD2	PART1	hsa-miR-200b-3p	0.756899	0.335399	0.4215	9.55305e-89
TIGD2	PART1	hsa-miR-200c-3p	0.756899	0.38329	0.373608	4.5866e-81
TIGD2	PART1	hsa-miR-429	0.756899	0.461009	0.29589	4.58741e-17
TIGD2	PVT1	hsa-miR-200b-3p	0.772164	0.383993	0.388171	9.55305e-89
TIGD2	PVT1	hsa-miR-200c-3p	0.772164	0.420845	0.351319	4.5866e-81
TIGD2	SNHG10	hsa-miR-200b-3p	0.711426	0.429368	0.282057	9.55305e-89
TIGD2	SNHG10	hsa-miR-200c-3p	0.711426	0.427934	0.283492	4.5866e-81
TIMP3	MESTIT1	hsa-miR-452-5p	0.720054	0.423306	0.296748	0.000628283
TLN2	EMX2OS	hsa-miR-141-3p	0.708467	0.431011	0.277456	2.2947e-75
TLN2	EMX2OS	hsa-miR-200a-3p	0.708467	0.385122	0.323345	2.27304e-92
TLN2	EMX2OS	hsa-miR-200b-3p	0.708467	0.410919	0.297548	9.55305e-89
TLN2	EMX2OS	hsa-miR-200c-3p	0.708467	0.436298	0.272169	4.5866e-81
TMEM130	PVT1	hsa-miR-141-3p	0.692366	0.236736	0.45563	2.2947e-75
TMEM130	PVT1	hsa-miR-200a-3p	0.692366	0.222613	0.469752	2.27304e-92
TMEM144	EGOT	hsa-miR-205-5p	0.736902	0.422055	0.314847	4.24144e-50
TMEM144	FAM66C	hsa-miR-205-5p	0.710714	0.429834	0.280879	4.24144e-50
TMEM170B	EMX2OS	hsa-miR-141-3p	0.728141	0.431151	0.29699	2.2947e-75
TMEM170B	EMX2OS	hsa-miR-200a-3p	0.728141	0.387865	0.340277	2.27304e-92
TMEM170B	EMX2OS	hsa-miR-200b-3p	0.728141	0.432487	0.295654	9.55305e-89
TMEM170B	EMX2OS	hsa-miR-200c-3p	0.728141	0.469953	0.258188	4.5866e-81
TMEM216	PART1	hsa-miR-141-3p	0.71568	0.451027	0.264653	2.2947e-75
TMEM216	PART1	hsa-miR-200a-3p	0.71568	0.459154	0.256526	2.27304e-92
TMEM229B	PART1	hsa-miR-200b-3p	0.767747	0.218655	0.549093	9.55305e-89
TMEM229B	PART1	hsa-miR-200c-3p	0.767747	0.232785	0.534963	4.5866e-81
TMEM229B	PART1	hsa-miR-429	0.767747	0.376998	0.39075	4.58741e-17
TMEM229B	PVT1	hsa-miR-200b-3p	0.788598	0.293291	0.495307	9.55305e-89
TMEM229B	PVT1	hsa-miR-200c-3p	0.788598	0.278015	0.510583	4.5866e-81
TMEM229B	TMEM191A	hsa-miR-200b-3p	0.743773	0.496311	0.247462	9.55305e-89
TMEM71	PART1	hsa-miR-181c-5p	0.713152	0.46576	0.247392	0.537002
TNIK	EGOT	hsa-miR-141-3p	0.687249	0.345809	0.34144	2.2947e-75
TNIK	EGOT	hsa-miR-200a-3p	0.687249	0.343994	0.343255	2.27304e-92
TP53	SNHG1	hsa-miR-22-3p	0.708208	0.408949	0.299259	9.02349e-28
TP53	SNHG8	hsa-miR-22-3p	0.749446	0.489066	0.26038	9.02349e-28
TP73	DGCR5	hsa-miR-200b-3p	0.768697	0.429835	0.338862	9.55305e-89
TP73	DGCR5	hsa-miR-200c-3p	0.768697	0.402869	0.365828	4.5866e-81
TP73	EGOT	hsa-miR-200b-3p	0.796683	0.401768	0.394915	9.55305e-89
TP73	EGOT	hsa-miR-200c-3p	0.796683	0.35833	0.438353	4.5866e-81
TP73	PART1	hsa-miR-200b-3p	0.713494	0.0140754	0.699419	9.55305e-89
TP73	PART1	hsa-miR-200c-3p	0.713494	-0.0355444	0.749038	4.5866e-81
TP73	PART1	hsa-miR-429	0.713494	0.308564	0.404931	4.58741e-17
TP73	PVT1	hsa-miR-200b-3p	0.744873	0.12725	0.617622	9.55305e-89
TP73	PVT1	hsa-miR-200c-3p	0.744873	0.0334278	0.711445	4.5866e-81
TRIM2	FAM66C	hsa-miR-200b-3p	0.757956	0.464037	0.293919	9.55305e-89
TRIM2	FAM66C	hsa-miR-200c-3p	0.757956	0.477585	0.280371	4.5866e-81
TRIM2	GAS5	hsa-miR-200b-3p	0.710417	0.445099	0.265318	9.55305e-89
TRIM2	GAS5	hsa-miR-200c-3p	0.710417	0.457176	0.253241	4.5866e-81
TRIM2	PART1	hsa-miR-200b-3p	0.724913	0.218667	0.506246	9.55305e-89
TRIM2	PART1	hsa-miR-200c-3p	0.724913	0.274725	0.450188	4.5866e-81
TRIM2	PART1	hsa-miR-429	0.724913	0.444191	0.280722	4.58741e-17
TRIM2	PVT1	hsa-miR-200b-3p	0.695685	0.125066	0.570619	9.55305e-89
TRIM2	PVT1	hsa-miR-200c-3p	0.695685	0.162768	0.532917	4.5866e-81
TRPS1	DGCR5	hsa-miR-205-5p	0.724344	0.404052	0.320291	4.24144e-50
TRPS1	EGOT	hsa-miR-205-5p	0.84884	0.560627	0.288213	4.24144e-50
TRPS1	FAM66C	hsa-miR-205-5p	0.791429	0.516052	0.275377	4.24144e-50
TRPS1	SNHG1	hsa-miR-205-5p	0.730653	0.469263	0.26139	4.24144e-50
TTC19	EGOT	hsa-miR-205-5p	0.699281	0.34854	0.350741	4.24144e-50
TYRO3	EMX2OS	hsa-miR-22-3p	0.749037	0.476682	0.272354	9.02349e-28
TYRO3	SFTA1P	hsa-miR-22-3p	0.706165	0.387978	0.318187	9.02349e-28
UBE2Z	DGCR5	hsa-miR-141-3p	0.698616	0.425764	0.272851	2.2947e-75
UBE2Z	DGCR5	hsa-miR-200a-3p	0.698616	0.384845	0.313771	2.27304e-92
UBE2Z	PVT1	hsa-miR-141-3p	0.706172	0.371042	0.33513	2.2947e-75
UBE2Z	PVT1	hsa-miR-200a-3p	0.706172	0.305421	0.40075	2.27304e-92
UMPS	PART1	hsa-miR-378a-3p	0.699242	0.369486	0.329756	0.028419
UNK	DGCR5	hsa-miR-22-3p	0.721186	0.443162	0.278024	9.02349e-28
UNK	DNM1P35	hsa-miR-22-3p	0.733953	0.473665	0.260288	9.02349e-28
UNK	EGOT	hsa-miR-22-3p	0.693967	0.438146	0.25582	9.02349e-28
UNK	HCG18	hsa-miR-22-3p	0.68757	0.334864	0.352706	9.02349e-28
UNK	PART1	hsa-miR-22-3p	0.721327	0.438402	0.282925	9.02349e-28
UNK	SNHG8	hsa-miR-22-3p	0.705431	0.348797	0.356634	9.02349e-28
USP31	EGOT	hsa-miR-200b-3p	0.719308	0.430867	0.288442	9.55305e-89
USP31	EGOT	hsa-miR-200c-3p	0.719308	0.437234	0.282075	4.5866e-81
VSNL1	GAS5	hsa-miR-22-3p	0.702345	0.418077	0.284268	9.02349e-28
VSNL1	SNHG8	hsa-miR-22-3p	0.686766	0.375666	0.3111	9.02349e-28
VTI1B	EMX2OS	hsa-miR-200b-3p	0.739011	0.411942	0.327069	9.55305e-89
VTI1B	EMX2OS	hsa-miR-200c-3p	0.739011	0.452065	0.286945	4.5866e-81
VTI1B	H19	hsa-miR-200b-3p	0.714837	0.419283	0.295554	9.55305e-89
VTI1B	H19	hsa-miR-200c-3p	0.714837	0.454061	0.260776	4.5866e-81
WNK2	EGOT	hsa-miR-205-5p	0.723594	0.354224	0.36937	4.24144e-50
WNK2	PART1	hsa-miR-205-5p	0.770724	0.514743	0.255981	4.24144e-50
WNK3	EGOT	hsa-miR-200b-3p	0.686014	0.334585	0.351429	9.55305e-89
WNK3	EGOT	hsa-miR-200c-3p	0.686014	0.355159	0.330855	4.5866e-81
WNK3	FAM66C	hsa-miR-200b-3p	0.712426	0.44425	0.268176	9.55305e-89
WNK3	FAM66C	hsa-miR-200c-3p	0.712426	0.456169	0.256257	4.5866e-81
WRNIP1	SNHG8	hsa-miR-22-3p	0.691864	0.409392	0.282472	9.02349e-28
WSCD1	H19	hsa-miR-22-3p	0.686276	0.423112	0.263164	9.02349e-28
WWC1	DGCR5	hsa-miR-205-5p	0.761834	0.476808	0.285026	4.24144e-50
WWC1	EGOT	hsa-miR-205-5p	0.787147	0.310924	0.476223	4.24144e-50
WWC1	FAM66C	hsa-miR-205-5p	0.736103	0.340108	0.395995	4.24144e-50
WWC1	PVT1	hsa-miR-205-5p	0.852292	0.574596	0.277695	4.24144e-50
XPO5	PVT1	hsa-miR-378a-3p	0.701686	0.444279	0.257407	0.028419
YPEL2	EMX2OS	hsa-miR-200b-3p	0.745368	0.475027	0.270341	9.55305e-89
YPEL2	EMX2OS	hsa-miR-200c-3p	0.745368	0.49026	0.255108	4.5866e-81
YTHDF2	PART1	hsa-miR-200a-3p	0.724028	0.37797	0.346057	2.27304e-92
YTHDF2	PVT1	hsa-miR-200a-3p	0.748164	0.427856	0.320308	2.27304e-92
YWHAG	EMX2OS	hsa-miR-141-3p	0.786234	0.491872	0.294361	2.2947e-75
YWHAG	EMX2OS	hsa-miR-200a-3p	0.786234	0.45734	0.328893	2.27304e-92
YWHAG	EMX2OS	hsa-miR-200b-3p	0.786234	0.508547	0.277687	9.55305e-89
YWHAG	EMX2OS	hsa-miR-200c-3p	0.786234	0.539745	0.246489	4.5866e-81
YWHAG	H19	hsa-miR-141-3p	0.716993	0.411454	0.305539	2.2947e-75
YWHAG	H19	hsa-miR-200a-3p	0.716993	0.381825	0.335169	2.27304e-92
YWHAG	H19	hsa-miR-200b-3p	0.716993	0.412785	0.304208	9.55305e-89
YWHAG	H19	hsa-miR-200c-3p	0.716993	0.445915	0.271078	4.5866e-81
ZBTB12	DGCR5	hsa-miR-200b-3p	0.747922	0.464121	0.283801	9.55305e-89
ZBTB12	DGCR5	hsa-miR-200c-3p	0.747922	0.480498	0.267424	4.5866e-81
ZBTB12	PVT1	hsa-miR-200b-3p	0.713442	0.254597	0.458845	9.55305e-89
ZBTB12	PVT1	hsa-miR-200c-3p	0.713442	0.295086	0.418356	4.5866e-81
ZBTB47	H19	hsa-miR-22-3p	0.731574	0.386898	0.344676	9.02349e-28
ZBTB5	DNM1P35	hsa-miR-200b-3p	0.710193	0.429297	0.280896	9.55305e-89
ZBTB5	DNM1P35	hsa-miR-200c-3p	0.710193	0.445985	0.264208	4.5866e-81
ZBTB5	FAM66C	hsa-miR-200b-3p	0.704434	0.326458	0.377976	9.55305e-89
ZBTB5	FAM66C	hsa-miR-200c-3p	0.704434	0.337077	0.367357	4.5866e-81
ZBTB5	PART1	hsa-miR-200b-3p	0.725501	0.175838	0.549662	9.55305e-89
ZBTB5	PART1	hsa-miR-200c-3p	0.725501	0.224146	0.501355	4.5866e-81
ZBTB5	PART1	hsa-miR-429	0.725501	0.397992	0.327509	4.58741e-17
ZBTB5	PVT1	hsa-miR-200b-3p	0.74346	0.23542	0.50804	9.55305e-89
ZBTB5	PVT1	hsa-miR-200c-3p	0.74346	0.259119	0.484342	4.5866e-81
ZBTB5	SNHG10	hsa-miR-200b-3p	0.726927	0.445889	0.281038	9.55305e-89
ZBTB5	SNHG10	hsa-miR-200c-3p	0.726927	0.438272	0.288655	4.5866e-81
ZBTB7C	DGCR5	hsa-miR-200b-3p	0.742813	0.372376	0.370437	9.55305e-89
ZBTB7C	DGCR5	hsa-miR-200c-3p	0.742813	0.363256	0.379557	4.5866e-81
ZBTB7C	EGOT	hsa-miR-200b-3p	0.691172	0.105752	0.58542	9.55305e-89
ZBTB7C	EGOT	hsa-miR-200c-3p	0.691172	0.0895594	0.601612	4.5866e-81
ZBTB7C	PART1	hsa-miR-200b-3p	0.822204	0.421296	0.400908	9.55305e-89
ZBTB7C	PART1	hsa-miR-200c-3p	0.822204	0.42185	0.400355	4.5866e-81
ZBTB7C	PART1	hsa-miR-429	0.822204	0.566185	0.256019	4.58741e-17
ZBTB7C	PVT1	hsa-miR-200b-3p	0.824203	0.428496	0.395708	9.55305e-89
ZBTB7C	PVT1	hsa-miR-200c-3p	0.824203	0.41042	0.413783	4.5866e-81
ZBTB7C	TMEM191A	hsa-miR-200b-3p	0.727151	0.461646	0.265506	9.55305e-89
ZBTB7C	TMEM191A	hsa-miR-200c-3p	0.727151	0.472183	0.254969	4.5866e-81
ZEB1	H19	hsa-miR-141-3p	0.708268	0.436096	0.272172	2.2947e-75
ZEB1	H19	hsa-miR-200a-3p	0.708268	0.412607	0.295661	2.27304e-92
ZEB1	H19	hsa-miR-200b-3p	0.708268	0.446653	0.261615	9.55305e-89
ZNF365	EGOT	hsa-miR-200b-3p	0.763288	0.394274	0.369014	9.55305e-89
ZNF365	EGOT	hsa-miR-200c-3p	0.763288	0.354212	0.409075	4.5866e-81
ZNF365	PVT1	hsa-miR-200b-3p	0.735077	0.242417	0.49266	9.55305e-89
ZNF365	PVT1	hsa-miR-200c-3p	0.735077	0.171074	0.564003	4.5866e-81
ZNF652	PART1	hsa-miR-200b-3p	0.739748	0.369294	0.370454	9.55305e-89
ZNF652	PART1	hsa-miR-200c-3p	0.739748	0.425215	0.314532	4.5866e-81
ZNF652	PART1	hsa-miR-429	0.739748	0.451678	0.28807	4.58741e-17
ZNF711	DGCR5	hsa-miR-200b-3p	0.711592	0.222296	0.489296	9.55305e-89
ZNF711	DGCR5	hsa-miR-200c-3p	0.711592	0.240969	0.470623	4.5866e-81
ZNF711	EGOT	hsa-miR-200b-3p	0.790752	0.301801	0.488951	9.55305e-89
ZNF711	EGOT	hsa-miR-200c-3p	0.790752	0.327901	0.462851	4.5866e-81
ZNF711	FAM66C	hsa-miR-200b-3p	0.767103	0.390854	0.376249	9.55305e-89
ZNF711	FAM66C	hsa-miR-200c-3p	0.767103	0.401218	0.365885	4.5866e-81
ZNF711	PART1	hsa-miR-200b-3p	0.778324	0.104916	0.673408	9.55305e-89
ZNF711	PART1	hsa-miR-200c-3p	0.778324	0.18414	0.594184	4.5866e-81
ZNF711	PART1	hsa-miR-429	0.778324	0.41496	0.363364	4.58741e-17
ZNF711	PVT1	hsa-miR-200b-3p	0.799273	0.190804	0.608469	9.55305e-89
ZNF711	PVT1	hsa-miR-200c-3p	0.799273	0.226963	0.572311	4.5866e-81
ZNF711	SNHG1	hsa-miR-200b-3p	0.732801	0.473793	0.259007	9.55305e-89
ZNF711	SNHG1	hsa-miR-200c-3p	0.732801	0.483703	0.249098	4.5866e-81
ZNF711	SNHG10	hsa-miR-200b-3p	0.732201	0.406567	0.325634	9.55305e-89
ZNF711	SNHG10	hsa-miR-200c-3p	0.732201	0.390565	0.341636	4.5866e-81
ZSWIM4	DGCR5	hsa-miR-200b-3p	0.739831	0.333926	0.405905	9.55305e-89
ZSWIM4	DGCR5	hsa-miR-200c-3p	0.739831	0.328524	0.411306	4.5866e-81
ZSWIM4	EGOT	hsa-miR-200b-3p	0.698691	0.0629589	0.635732	9.55305e-89
ZSWIM4	EGOT	hsa-miR-200c-3p	0.698691	0.0552029	0.643488	4.5866e-81
ZSWIM4	EGOT	hsa-miR-205-5p	0.698691	0.334186	0.364505	4.24144e-50
ZSWIM4	PART1	hsa-miR-200b-3p	0.763846	0.133255	0.630591	9.55305e-89
ZSWIM4	PART1	hsa-miR-200c-3p	0.763846	0.156283	0.607563	4.5866e-81
ZSWIM4	PART1	hsa-miR-429	0.763846	0.396829	0.367016	4.58741e-17
ZSWIM4	PVT1	hsa-miR-200b-3p	0.831404	0.389358	0.442046	9.55305e-89
ZSWIM4	PVT1	hsa-miR-200c-3p	0.831404	0.378359	0.453044	4.5866e-81
ZSWIM4	TMEM191A	hsa-miR-200b-3p	0.705083	0.40011	0.304972	9.55305e-89
ZSWIM4	TMEM191A	hsa-miR-200c-3p	0.705083	0.41456	0.290523	4.5866e-81

## Sheet: PVT1_sub-network
ceRNA1	ceRNA2	miRNA	correlation	partial_correlation	sensitivity	p_value
ABI2	PVT1	hsa-miR-200b-3p	0.811366	0.271848	0.539518	9.55305e-89
ABI2	PVT1	hsa-miR-200c-3p	0.811366	0.292546	0.51882	4.5866e-81
ABI2	PVT1	hsa-miR-205-5p	0.811366	0.54357	0.267797	4.24144e-50
ANK3	PVT1	hsa-miR-200b-3p	0.744648	0.0606242	0.684023	9.55305e-89
ANK3	PVT1	hsa-miR-200c-3p	0.744648	0.119331	0.625316	4.5866e-81
ARHGAP19	PVT1	hsa-miR-200b-3p	0.800039	0.268865	0.531174	9.55305e-89
ARHGAP19	PVT1	hsa-miR-200c-3p	0.800039	0.240182	0.559857	4.5866e-81
ARRDC3	PVT1	hsa-miR-200b-3p	0.705599	0.388581	0.317018	9.55305e-89
ARRDC3	PVT1	hsa-miR-200c-3p	0.705599	0.453416	0.252183	4.5866e-81
ATP1B1	PVT1	hsa-miR-141-3p	0.777913	0.460509	0.317404	2.2947e-75
ATP1B1	PVT1	hsa-miR-200a-3p	0.777913	0.372555	0.405358	2.27304e-92
AUTS2	PVT1	hsa-miR-200b-3p	0.755231	0.109042	0.646188	9.55305e-89
AUTS2	PVT1	hsa-miR-200c-3p	0.755231	0.165624	0.589607	4.5866e-81
B3GNT2	PVT1	hsa-miR-200a-3p	0.734968	0.45248	0.282488	2.27304e-92
B3GNT2	PVT1	hsa-miR-200b-3p	0.734968	0.420859	0.314109	9.55305e-89
B3GNT2	PVT1	hsa-miR-200c-3p	0.734968	0.414658	0.32031	4.5866e-81
BAMBI	PVT1	hsa-miR-205-5p	0.747123	0.428687	0.318436	4.24144e-50
BCL11B	PVT1	hsa-miR-200b-3p	0.771889	0.309759	0.46213	9.55305e-89
BCL11B	PVT1	hsa-miR-200c-3p	0.771889	0.340903	0.430986	4.5866e-81
BEND3	PVT1	hsa-miR-141-3p	0.772671	0.37585	0.396822	2.2947e-75
BEND3	PVT1	hsa-miR-200a-3p	0.772671	0.337419	0.435253	2.27304e-92
C10orf95	PVT1	hsa-miR-200b-3p	0.738784	0.132358	0.606426	9.55305e-89
C10orf95	PVT1	hsa-miR-200c-3p	0.738784	0.206551	0.532233	4.5866e-81
C17orf100	PVT1	hsa-miR-141-3p	0.833074	0.497239	0.335835	2.2947e-75
C17orf100	PVT1	hsa-miR-200a-3p	0.833074	0.458957	0.374116	2.27304e-92
C17orf100	PVT1	hsa-miR-200b-3p	0.833074	0.39579	0.437284	9.55305e-89
C17orf100	PVT1	hsa-miR-200c-3p	0.833074	0.40306	0.430013	4.5866e-81
C3orf14	PVT1	hsa-miR-141-3p	0.805492	0.425025	0.380467	2.2947e-75
C3orf14	PVT1	hsa-miR-200a-3p	0.805492	0.383425	0.422067	2.27304e-92
C4orf36	PVT1	hsa-miR-205-5p	0.689972	0.281689	0.408283	4.24144e-50
CACNA1C	PVT1	hsa-miR-200b-3p	0.795289	0.368576	0.426713	9.55305e-89
CACNA1C	PVT1	hsa-miR-200c-3p	0.795289	0.348395	0.446894	4.5866e-81
CASK	PVT1	hsa-miR-200b-3p	0.725511	0.199502	0.526009	9.55305e-89
CASK	PVT1	hsa-miR-200c-3p	0.725511	0.236131	0.48938	4.5866e-81
CASKIN1	PVT1	hsa-miR-200b-3p	0.697604	0.262799	0.434806	9.55305e-89
CASKIN1	PVT1	hsa-miR-200c-3p	0.697604	0.335459	0.362145	4.5866e-81
CASZ1	PVT1	hsa-miR-200b-3p	0.816173	0.247375	0.568799	9.55305e-89
CASZ1	PVT1	hsa-miR-200c-3p	0.816173	0.270201	0.545973	4.5866e-81
CBX4	PVT1	hsa-miR-200b-3p	0.701547	0.206228	0.495319	9.55305e-89
CBX4	PVT1	hsa-miR-200c-3p	0.701547	0.203883	0.497664	4.5866e-81
CCDC6	PVT1	hsa-miR-141-3p	0.712806	0.300548	0.412258	2.2947e-75
CCDC6	PVT1	hsa-miR-200a-3p	0.712806	0.22837	0.484436	2.27304e-92
CCDC85C	PVT1	hsa-miR-141-3p	0.820297	0.412359	0.407938	2.2947e-75
CCDC85C	PVT1	hsa-miR-200a-3p	0.820297	0.345127	0.47517	2.27304e-92
CCNJL	PVT1	hsa-miR-200b-3p	0.834247	0.424098	0.410149	9.55305e-89
CCNJL	PVT1	hsa-miR-200c-3p	0.834247	0.411741	0.422506	4.5866e-81
CDC14A	PVT1	hsa-miR-141-3p	0.690575	0.380465	0.31011	2.2947e-75
CDC14A	PVT1	hsa-miR-200a-3p	0.690575	0.364409	0.326165	2.27304e-92
CDC14A	PVT1	hsa-miR-22-3p	0.690575	0.436127	0.254448	9.02349e-28
CDK2	PVT1	hsa-miR-200b-3p	0.837133	0.377004	0.460129	9.55305e-89
CDK2	PVT1	hsa-miR-200c-3p	0.837133	0.390387	0.446746	4.5866e-81
CHKA	PVT1	hsa-miR-141-3p	0.784455	0.423648	0.360808	2.2947e-75
CHKA	PVT1	hsa-miR-200a-3p	0.784455	0.283287	0.501168	2.27304e-92
CHST9	PVT1	hsa-miR-200b-3p	0.841816	0.231936	0.60988	9.55305e-89
CHST9	PVT1	hsa-miR-200c-3p	0.841816	0.260621	0.581195	4.5866e-81
CHSY1	PVT1	hsa-miR-200b-3p	0.786749	0.522197	0.264553	9.55305e-89
CHSY1	PVT1	hsa-miR-200c-3p	0.786749	0.5366	0.250149	4.5866e-81
CNKSR3	PVT1	hsa-miR-200b-3p	0.70205	0.450663	0.251386	9.55305e-89
CNNM1	PVT1	hsa-miR-205-5p	0.768769	0.401311	0.367458	4.24144e-50
CTBP2	PVT1	hsa-miR-141-3p	0.831729	0.441358	0.390371	2.2947e-75
CTBP2	PVT1	hsa-miR-200a-3p	0.831729	0.400746	0.430983	2.27304e-92
CTBP2	PVT1	hsa-miR-200b-3p	0.831729	0.402163	0.429565	9.55305e-89
CTBP2	PVT1	hsa-miR-200c-3p	0.831729	0.446319	0.385409	4.5866e-81
CTNND2	PVT1	hsa-miR-141-3p	0.797976	0.403684	0.394291	2.2947e-75
CTNND2	PVT1	hsa-miR-200a-3p	0.797976	0.350107	0.447869	2.27304e-92
CTNND2	PVT1	hsa-miR-200b-3p	0.797976	0.279207	0.518768	9.55305e-89
CTNND2	PVT1	hsa-miR-200c-3p	0.797976	0.248038	0.549937	4.5866e-81
CXADR	PVT1	hsa-miR-141-3p	0.847187	0.426599	0.420588	2.2947e-75
CXADR	PVT1	hsa-miR-200a-3p	0.847187	0.360524	0.486663	2.27304e-92
DCAF7	PVT1	hsa-miR-200b-3p	0.686987	0.22949	0.457497	9.55305e-89
DCAF7	PVT1	hsa-miR-200c-3p	0.686987	0.285249	0.401738	4.5866e-81
DCDC2	PVT1	hsa-miR-200b-3p	0.725099	-0.0964565	0.821556	9.55305e-89
DCDC2	PVT1	hsa-miR-200c-3p	0.725099	-0.127249	0.852348	4.5866e-81
DCDC2	PVT1	hsa-miR-205-5p	0.725099	0.273422	0.451678	4.24144e-50
DGKA	PVT1	hsa-miR-200b-3p	0.738971	0.399933	0.339038	9.55305e-89
DGKA	PVT1	hsa-miR-200c-3p	0.738971	0.343176	0.395796	4.5866e-81
DIRAS2	PVT1	hsa-miR-200b-3p	0.720144	0.210257	0.509887	9.55305e-89
DIRAS2	PVT1	hsa-miR-200c-3p	0.720144	0.27849	0.441654	4.5866e-81
DLG3	PVT1	hsa-miR-141-3p	0.908163	0.626908	0.281255	2.2947e-75
DLG3	PVT1	hsa-miR-200a-3p	0.908163	0.567171	0.340992	2.27304e-92
DNMT3B	PVT1	hsa-miR-200b-3p	0.690915	0.208221	0.482693	9.55305e-89
DNMT3B	PVT1	hsa-miR-200c-3p	0.690915	0.236927	0.453988	4.5866e-81
DRD2	PVT1	hsa-miR-141-3p	0.840316	0.383531	0.456786	2.2947e-75
DRD2	PVT1	hsa-miR-200a-3p	0.840316	0.343429	0.496888	2.27304e-92
DSC1	PVT1	hsa-miR-205-5p	0.755803	0.36125	0.394553	4.24144e-50
DSC2	PVT1	hsa-miR-205-5p	0.789747	0.448322	0.341424	4.24144e-50
EFNA1	PVT1	hsa-miR-200b-3p	0.703272	0.170578	0.532694	9.55305e-89
EFNA1	PVT1	hsa-miR-200c-3p	0.703272	0.187872	0.5154	4.5866e-81
ENPP5	PVT1	hsa-miR-141-3p	0.796331	0.333441	0.462889	2.2947e-75
ENPP5	PVT1	hsa-miR-200a-3p	0.796331	0.271948	0.524382	2.27304e-92
ESRP1	PVT1	hsa-miR-200b-3p	0.83946	0.127936	0.711524	9.55305e-89
ESRP1	PVT1	hsa-miR-200c-3p	0.83946	0.0898968	0.749563	4.5866e-81
ESRRG	PVT1	hsa-miR-141-3p	0.690137	0.277323	0.412814	2.2947e-75
ESRRG	PVT1	hsa-miR-200a-3p	0.690137	0.254357	0.43578	2.27304e-92
ESRRG	PVT1	hsa-miR-200b-3p	0.690137	0.159171	0.530966	9.55305e-89
ESRRG	PVT1	hsa-miR-200c-3p	0.690137	0.248465	0.441672	4.5866e-81
ETV5	PVT1	hsa-miR-200b-3p	0.785616	0.472592	0.313024	9.55305e-89
ETV5	PVT1	hsa-miR-200c-3p	0.785616	0.509308	0.276308	4.5866e-81
FAM81A	PVT1	hsa-miR-200b-3p	0.753583	0.408634	0.34495	9.55305e-89
FAM81A	PVT1	hsa-miR-200c-3p	0.753583	0.474609	0.278974	4.5866e-81
FARP1	PVT1	hsa-miR-200b-3p	0.799164	0.418932	0.380231	9.55305e-89
FARP1	PVT1	hsa-miR-200c-3p	0.799164	0.450438	0.348726	4.5866e-81
FBXL16	PVT1	hsa-miR-200b-3p	0.876145	0.341979	0.534166	9.55305e-89
FBXL16	PVT1	hsa-miR-200c-3p	0.876145	0.295622	0.580524	4.5866e-81
FBXL19	PVT1	hsa-miR-141-3p	0.716868	0.308779	0.408089	2.2947e-75
FBXL19	PVT1	hsa-miR-200a-3p	0.716868	0.303838	0.41303	2.27304e-92
FOXA1	PVT1	hsa-miR-141-3p	0.821975	0.385911	0.436064	2.2947e-75
FOXA1	PVT1	hsa-miR-200a-3p	0.821975	0.342023	0.479952	2.27304e-92
FRMD6	PVT1	hsa-miR-141-3p	0.726644	0.332952	0.393692	2.2947e-75
FRMD6	PVT1	hsa-miR-200a-3p	0.726644	0.32308	0.403564	2.27304e-92
FRMD6	PVT1	hsa-miR-200b-3p	0.726644	0.318562	0.408082	9.55305e-89
FRMD6	PVT1	hsa-miR-200c-3p	0.726644	0.310798	0.415846	4.5866e-81
GAL3ST1	PVT1	hsa-miR-200b-3p	0.693894	0.382724	0.311169	9.55305e-89
GAL3ST1	PVT1	hsa-miR-200c-3p	0.693894	0.38295	0.310944	4.5866e-81
GATA3	PVT1	hsa-miR-141-3p	0.826484	0.397018	0.429466	2.2947e-75
GATA3	PVT1	hsa-miR-200a-3p	0.826484	0.33625	0.490234	2.27304e-92
GATA3	PVT1	hsa-miR-205-5p	0.826484	0.494439	0.332045	4.24144e-50
GCNT2	PVT1	hsa-miR-141-3p	0.846217	0.448773	0.397445	2.2947e-75
GCNT2	PVT1	hsa-miR-200a-3p	0.846217	0.367748	0.47847	2.27304e-92
GNG7	PVT1	hsa-miR-141-3p	0.772181	0.266045	0.506136	2.2947e-75
GNG7	PVT1	hsa-miR-200a-3p	0.772181	0.209399	0.562782	2.27304e-92
GOLM1	PVT1	hsa-miR-141-3p	0.737827	0.287151	0.450676	2.2947e-75
GOLM1	PVT1	hsa-miR-200a-3p	0.737827	0.28554	0.452287	2.27304e-92
GPC2	PVT1	hsa-miR-141-3p	0.734307	0.36297	0.371337	2.2947e-75
GPC2	PVT1	hsa-miR-200a-3p	0.734307	0.351267	0.38304	2.27304e-92
GPM6B	PVT1	hsa-miR-141-3p	0.795129	0.339337	0.455793	2.2947e-75
GPM6B	PVT1	hsa-miR-200a-3p	0.795129	0.297497	0.497633	2.27304e-92
GPR12	PVT1	hsa-miR-200a-3p	0.704964	0.435809	0.269155	2.27304e-92
GPR27	PVT1	hsa-miR-200b-3p	0.720446	0.263468	0.456978	9.55305e-89
GPR27	PVT1	hsa-miR-200c-3p	0.720446	0.280995	0.439451	4.5866e-81
GPR75	PVT1	hsa-miR-141-3p	0.701589	0.209781	0.491808	2.2947e-75
GPR75	PVT1	hsa-miR-200a-3p	0.701589	0.197608	0.503981	2.27304e-92
GRAMD1C	PVT1	hsa-miR-205-5p	0.830722	0.526144	0.304578	4.24144e-50
GRHL2	PVT1	hsa-miR-141-3p	0.865071	0.46823	0.396841	2.2947e-75
GRHL2	PVT1	hsa-miR-200a-3p	0.865071	0.41193	0.453142	2.27304e-92
GRIP1	PVT1	hsa-miR-200b-3p	0.746463	0.206238	0.540225	9.55305e-89
GRIP1	PVT1	hsa-miR-200c-3p	0.746463	0.265729	0.480733	4.5866e-81
HNRNPD	PVT1	hsa-miR-200b-3p	0.709394	0.353689	0.355706	9.55305e-89
HNRNPD	PVT1	hsa-miR-200c-3p	0.709394	0.429474	0.27992	4.5866e-81
HNRNPF	PVT1	hsa-miR-141-3p	0.700218	0.341365	0.358852	2.2947e-75
HNRNPF	PVT1	hsa-miR-200a-3p	0.700218	0.260433	0.439785	2.27304e-92
HOOK1	PVT1	hsa-miR-200b-3p	0.857542	0.157563	0.699978	9.55305e-89
HOOK1	PVT1	hsa-miR-200c-3p	0.857542	0.0987518	0.75879	4.5866e-81
IFFO2	PVT1	hsa-miR-141-3p	0.790167	0.419806	0.370361	2.2947e-75
IFFO2	PVT1	hsa-miR-200a-3p	0.790167	0.345331	0.444836	2.27304e-92
IGF1R	PVT1	hsa-miR-141-3p	0.779764	0.278981	0.500782	2.2947e-75
IGF1R	PVT1	hsa-miR-200a-3p	0.779764	0.274145	0.505619	2.27304e-92
IGSF3	PVT1	hsa-miR-200b-3p	0.8275	0.230399	0.597101	9.55305e-89
IGSF3	PVT1	hsa-miR-200c-3p	0.8275	0.278631	0.548869	4.5866e-81
IKBKB	PVT1	hsa-miR-200b-3p	0.707697	0.249536	0.458161	9.55305e-89
IKBKB	PVT1	hsa-miR-200c-3p	0.707697	0.236768	0.470929	4.5866e-81
ITGA10	PVT1	hsa-miR-22-3p	0.733473	0.488584	0.24489	9.02349e-28
KDM2B	PVT1	hsa-miR-141-3p	0.811425	0.564811	0.246614	2.2947e-75
KDM2B	PVT1	hsa-miR-200a-3p	0.811425	0.505316	0.306108	2.27304e-92
KIAA0895	PVT1	hsa-miR-200b-3p	0.798372	0.113539	0.684833	9.55305e-89
KIAA0895	PVT1	hsa-miR-200c-3p	0.798372	0.127702	0.670671	4.5866e-81
KIF26B	PVT1	hsa-miR-200b-3p	0.752591	0.159605	0.592986	9.55305e-89
KIF26B	PVT1	hsa-miR-200c-3p	0.752591	0.213655	0.538937	4.5866e-81
KIF3A	PVT1	hsa-miR-141-3p	0.694765	0.28032	0.414445	2.2947e-75
KIF3A	PVT1	hsa-miR-200a-3p	0.694765	0.273555	0.42121	2.27304e-92
KRT80	PVT1	hsa-miR-200b-3p	0.867368	0.345303	0.522065	9.55305e-89
KRT80	PVT1	hsa-miR-200c-3p	0.867368	0.304606	0.562763	4.5866e-81
LBH	PVT1	hsa-miR-205-5p	0.770594	0.503757	0.266836	4.24144e-50
LPAR3	PVT1	hsa-miR-141-3p	0.774129	0.355838	0.418292	2.2947e-75
LPAR3	PVT1	hsa-miR-200a-3p	0.774129	0.295955	0.478175	2.27304e-92
LRRC1	PVT1	hsa-miR-141-3p	0.882387	0.593471	0.288916	2.2947e-75
LRRC1	PVT1	hsa-miR-200a-3p	0.882387	0.538848	0.343539	2.27304e-92
LYPD6	PVT1	hsa-miR-141-3p	0.793669	0.294834	0.498835	2.2947e-75
LYPD6	PVT1	hsa-miR-200a-3p	0.793669	0.265609	0.528061	2.27304e-92
LYPD6	PVT1	hsa-miR-205-5p	0.793669	0.468701	0.324968	4.24144e-50
MAGED4	PVT1	hsa-miR-141-3p	0.778357	0.330368	0.447989	2.2947e-75
MAGED4	PVT1	hsa-miR-200a-3p	0.778357	0.270976	0.507381	2.27304e-92
MAGED4B	PVT1	hsa-miR-141-3p	0.818385	0.377037	0.441348	2.2947e-75
MAGED4B	PVT1	hsa-miR-200a-3p	0.818385	0.307624	0.510761	2.27304e-92
MAP3K1	PVT1	hsa-miR-200b-3p	0.76526	0.260457	0.504803	9.55305e-89
MAP3K1	PVT1	hsa-miR-200c-3p	0.76526	0.283475	0.481785	4.5866e-81
MAP3K9	PVT1	hsa-miR-205-5p	0.820107	0.539898	0.28021	4.24144e-50
MORN4	PVT1	hsa-miR-205-5p	0.751968	0.39454	0.357428	4.24144e-50
MSH6	PVT1	hsa-miR-141-3p	0.70038	0.320447	0.379933	2.2947e-75
MSH6	PVT1	hsa-miR-200a-3p	0.70038	0.27419	0.42619	2.27304e-92
MYB	PVT1	hsa-miR-200b-3p	0.825927	0.165933	0.659994	9.55305e-89
MYB	PVT1	hsa-miR-200c-3p	0.825927	0.0949356	0.730992	4.5866e-81
MYLK	PVT1	hsa-miR-200b-3p	0.743995	0.149456	0.594539	9.55305e-89
MYLK	PVT1	hsa-miR-200c-3p	0.743995	0.130731	0.613264	4.5866e-81
NCKAP5	PVT1	hsa-miR-141-3p	0.77135	0.37897	0.392379	2.2947e-75
NCKAP5	PVT1	hsa-miR-200a-3p	0.77135	0.353819	0.417531	2.27304e-92
NEO1	PVT1	hsa-miR-200b-3p	0.724213	0.227003	0.49721	9.55305e-89
NEO1	PVT1	hsa-miR-200c-3p	0.724213	0.268387	0.455827	4.5866e-81
NFASC	PVT1	hsa-miR-141-3p	0.795273	0.2571	0.538172	2.2947e-75
NFASC	PVT1	hsa-miR-200a-3p	0.795273	0.265156	0.530116	2.27304e-92
NFASC	PVT1	hsa-miR-200b-3p	0.795273	0.229306	0.565967	9.55305e-89
NFASC	PVT1	hsa-miR-200c-3p	0.795273	0.220681	0.574592	4.5866e-81
NGEF	PVT1	hsa-miR-200b-3p	0.733305	0.457695	0.27561	9.55305e-89
NGEF	PVT1	hsa-miR-200c-3p	0.733305	0.462897	0.270408	4.5866e-81
NIPAL3	PVT1	hsa-miR-141-3p	0.759155	0.14805	0.611105	2.2947e-75
NIPAL3	PVT1	hsa-miR-200a-3p	0.759155	0.0917845	0.667371	2.27304e-92
NPAS3	PVT1	hsa-miR-141-3p	0.700113	0.37372	0.326393	2.2947e-75
NPAS3	PVT1	hsa-miR-200a-3p	0.700113	0.295879	0.404234	2.27304e-92
NPNT	PVT1	hsa-miR-200b-3p	0.687434	0.259512	0.427921	9.55305e-89
NPNT	PVT1	hsa-miR-200c-3p	0.687434	0.2909	0.396533	4.5866e-81
NRG1	PVT1	hsa-miR-200b-3p	0.829679	0.266473	0.563206	9.55305e-89
NRG1	PVT1	hsa-miR-200c-3p	0.829679	0.260183	0.569496	4.5866e-81
NUP35	PVT1	hsa-miR-200b-3p	0.7842	0.433904	0.350296	9.55305e-89
NUP35	PVT1	hsa-miR-200c-3p	0.7842	0.465262	0.318938	4.5866e-81
OCLN	PVT1	hsa-miR-200b-3p	0.862546	0.269919	0.592627	9.55305e-89
OCLN	PVT1	hsa-miR-200c-3p	0.862546	0.267786	0.594761	4.5866e-81
PAK6	PVT1	hsa-miR-200b-3p	0.832304	0.23359	0.598714	9.55305e-89
PAK6	PVT1	hsa-miR-200c-3p	0.832304	0.209713	0.622591	4.5866e-81
PAQR5	PVT1	hsa-miR-141-3p	0.71502	0.430365	0.284655	2.2947e-75
PAQR5	PVT1	hsa-miR-200a-3p	0.71502	0.464508	0.250512	2.27304e-92
PAQR5	PVT1	hsa-miR-200b-3p	0.71502	0.411949	0.30307	9.55305e-89
PAQR5	PVT1	hsa-miR-200c-3p	0.71502	0.40268	0.31234	4.5866e-81
PARD6B	PVT1	hsa-miR-200b-3p	0.698215	-0.0318531	0.730068	9.55305e-89
PARD6B	PVT1	hsa-miR-200c-3p	0.698215	-0.121015	0.81923	4.5866e-81
PARD6B	PVT1	hsa-miR-205-5p	0.698215	0.316627	0.381587	4.24144e-50
PDCD4	PVT1	hsa-miR-141-3p	0.785264	0.33913	0.446133	2.2947e-75
PDCD4	PVT1	hsa-miR-200a-3p	0.785264	0.294522	0.490742	2.27304e-92
PHF12	PVT1	hsa-miR-200b-3p	0.728372	0.224502	0.50387	9.55305e-89
PHF12	PVT1	hsa-miR-200c-3p	0.728372	0.224364	0.504008	4.5866e-81
PHF12	PVT1	hsa-miR-22-3p	0.728372	0.442805	0.285567	9.02349e-28
PHF21B	PVT1	hsa-miR-200b-3p	0.702151	0.264325	0.437826	9.55305e-89
PHF21B	PVT1	hsa-miR-200c-3p	0.702151	0.239489	0.462662	4.5866e-81
PKP1	PVT1	hsa-miR-200b-3p	0.710176	0.199803	0.510373	9.55305e-89
PKP1	PVT1	hsa-miR-200c-3p	0.710176	0.234253	0.475924	4.5866e-81
PLEKHA6	PVT1	hsa-miR-200b-3p	0.831503	0.185027	0.646476	9.55305e-89
PLEKHA6	PVT1	hsa-miR-200c-3p	0.831503	0.181055	0.650449	4.5866e-81
PLEKHB1	PVT1	hsa-miR-141-3p	0.867727	0.542336	0.325391	2.2947e-75
PLEKHB1	PVT1	hsa-miR-200a-3p	0.867727	0.471834	0.395893	2.27304e-92
PLK2	PVT1	hsa-miR-200b-3p	0.71543	0.184688	0.530743	9.55305e-89
PLK2	PVT1	hsa-miR-200c-3p	0.71543	0.204689	0.510742	4.5866e-81
POGK	PVT1	hsa-miR-22-3p	0.719994	0.468416	0.251578	9.02349e-28
PPP2R2B	PVT1	hsa-miR-141-3p	0.713131	0.418982	0.294149	2.2947e-75
PPP2R2B	PVT1	hsa-miR-200a-3p	0.713131	0.461257	0.251873	2.27304e-92
PRMT6	PVT1	hsa-miR-205-5p	0.766162	0.482799	0.283363	4.24144e-50
PRPF38A	PVT1	hsa-miR-22-3p	0.752628	0.456298	0.29633	9.02349e-28
PRRG4	PVT1	hsa-miR-200b-3p	0.86606	0.335055	0.531005	9.55305e-89
PRRG4	PVT1	hsa-miR-200c-3p	0.86606	0.315855	0.550205	4.5866e-81
PTBP1	PVT1	hsa-miR-200b-3p	0.734265	0.342364	0.391901	9.55305e-89
PTBP1	PVT1	hsa-miR-200c-3p	0.734265	0.348512	0.385753	4.5866e-81
PTCHD1	PVT1	hsa-miR-205-5p	0.777385	0.453344	0.324041	4.24144e-50
PTDSS1	PVT1	hsa-miR-200b-3p	0.711282	0.417202	0.29408	9.55305e-89
RAB38	PVT1	hsa-miR-141-3p	0.826717	0.519221	0.307495	2.2947e-75
RAB38	PVT1	hsa-miR-200a-3p	0.826717	0.447782	0.378935	2.27304e-92
RALGPS1	PVT1	hsa-miR-141-3p	0.736086	0.244255	0.491831	2.2947e-75
RALGPS1	PVT1	hsa-miR-200a-3p	0.736086	0.184029	0.552057	2.27304e-92
RALGPS2	PVT1	hsa-miR-141-3p	0.696432	0.207124	0.489308	2.2947e-75
RALGPS2	PVT1	hsa-miR-200a-3p	0.696432	0.175223	0.521209	2.27304e-92
RALGPS2	PVT1	hsa-miR-200b-3p	0.696432	0.0558411	0.640591	9.55305e-89
RALGPS2	PVT1	hsa-miR-200c-3p	0.696432	0.0787623	0.61767	4.5866e-81
RARB	PVT1	hsa-miR-141-3p	0.713194	0.246593	0.4666	2.2947e-75
RARB	PVT1	hsa-miR-200a-3p	0.713194	0.222604	0.49059	2.27304e-92
RBBP8	PVT1	hsa-miR-200b-3p	0.815525	0.241654	0.573871	9.55305e-89
RBBP8	PVT1	hsa-miR-200c-3p	0.815525	0.221814	0.593711	4.5866e-81
RBM47	PVT1	hsa-miR-141-3p	0.794187	0.379472	0.414715	2.2947e-75
RBM47	PVT1	hsa-miR-200a-3p	0.794187	0.312202	0.481985	2.27304e-92
RBM47	PVT1	hsa-miR-205-5p	0.794187	0.501929	0.292258	4.24144e-50
RHPN2	PVT1	hsa-miR-141-3p	0.917582	0.661879	0.255703	2.2947e-75
RHPN2	PVT1	hsa-miR-200a-3p	0.917582	0.59397	0.323612	2.27304e-92
RIMS3	PVT1	hsa-miR-200b-3p	0.698057	0.00673172	0.691325	9.55305e-89
RIMS3	PVT1	hsa-miR-200c-3p	0.698057	-0.0193578	0.717414	4.5866e-81
RNF207	PVT1	hsa-miR-205-5p	0.720792	0.454956	0.265837	4.24144e-50
RNF44	PVT1	hsa-miR-141-3p	0.766573	0.354365	0.412209	2.2947e-75
RNF44	PVT1	hsa-miR-200a-3p	0.766573	0.337635	0.428939	2.27304e-92
RUNX1	PVT1	hsa-miR-141-3p	0.863638	0.54727	0.316368	2.2947e-75
RUNX1	PVT1	hsa-miR-200a-3p	0.863638	0.505827	0.35781	2.27304e-92
RUNX2	PVT1	hsa-miR-205-5p	0.822719	0.556714	0.266005	4.24144e-50
SCD5	PVT1	hsa-miR-141-3p	0.715422	0.366638	0.348784	2.2947e-75
SCD5	PVT1	hsa-miR-200a-3p	0.715422	0.32108	0.394342	2.27304e-92
SCD5	PVT1	hsa-miR-205-5p	0.715422	0.410447	0.304975	4.24144e-50
SCN2A	PVT1	hsa-miR-200b-3p	0.731862	0.144174	0.587688	9.55305e-89
SCN2A	PVT1	hsa-miR-200c-3p	0.731862	0.131551	0.600311	4.5866e-81
SCN8A	PVT1	hsa-miR-200b-3p	0.769516	0.264532	0.504983	9.55305e-89
SCN8A	PVT1	hsa-miR-200c-3p	0.769516	0.311513	0.458003	4.5866e-81
SDK2	PVT1	hsa-miR-200b-3p	0.873311	0.333574	0.539737	9.55305e-89
SDK2	PVT1	hsa-miR-200c-3p	0.873311	0.290485	0.582826	4.5866e-81
SHROOM2	PVT1	hsa-miR-200b-3p	0.863907	0.275102	0.588805	9.55305e-89
SHROOM2	PVT1	hsa-miR-200c-3p	0.863907	0.255532	0.608375	4.5866e-81
SIPA1L1	PVT1	hsa-miR-205-5p	0.719627	0.391183	0.328444	4.24144e-50
SLC1A2	PVT1	hsa-miR-200b-3p	0.748572	0.221394	0.527178	9.55305e-89
SLC1A2	PVT1	hsa-miR-200c-3p	0.748572	0.225641	0.522931	4.5866e-81
SLC2A12	PVT1	hsa-miR-22-3p	0.705275	0.457984	0.247291	9.02349e-28
SLC4A7	PVT1	hsa-miR-200b-3p	0.688614	0.0960832	0.592531	9.55305e-89
SLC4A7	PVT1	hsa-miR-200c-3p	0.688614	0.111911	0.576703	4.5866e-81
SORBS2	PVT1	hsa-miR-141-3p	0.74518	0.381465	0.363715	2.2947e-75
SORBS2	PVT1	hsa-miR-200a-3p	0.74518	0.387165	0.358015	2.27304e-92
SPATS2	PVT1	hsa-miR-141-3p	0.82729	0.449319	0.377971	2.2947e-75
SPATS2	PVT1	hsa-miR-200a-3p	0.82729	0.401967	0.425323	2.27304e-92
ST6GALNAC5	PVT1	hsa-miR-200b-3p	0.81902	0.232201	0.586819	9.55305e-89
ST6GALNAC5	PVT1	hsa-miR-200c-3p	0.81902	0.186714	0.632306	4.5866e-81
STRBP	PVT1	hsa-miR-205-5p	0.757346	0.497652	0.259693	4.24144e-50
SVIP	PVT1	hsa-miR-205-5p	0.723265	0.470114	0.25315	4.24144e-50
TBC1D22B	PVT1	hsa-miR-200b-3p	0.796304	0.396179	0.400125	9.55305e-89
TBC1D22B	PVT1	hsa-miR-200c-3p	0.796304	0.44934	0.346964	4.5866e-81
TET3	PVT1	hsa-miR-141-3p	0.733128	0.334528	0.398601	2.2947e-75
TET3	PVT1	hsa-miR-200a-3p	0.733128	0.295193	0.437936	2.27304e-92
TFAP2A	PVT1	hsa-miR-141-3p	0.888478	0.541718	0.34676	2.2947e-75
TFAP2A	PVT1	hsa-miR-200a-3p	0.888478	0.484656	0.403822	2.27304e-92
TFAP2A	PVT1	hsa-miR-200b-3p	0.888478	0.332421	0.556058	9.55305e-89
TFAP2A	PVT1	hsa-miR-200c-3p	0.888478	0.27623	0.612249	4.5866e-81
TFAP2C	PVT1	hsa-miR-141-3p	0.913481	0.651426	0.262055	2.2947e-75
TFAP2C	PVT1	hsa-miR-200a-3p	0.913481	0.596479	0.317002	2.27304e-92
TIGD2	PVT1	hsa-miR-200b-3p	0.772164	0.383993	0.388171	9.55305e-89
TIGD2	PVT1	hsa-miR-200c-3p	0.772164	0.420845	0.351319	4.5866e-81
TMEM130	PVT1	hsa-miR-141-3p	0.692366	0.236736	0.45563	2.2947e-75
TMEM130	PVT1	hsa-miR-200a-3p	0.692366	0.222613	0.469752	2.27304e-92
TMEM229B	PVT1	hsa-miR-200b-3p	0.788598	0.293291	0.495307	9.55305e-89
TMEM229B	PVT1	hsa-miR-200c-3p	0.788598	0.278015	0.510583	4.5866e-81
TP73	PVT1	hsa-miR-200b-3p	0.744873	0.12725	0.617622	9.55305e-89
TP73	PVT1	hsa-miR-200c-3p	0.744873	0.0334278	0.711445	4.5866e-81
TRIM2	PVT1	hsa-miR-200b-3p	0.695685	0.125066	0.570619	9.55305e-89
TRIM2	PVT1	hsa-miR-200c-3p	0.695685	0.162768	0.532917	4.5866e-81
UBE2Z	PVT1	hsa-miR-141-3p	0.706172	0.371042	0.33513	2.2947e-75
UBE2Z	PVT1	hsa-miR-200a-3p	0.706172	0.305421	0.40075	2.27304e-92
WWC1	PVT1	hsa-miR-205-5p	0.852292	0.574596	0.277695	4.24144e-50
XPO5	PVT1	hsa-miR-378a-3p	0.701686	0.444279	0.257407	0.028419
YTHDF2	PVT1	hsa-miR-200a-3p	0.748164	0.427856	0.320308	2.27304e-92
ZBTB12	PVT1	hsa-miR-200b-3p	0.713442	0.254597	0.458845	9.55305e-89
ZBTB12	PVT1	hsa-miR-200c-3p	0.713442	0.295086	0.418356	4.5866e-81
ZBTB5	PVT1	hsa-miR-200b-3p	0.74346	0.23542	0.50804	9.55305e-89
ZBTB5	PVT1	hsa-miR-200c-3p	0.74346	0.259119	0.484342	4.5866e-81
ZBTB7C	PVT1	hsa-miR-200b-3p	0.824203	0.428496	0.395708	9.55305e-89
ZBTB7C	PVT1	hsa-miR-200c-3p	0.824203	0.41042	0.413783	4.5866e-81
ZNF365	PVT1	hsa-miR-200b-3p	0.735077	0.242417	0.49266	9.55305e-89
ZNF365	PVT1	hsa-miR-200c-3p	0.735077	0.171074	0.564003	4.5866e-81
ZNF711	PVT1	hsa-miR-200b-3p	0.799273	0.190804	0.608469	9.55305e-89
ZNF711	PVT1	hsa-miR-200c-3p	0.799273	0.226963	0.572311	4.5866e-81
ZSWIM4	PVT1	hsa-miR-200b-3p	0.831404	0.389358	0.442046	9.55305e-89
ZSWIM4	PVT1	hsa-miR-200c-3p	0.831404	0.378359	0.453044	4.5866e-81

## Sheet: miR_mediating_PVT1_subnet
miRNA ID	# of ceRNA mediated interaction in the PVT1 sub-network
hsa-miR-141-3p	61			hsa-miR-200 family	297
hsa-miR-200a-3p	64			hsa-miR-205-5p	24
hsa-miR-200b-3p	87			hsa-miR-22-3p	6
hsa-miR-200c-3p	85			hsa-miR-378a-3p	1
hsa-miR-205-5p	24
hsa-miR-22-3p	6
hsa-miR-378a-3p	1
Total	328
